# Supplementary material
Source: PubMed Central journal article supplement (PMC2872922)

## Supporting Information

### Discovery of Brain-Penetrant, Orally Bioavailable Aminothienopyridazine Inhibitors of Tau Aggregation

Carlo Ballatore,<sup>a, b\*</sup> Kurt R. Brunden,<sup>b</sup> Francesco Piscitelli,<sup>a</sup> Michael J. James,<sup>b</sup> Alex Crowe,<sup>b</sup> Yuemang Yao,<sup>b</sup> Edward Hyde,<sup>b</sup> John Q. Trojanowski,<sup>b</sup> Virginia M.-Y. Lee,<sup>b</sup> and Amos B. Smith, III<sup>a</sup>

<sup>a</sup>Department of Chemistry, School of Arts and Sciences, University of Pennsylvania, 231 South 34th St., Philadelphia, PA 19104-6323; <sup>b</sup>Center for Neurodegenerative Diseases Research, Institute on Aging, University of Pennsylvania, 3600 Spruce Street, Philadelphia, PA 19104-6323

Table of Contents

**S4.** HPLC chromatogram and mass spectra of compound **8**.

**S5.** IR spectra of compound **8**.

**S6.** <sup>1</sup>H NMR spectrum of compound **8**.

**S7.** <sup>13</sup>C NMR spectrum of compound **8**.

**S8.** X-ray crystal structure of compound **8**.

**S9.** HPLC chromatogram and mass spectra of compound **16**.

**S10.** IR spectra of compound **16**.

**S11.** <sup>1</sup>H NMR spectrum of compound **16**.

**S12.** <sup>13</sup>C NMR spectrum of compound **16**.

**S13.** X-ray crystal structure of compound **16**.

**S14.** HPLC chromatogram and mass spectra of compound **11**.

**S15.** IR spectra of compound **11**.

**S16.** <sup>1</sup>H NMR spectrum of compound **11**.

**S17.** <sup>13</sup>C NMR spectrum of compound **11**.

**S18.** HPLC chromatogram and mass spectra of compound **10**.

**S19.** IR spectra of compound **10**.

**S20.**  $^1\text{H}$  NMR spectrum of compound **10**.

**S21.**  $^{13}\text{C}$  NMR spectrum of compound **10**.

**S22.** HPLC chromatogram and mass spectra of compound **13**.

**S23.** IR spectra of compound **13**.

**S24.**  $^1\text{H}$  NMR spectrum of compound **13**.

**S25.**  $^{13}\text{C}$  NMR spectrum of compound **13**.

**S26.** HPLC chromatogram and mass spectra of compound **14**.

**S27.** IR spectra of compound **14**.

**S28.**  $^1\text{H}$  NMR spectrum of compound **14**.

**S29.**  $^{13}\text{C}$  NMR spectrum of compound **14**.

**S30.** HPLC chromatogram and mass spectra of compound **15**.

**S31.** IR spectra of compound **15**.

**S32.**  $^1\text{H}$  NMR spectrum of compound **15**.

**S33.**  $^{13}\text{C}$  NMR spectrum of compound **15**.

**S34.** HPLC chromatogram and mass spectra of compound **17**.

**S35.** IR spectra of compound **17**.

**S36.**  $^1\text{H}$  NMR spectrum of compound **17**.

**S37.**  $^{13}\text{C}$  NMR spectrum of compound **17**.

**S38.** HPLC chromatogram and mass spectra of compound **18**.

**S39.** IR spectra of compound **18**.

**S40.**  $^1\text{H}$  NMR spectrum of compound **18**.

**S41.**  $^{13}\text{C}$  NMR spectrum of compound **18**.

**S42.** HPLC chromatogram and mass spectra of compound **19**.

**S43.** IR spectra of compound **19**.

**S44.**  $^1\text{H}$  NMR spectrum of compound **19**.

**S45.**  $^{13}\text{C}$  NMR spectrum of compound **19**.

**S46.** MT-assembly assay results for compounds **8, 10, 11, 13–19**.

# HPLC chromatogram and mass spectrum of compound 8

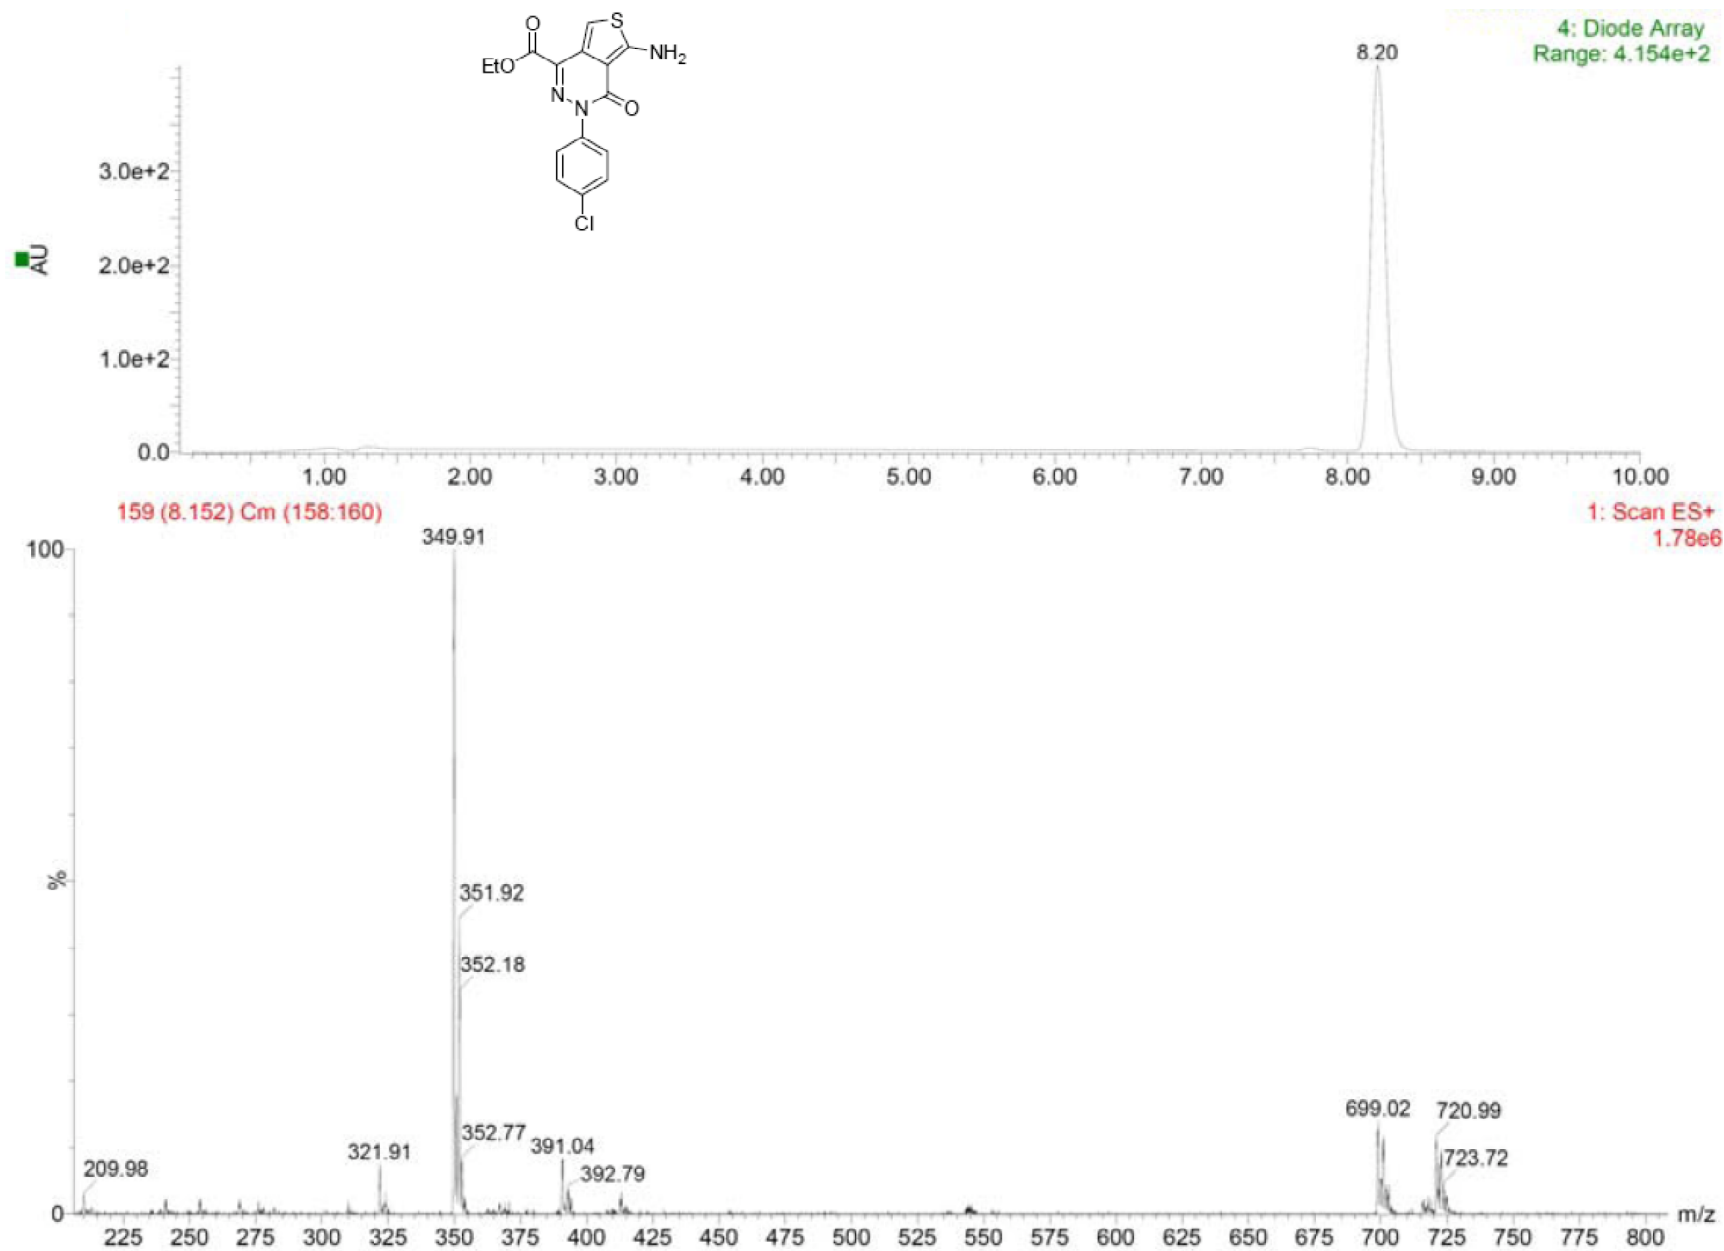

### IR spectrum of compound 8

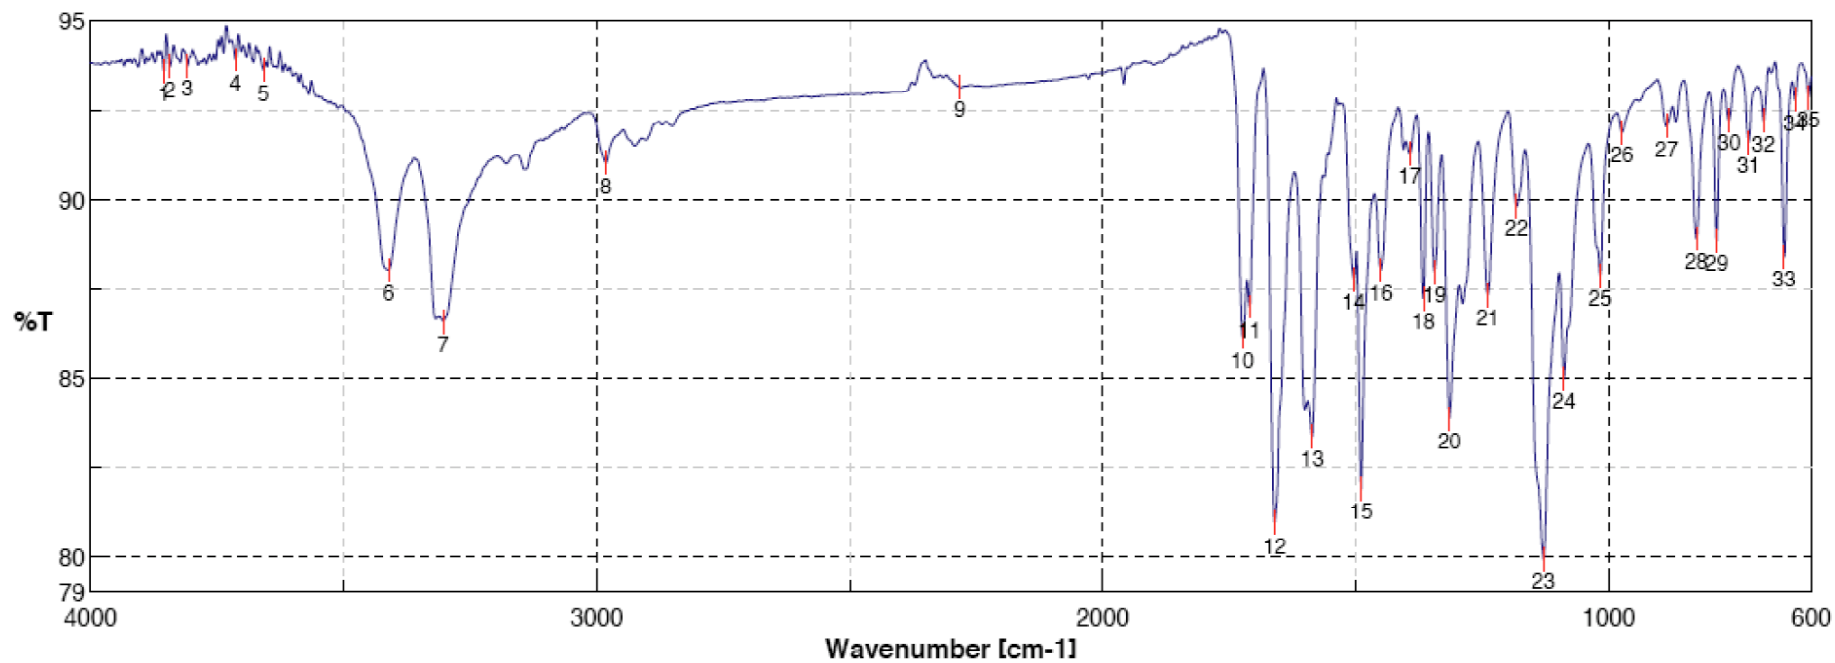

| No. | cm-1    | %T      |
|-----|---------|---------|-----|---------|---------|-----|---------|---------|-----|---------|---------|-----|---------|---------|
| 1   | 3855.01 | 93.6296 | 2   | 3843.43 | 93.7439 | 3   | 3808.72 | 93.756  | 4   | 3713.26 | 93.9336 | 5   | 3658.3  | 93.6455 |
| 6   | 3411.46 | 88.0237 | 7   | 3303.46 | 86.5911 | 8   | 2981.41 | 91.0351 | 9   | 2281.38 | 93.1611 | 10  | 1724.05 | 86.1593 |
| 11  | 1709.59 | 86.9852 | 12  | 1660.41 | 80.9304 | 13  | 1586.16 | 83.3675 | 14  | 1504.2  | 87.746  | 15  | 1489.74 | 81.8849 |
| 16  | 1450.21 | 88.0253 | 17  | 1393.32 | 91.2954 | 18  | 1366.32 | 87.2297 | 19  | 1344.14 | 87.9672 | 20  | 1315.21 | 83.8797 |
| 21  | 1239.04 | 87.3142 | 22  | 1182.15 | 89.814  | 23  | 1129.12 | 79.902  | 24  | 1088.62 | 84.9899 | 25  | 1017.27 | 87.8684 |
| 26  | 973.876 | 91.8987 | 27  | 886.131 | 92.0635 | 28  | 827.312 | 88.9066 | 29  | 786.815 | 88.8374 | 30  | 762.709 | 92.2281 |
| 31  | 724.139 | 91.6119 | 32  | 694.248 | 92.2158 | 33  | 653.75  | 88.3903 | 34  | 632.537 | 92.8119 | 35  | 605.539 | 92.8999 |

<sup>1</sup>H NMR spectrum of compound **8**

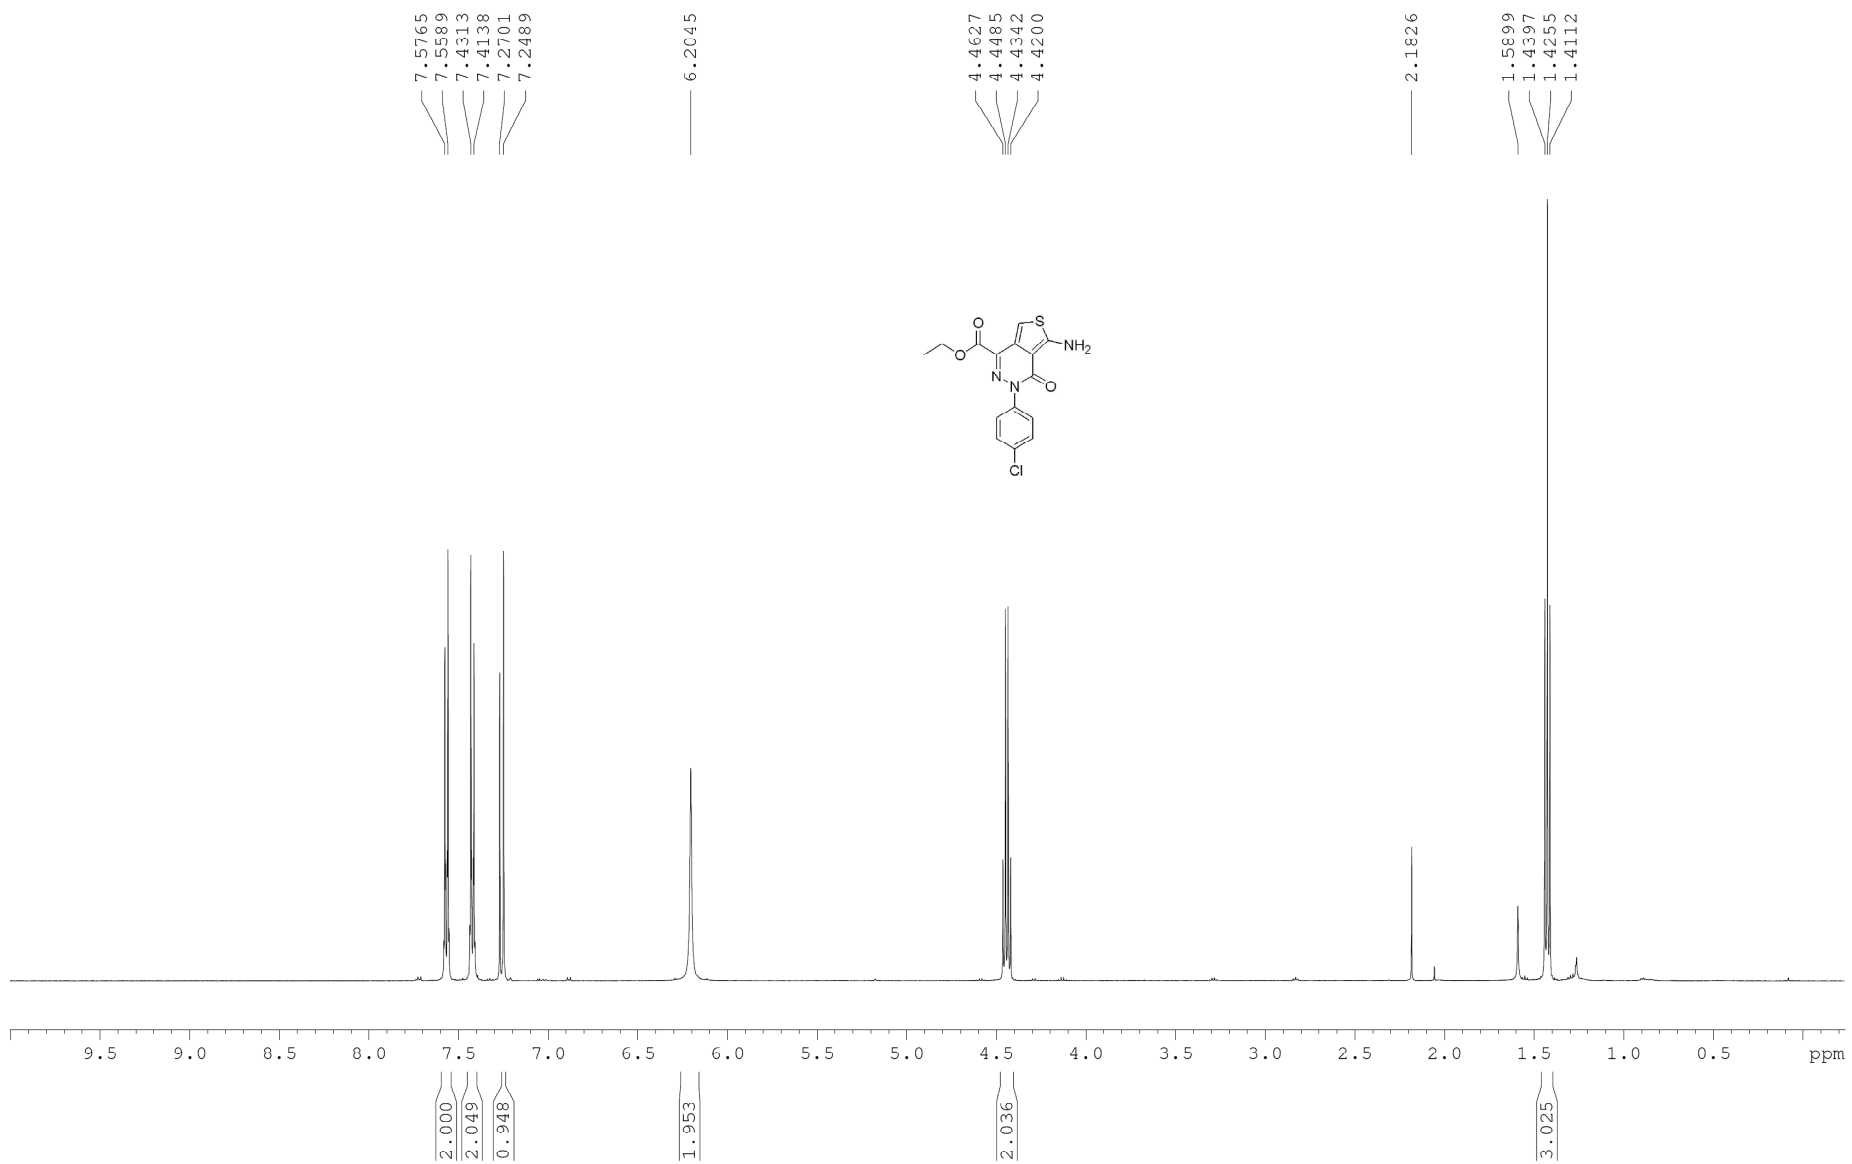

<sup>13</sup>C NMR spectrum of compound **8**

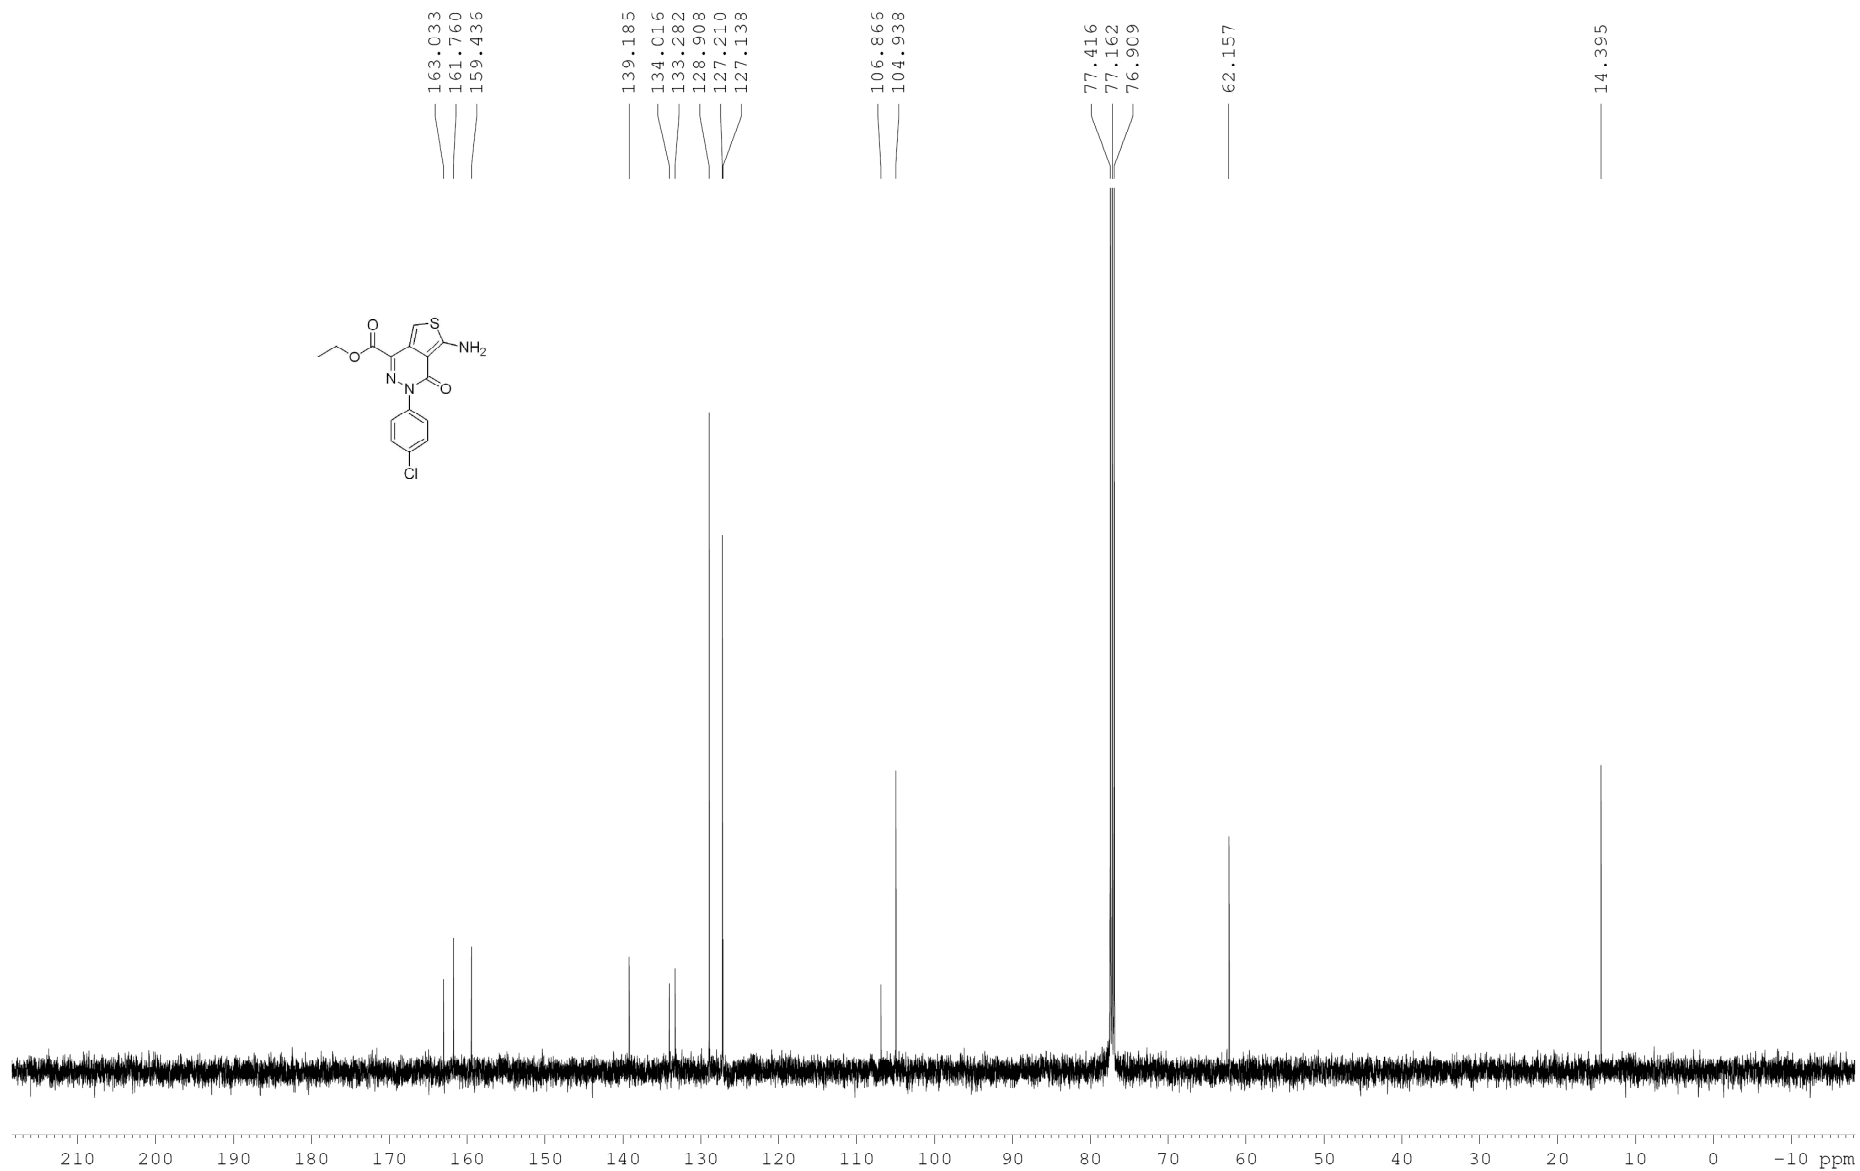

X-ray crystal structure of compound **8** (CCDC 763542)

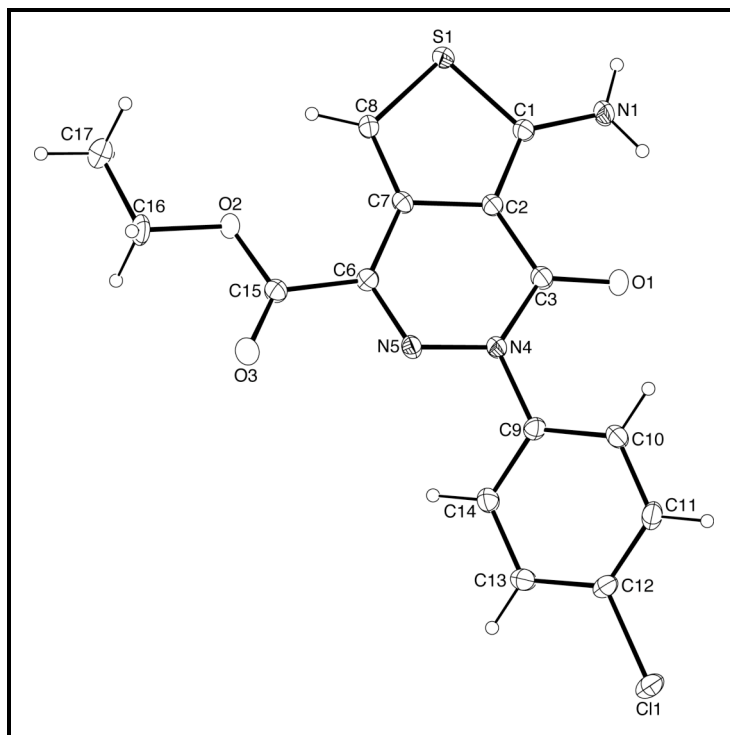



# HPLC chromatogram and mass spectrum of compound 16

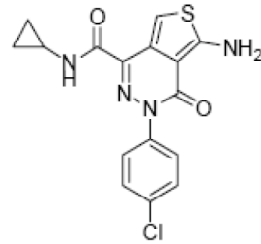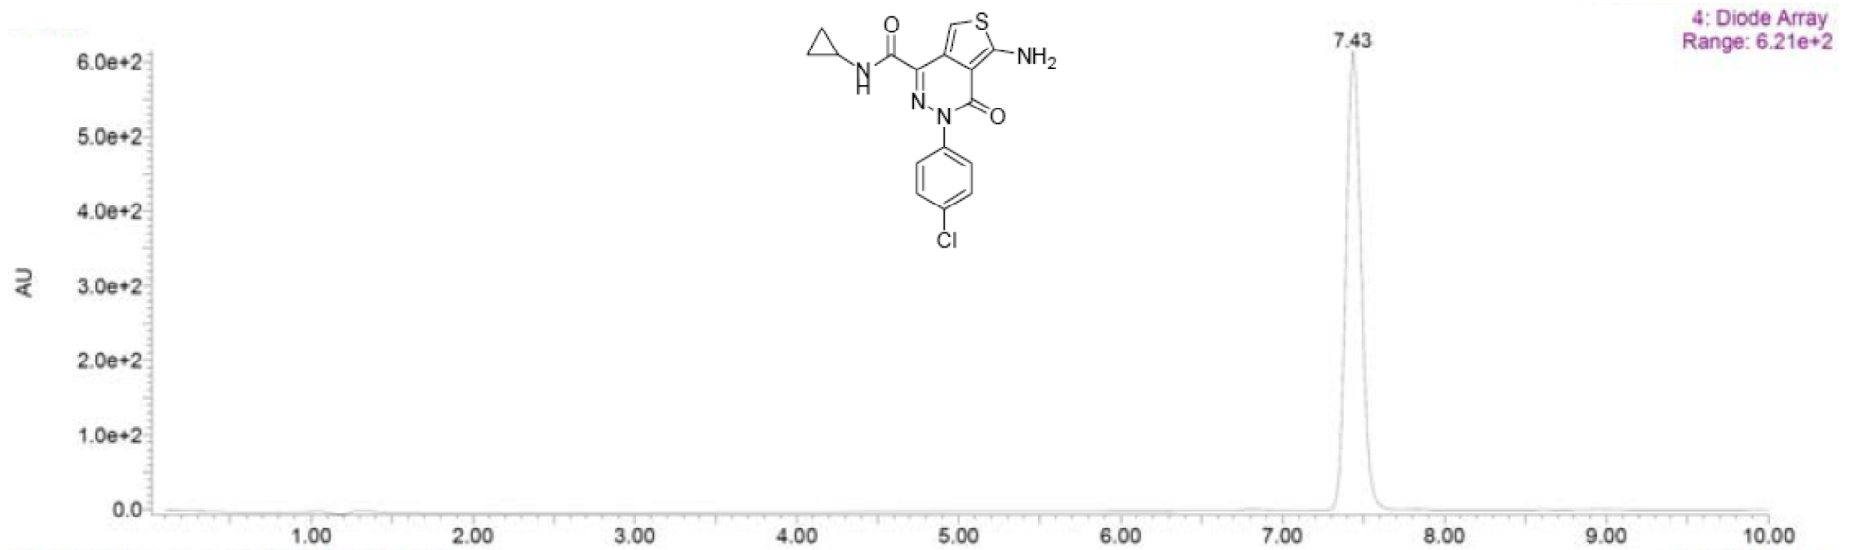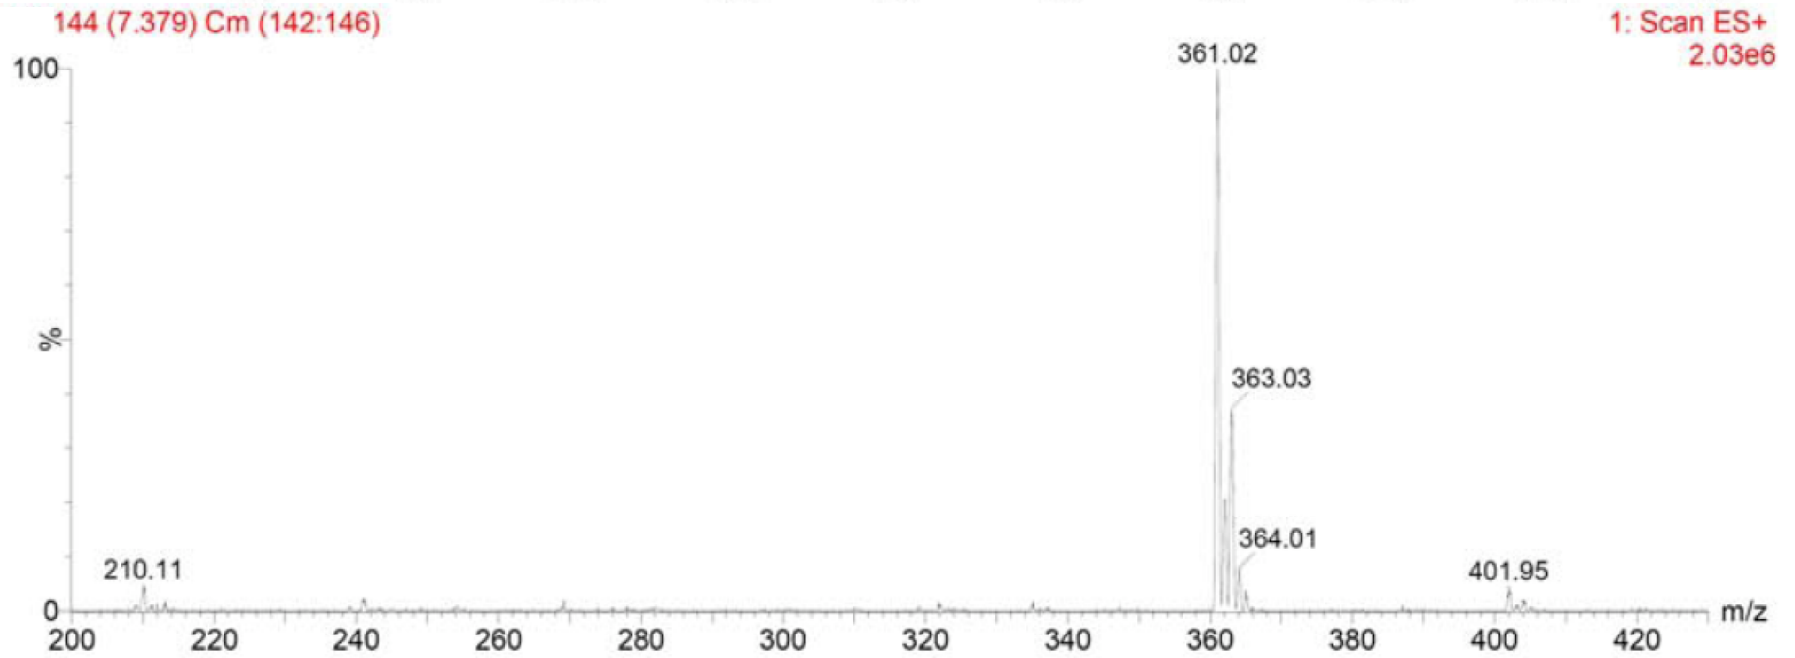

### IR spectrum of compound 16

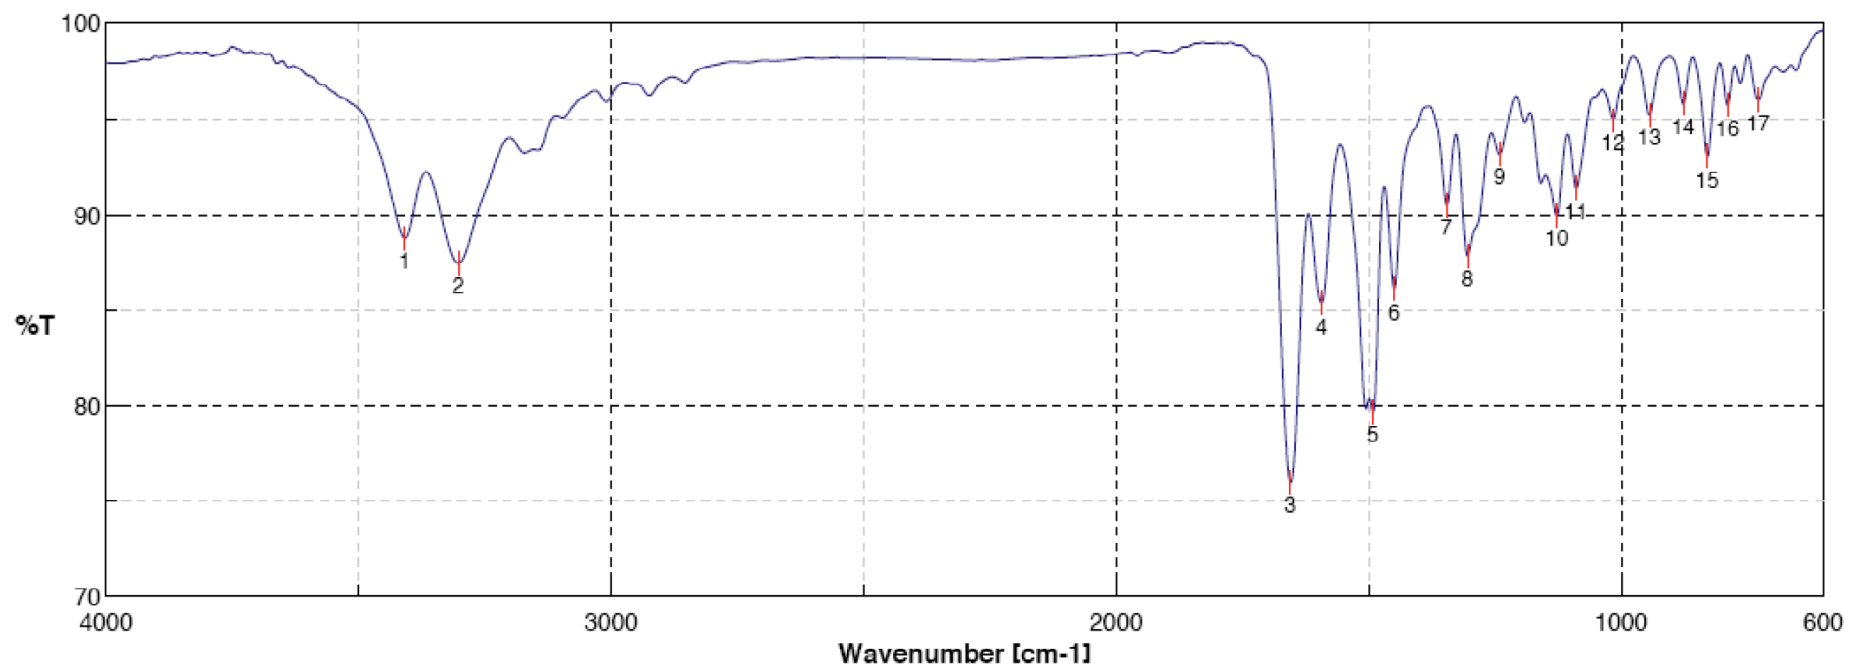

| No. | cm-1    | %T      |
|-----|---------|---------|-----|---------|---------|-----|---------|---------|-----|---------|---------|
| 1   | 3408.57 | 88.717  | 2   | 3302.5  | 87.4323 | 3   | 1654.62 | 75.9592 | 4   | 1593.4  | 85.3621 |
| 6   | 1449.73 | 86.0946 | 7   | 1345.59 | 90.4801 | 8   | 1304.61 | 87.8093 | 9   | 1240.97 | 93.1338 |
| 11  | 1089.58 | 91.3594 | 12  | 1015.82 | 94.9526 | 13  | 944.467 | 95.2184 | 14  | 877.452 | 95.792  |
| 16  | 789.707 | 95.7074 | 17  | 728.961 | 95.9858 |     |         |         | 15  | 829.723 | 93.0352 |

<sup>1</sup>H NMR spectrum of compound **16**

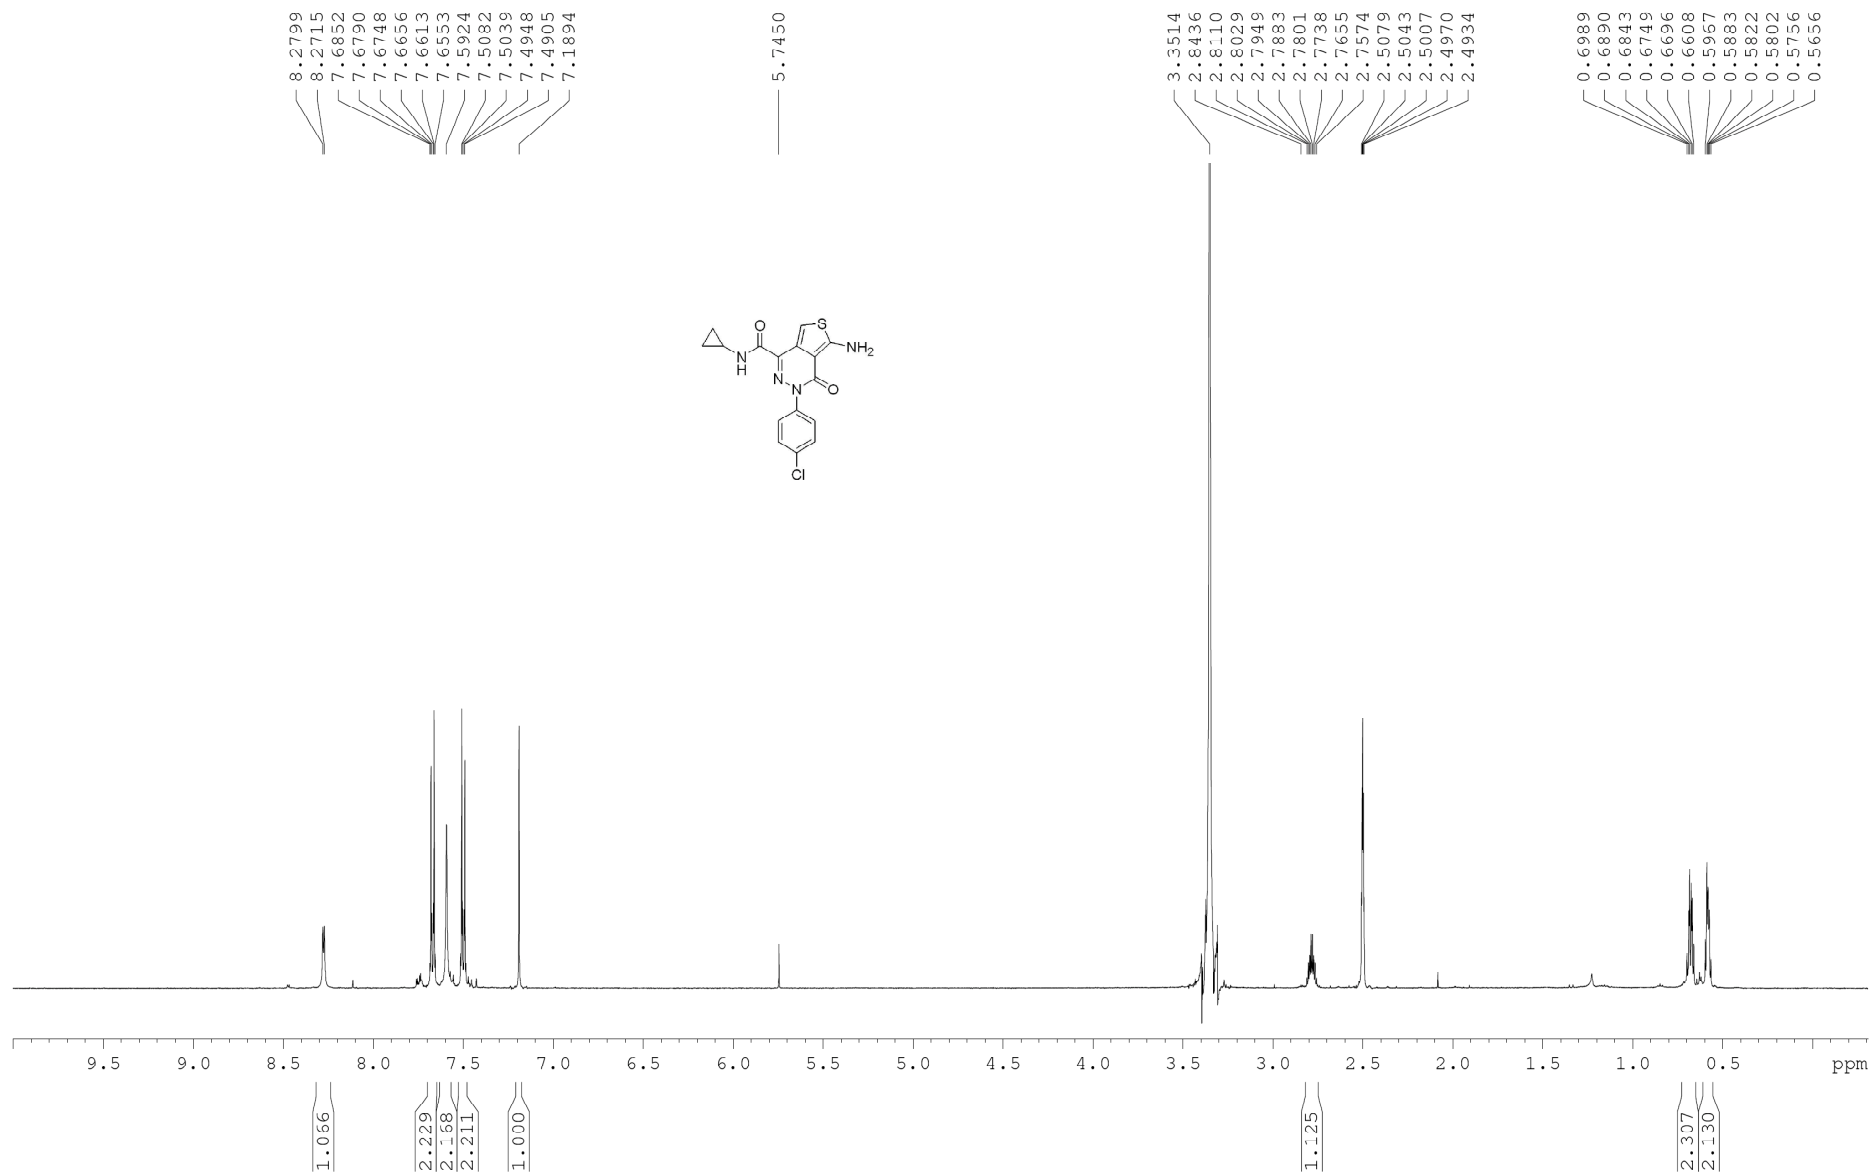

<sup>13</sup>C NMR spectrum of compound **16**

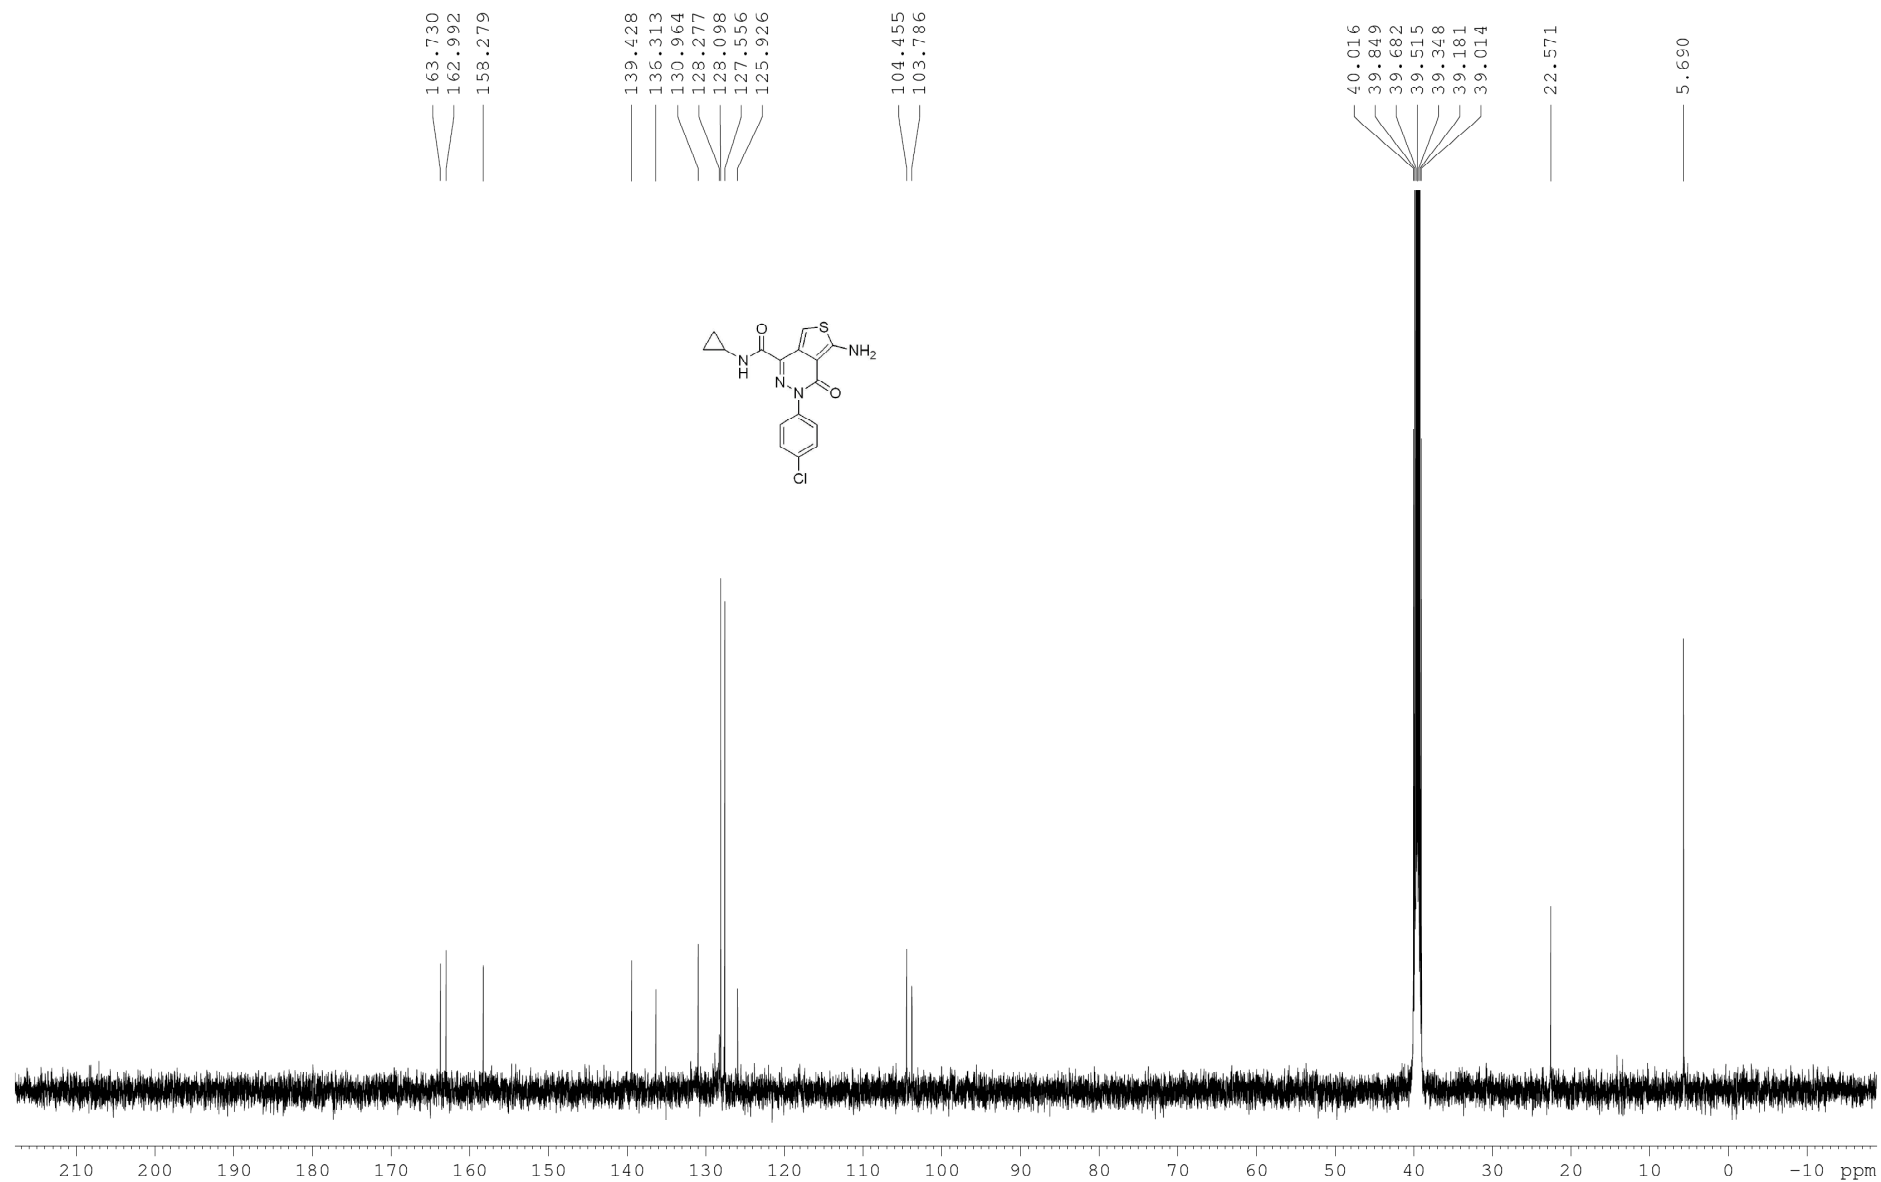

X-ray crystal structure of compound **16** (CCDC 763541)

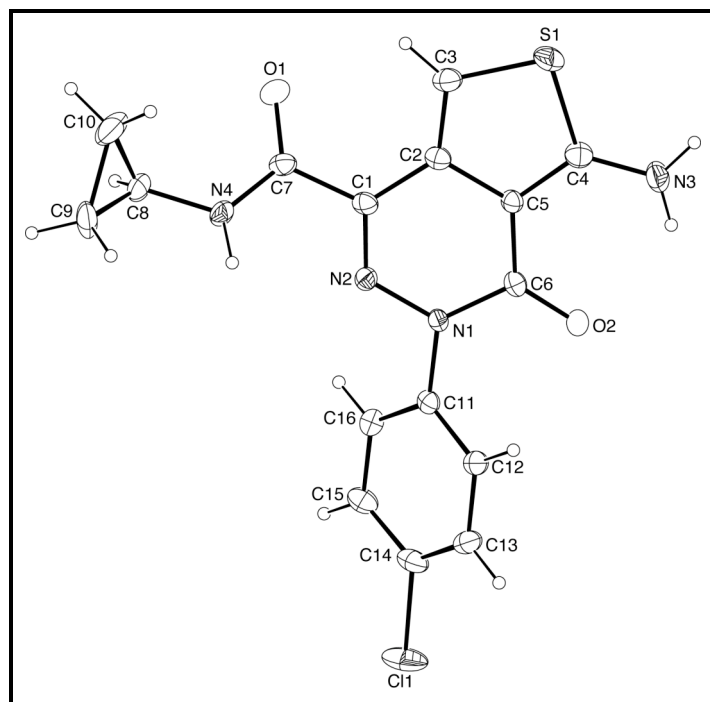

# HPLC chromatogram and mass spectrum of compound **11**

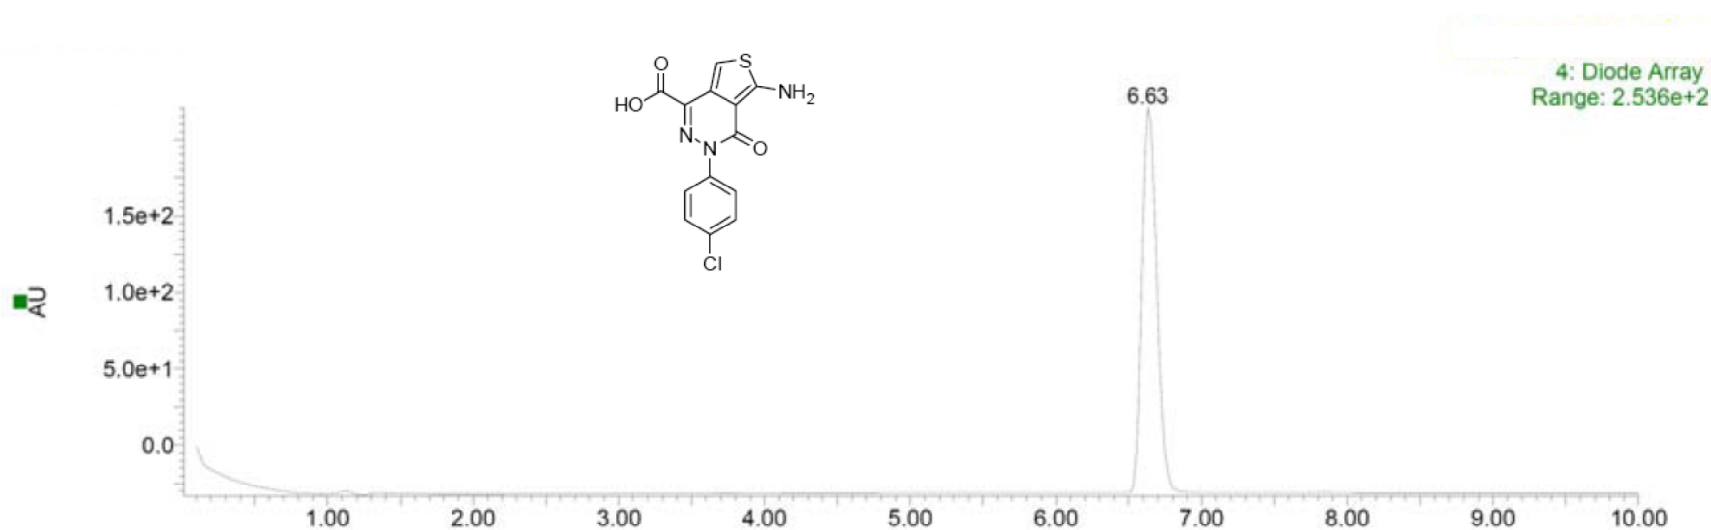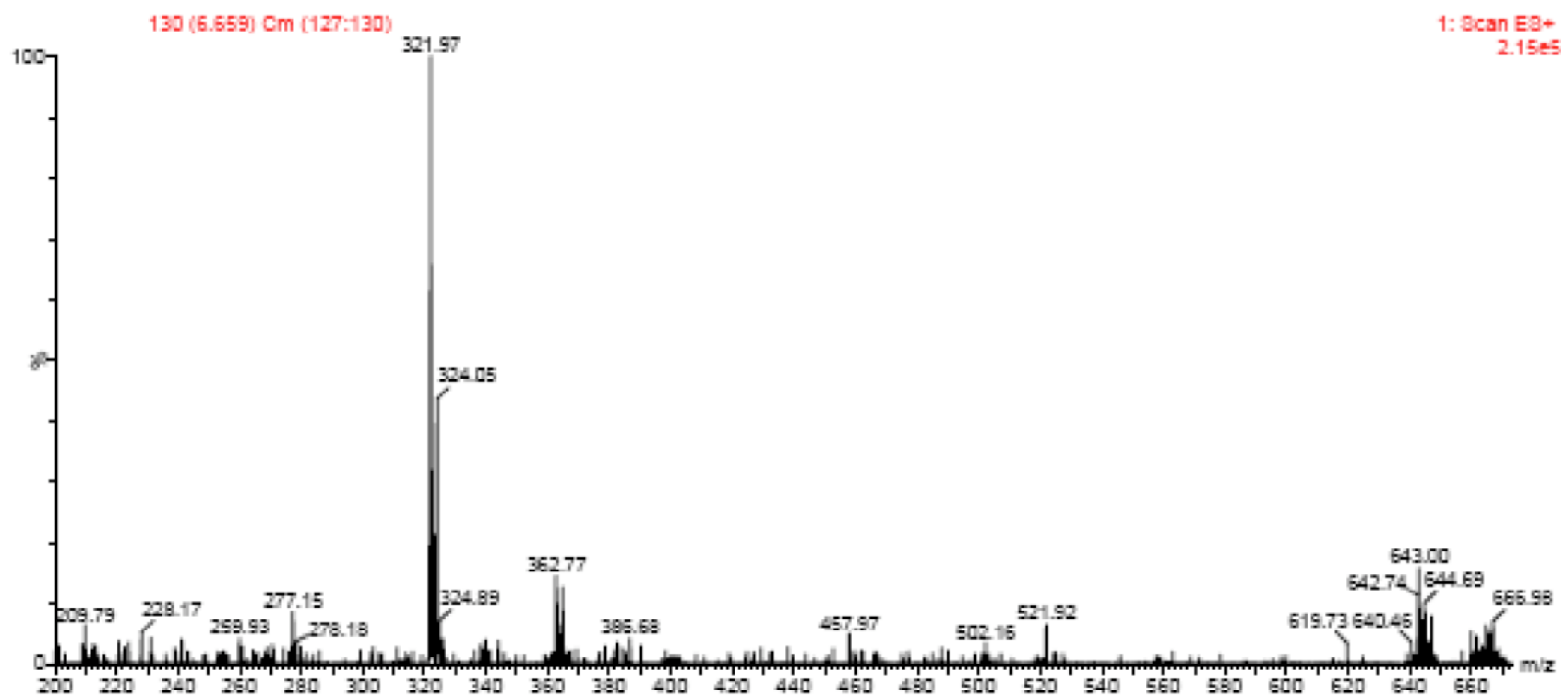

### IR spectrum of compound 11

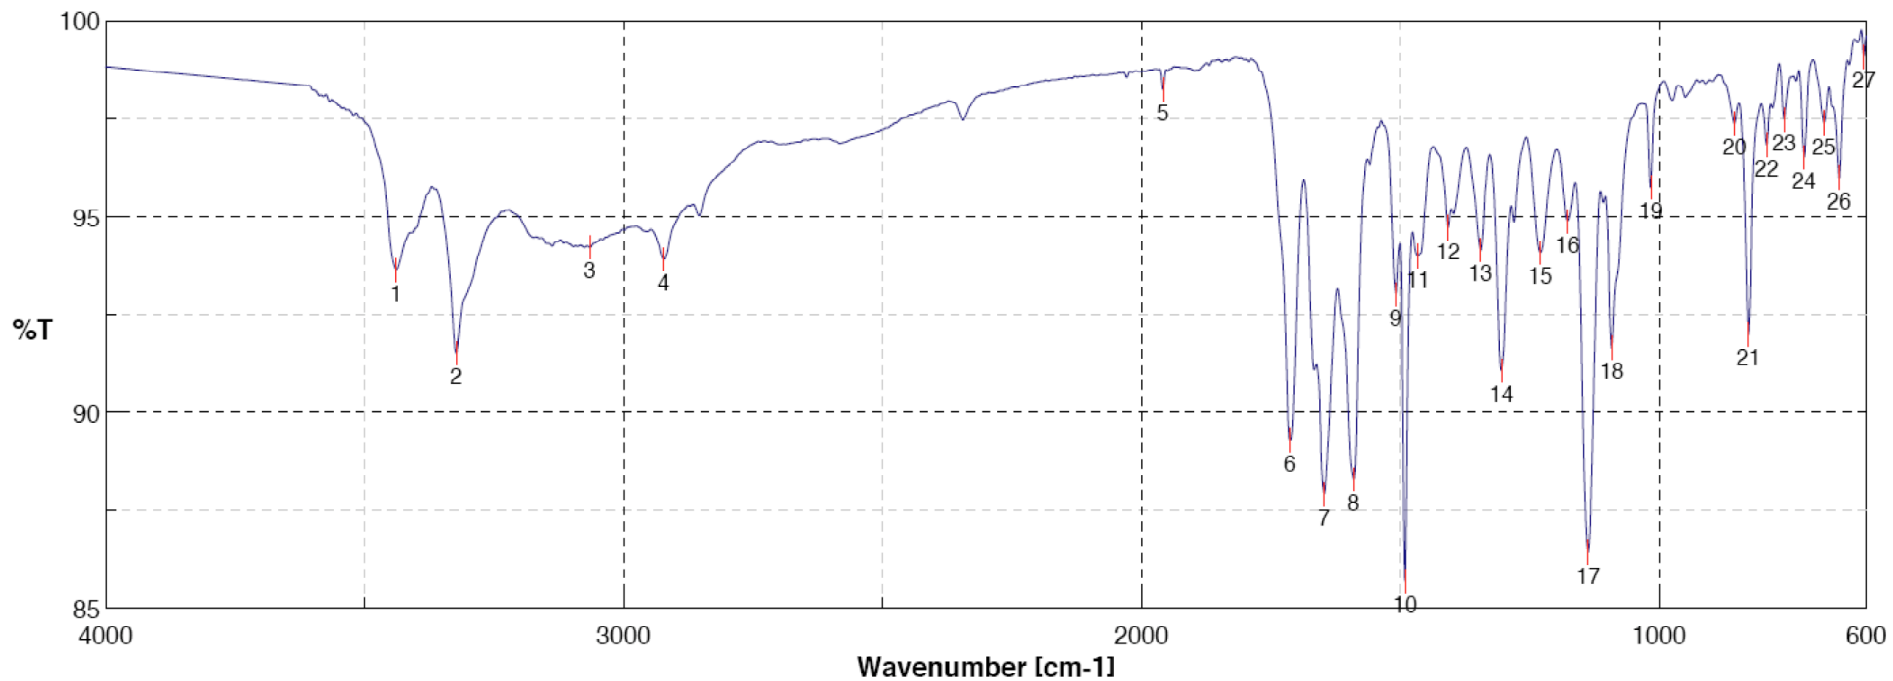

| No. | cm-1    | %T      |
|-----|---------|---------|-----|---------|---------|-----|---------|---------|-----|---------|---------|-----|---------|---------|
| 1   | 3439.42 | 93.6432 | 2   | 3322.75 | 91.5133 | 3   | 3065.3  | 94.2198 | 4   | 2921.63 | 93.9143 | 5   | 1958.36 | 98.2408 |
| 6   | 1712.48 | 89.2896 | 7   | 1646.91 | 87.9232 | 8   | 1590.02 | 88.302  | 9   | 1508.06 | 93.0202 | 10  | 1490.7  | 85.6871 |
| 11  | 1465.63 | 93.9893 | 12  | 1407.78 | 94.7268 | 13  | 1345.11 | 94.1498 | 14  | 1304.61 | 91.0695 | 15  | 1229.4  | 94.0942 |
| 16  | 1177.33 | 94.8926 | 17  | 1136.83 | 86.4373 | 18  | 1091.51 | 91.646  | 19  | 1016.3  | 95.7438 | 20  | 854.311 | 97.3776 |
| 21  | 827.312 | 91.9981 | 22  | 792.6   | 96.8312 | 23  | 758.852 | 97.4834 | 24  | 720.282 | 96.5123 | 25  | 681.713 | 97.3933 |
| 26  | 652.786 | 95.9792 | 27  | 604.574 | 99.077  |     |         |         |     |         |         |     |         |         |

<sup>1</sup>H NMR spectrum of compound **11**

7.591  
7.573  
7.455  
7.437  
7.185

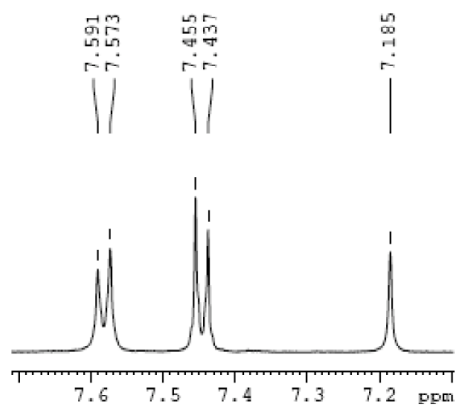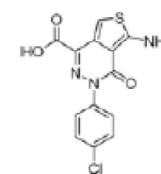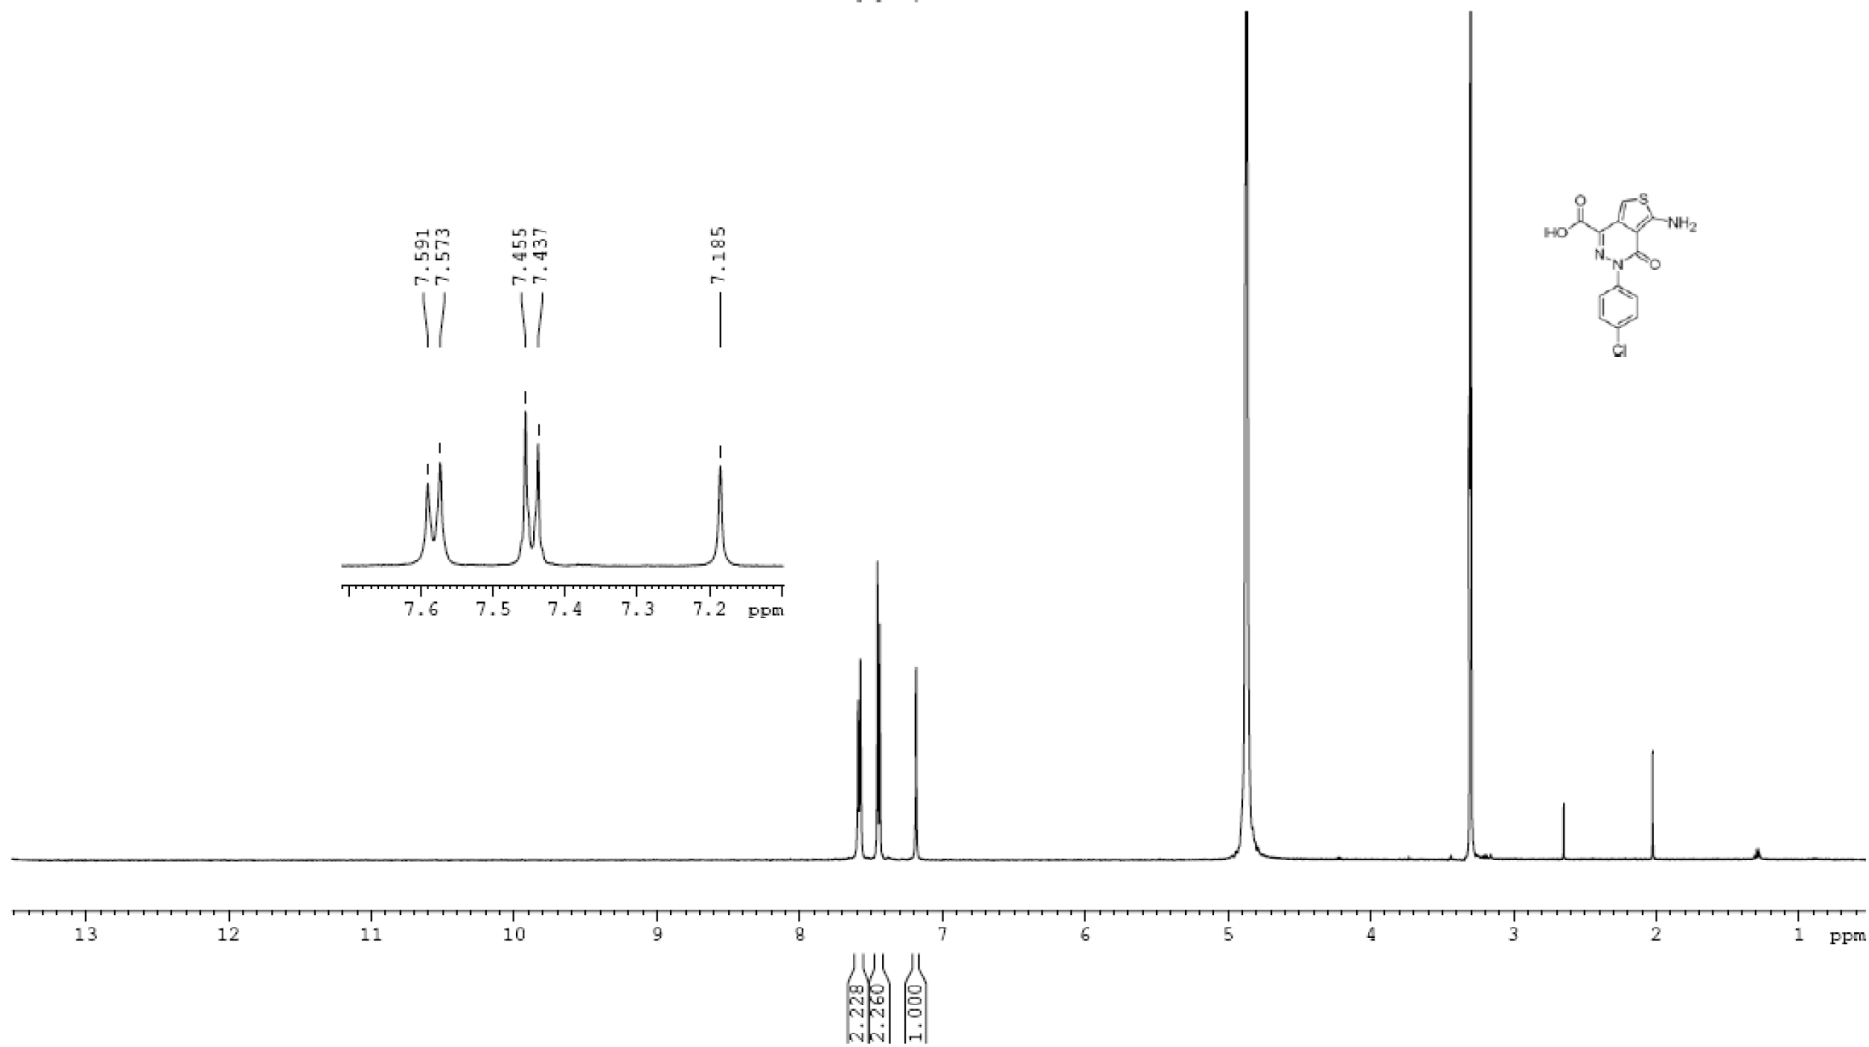



<sup>13</sup>C NMR spectrum of compound **11**

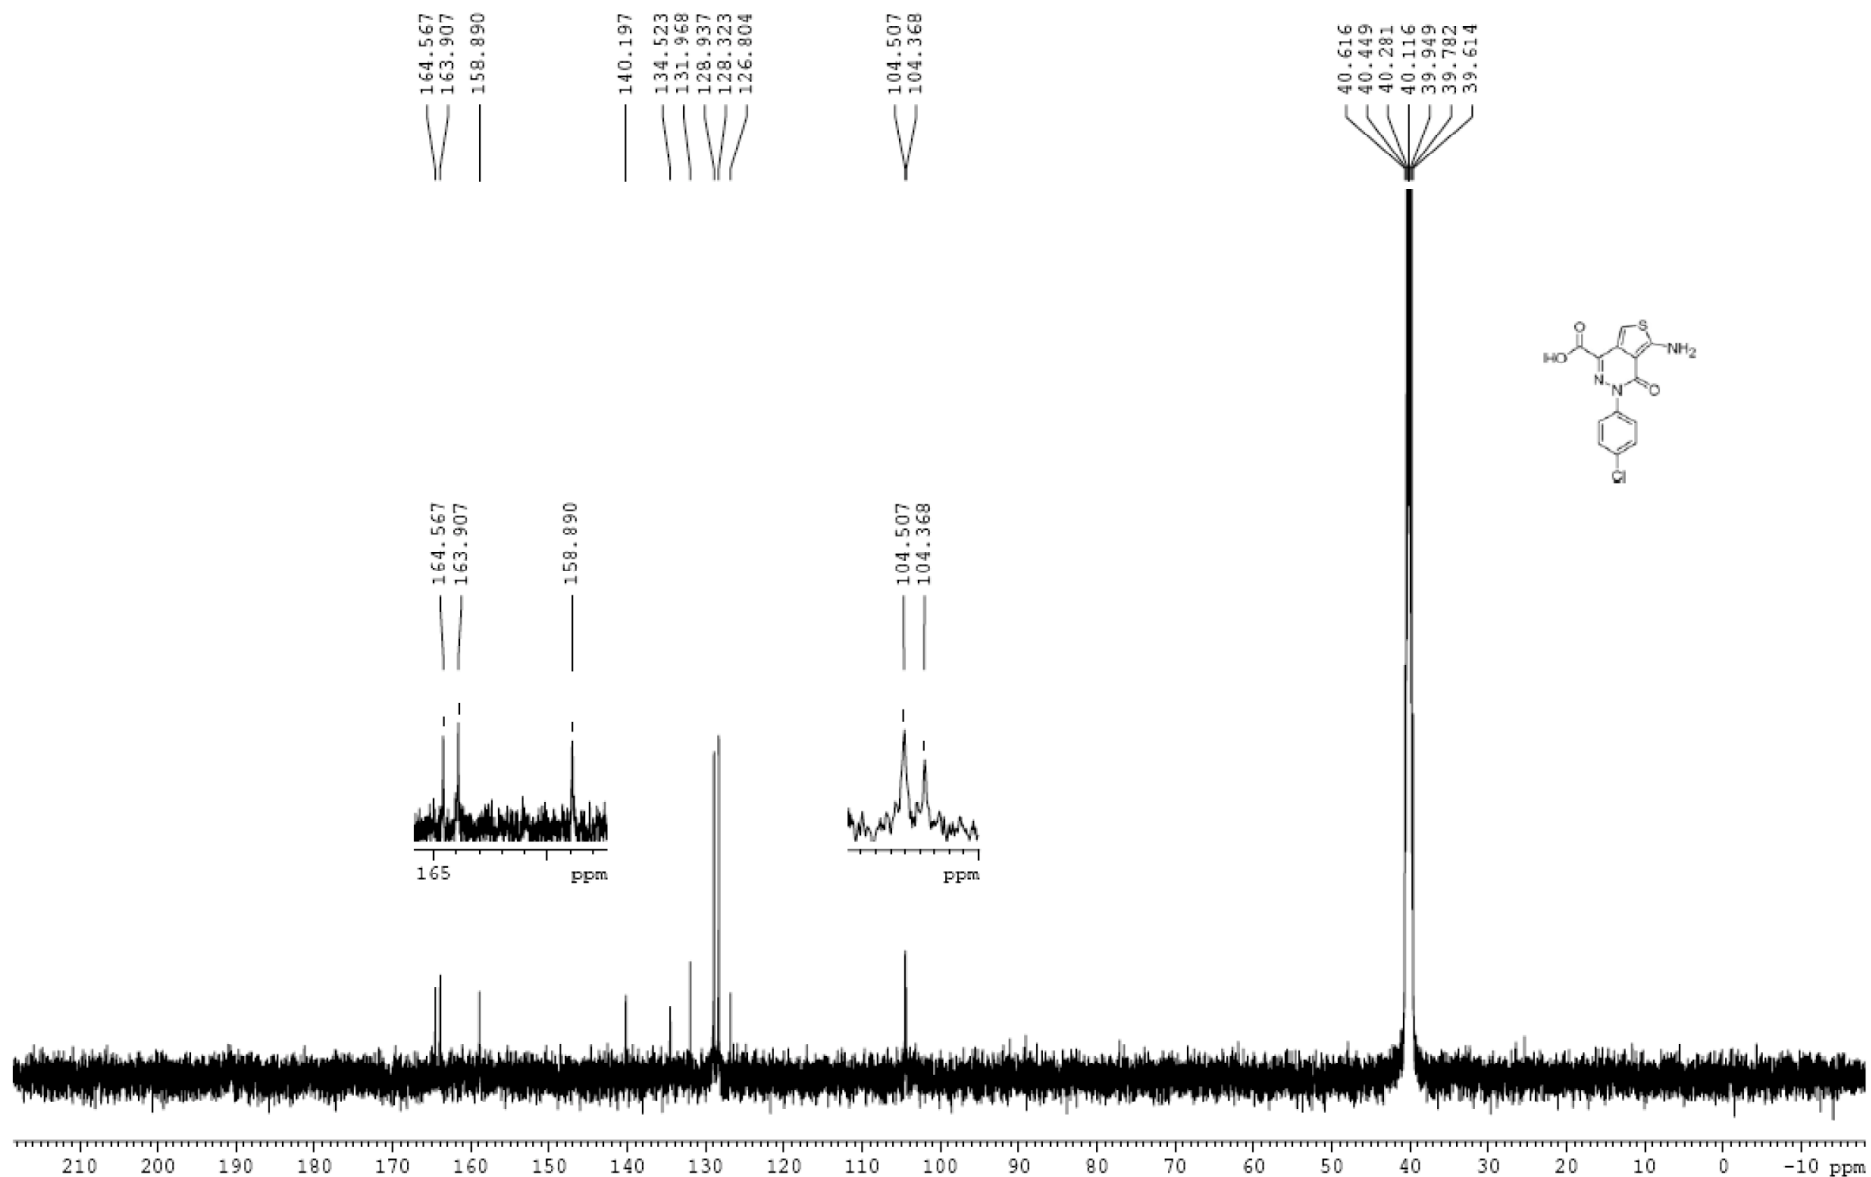

# HPLC chromatogram and mass spectrum of compound 10

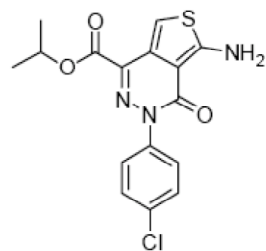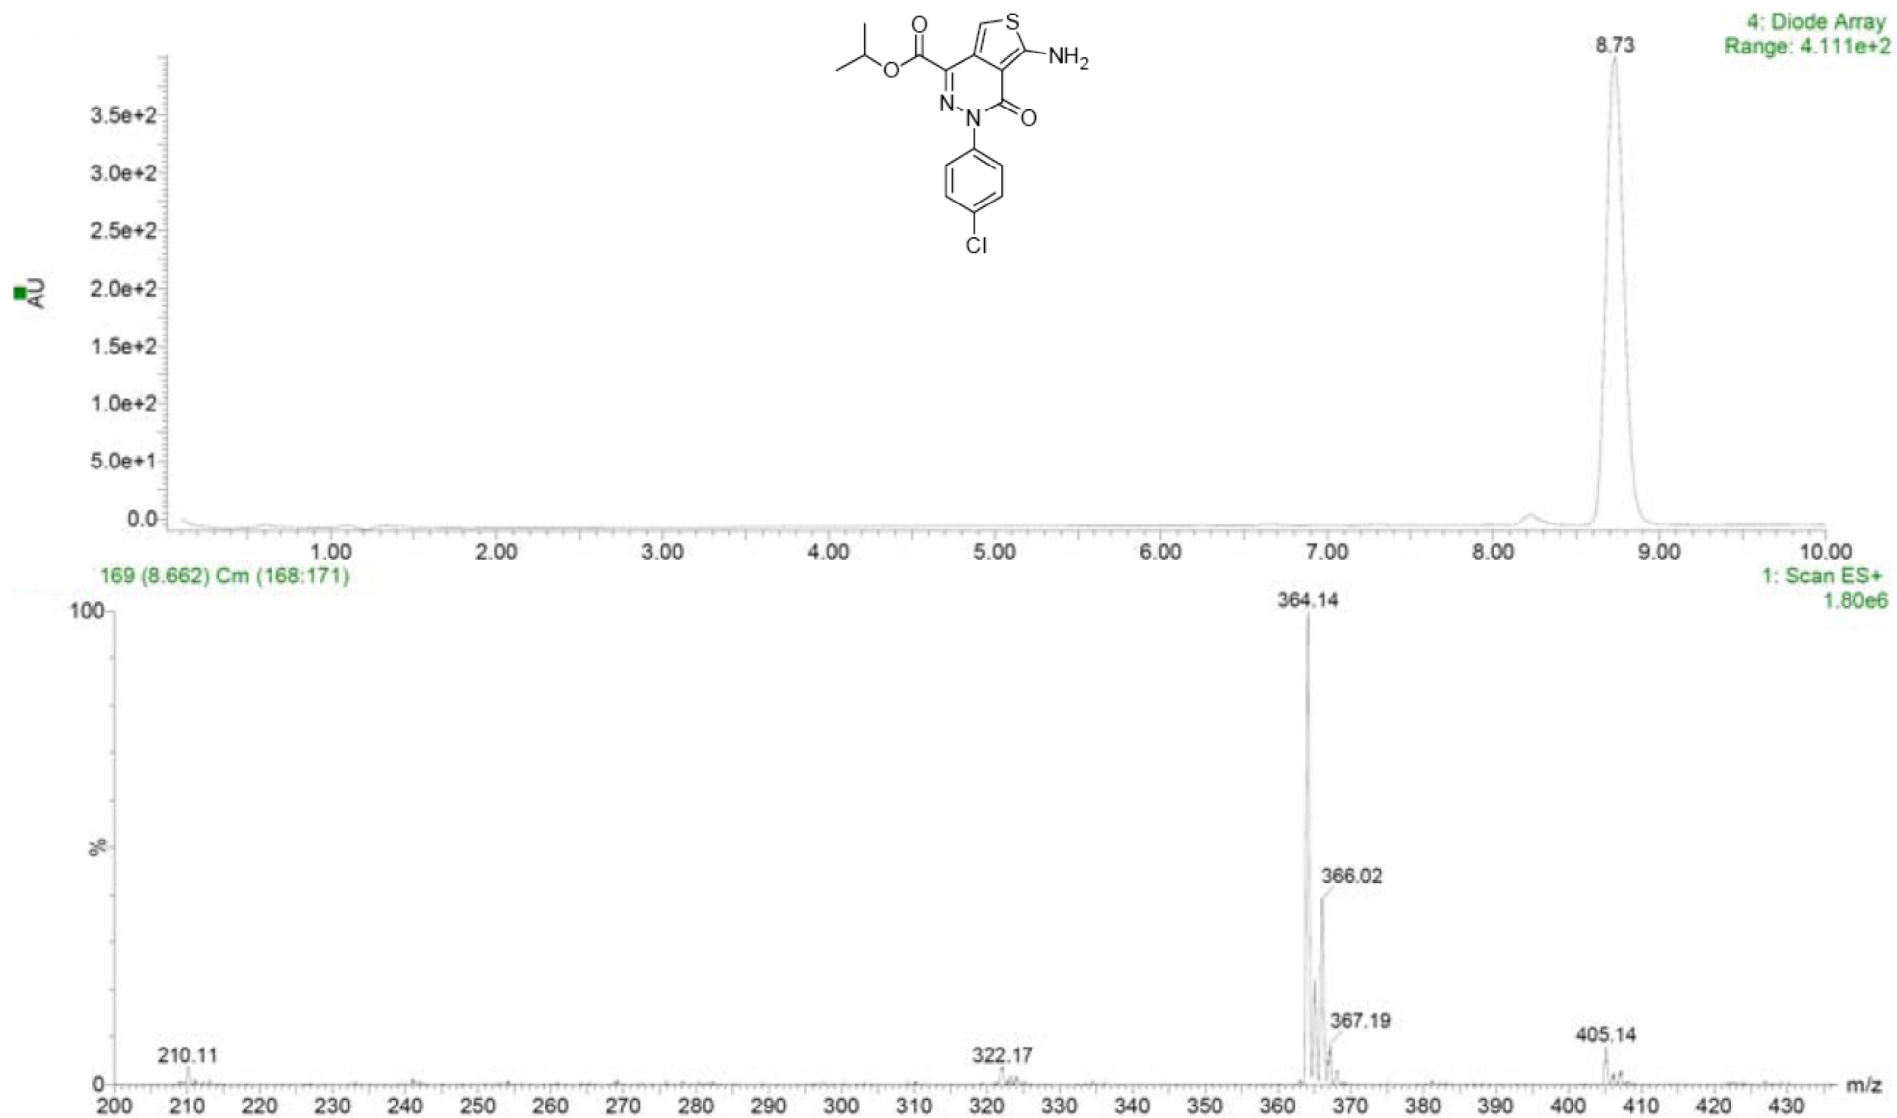

### IR spectrum of compound 10

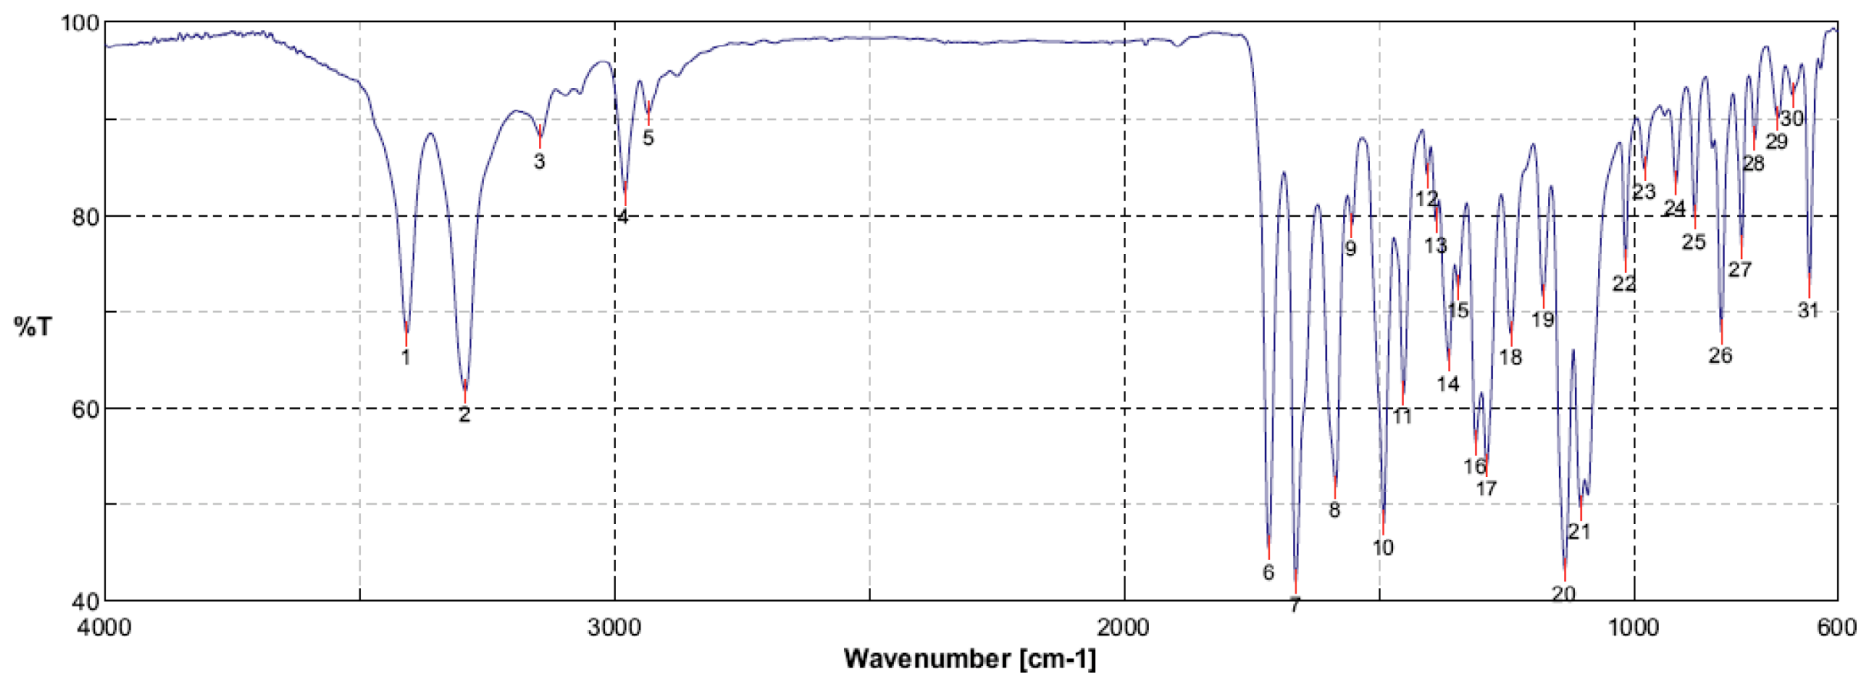

| No. | cm-1    | %T      |    |         |         |
|-----|---------|---------|-----|---------|---------|-----|---------|---------|-----|---------|---------|----|---------|---------|
| 1   | 3408.57 | 67.6885 | 2   | 3294.3  | 61.7655 | 3   | 3145.81 | 88.1026 | 4   | 2980.45 | 82.245  | 5  | 2934.64 | 90.5034 |
| 6   | 1716.82 | 45.3832 | 7   | 1663.78 | 41.9591 | 8   | 1585.2  | 51.791  | 9   | 1553.86 | 78.97   | 10 | 1491.19 | 47.9724 |
| 11  | 1452.14 | 61.4939 | 12  | 1405.85 | 84.1903 | 13  | 1388.5  | 79.4188 | 14  | 1363.91 | 64.9597 | 15 | 1344.62 | 72.4547 |
| 16  | 1310.39 | 56.4469 | 17  | 1288.7  | 54.0629 | 18  | 1241.45 | 67.6539 | 19  | 1178.29 | 71.578  | 20 | 1135.38 | 43.1684 |
| 21  | 1104.53 | 49.5966 | 22  | 1016.3  | 75.2488 | 23  | 979.179 | 84.8188 | 24  | 917.468 | 83.2697 | 25 | 880.345 | 79.7425 |
| 26  | 828.277 | 67.9027 | 27  | 788.743 | 76.7616 | 28  | 762.709 | 87.8938 | 29  | 717.39  | 90.0555 | 30 | 688.945 | 92.3784 |
| 31  | 655.197 | 72.5708 |     |         |         |     |         |         |     |         |         |    |         |         |

<sup>1</sup>H NMR spectrum of compound **10**

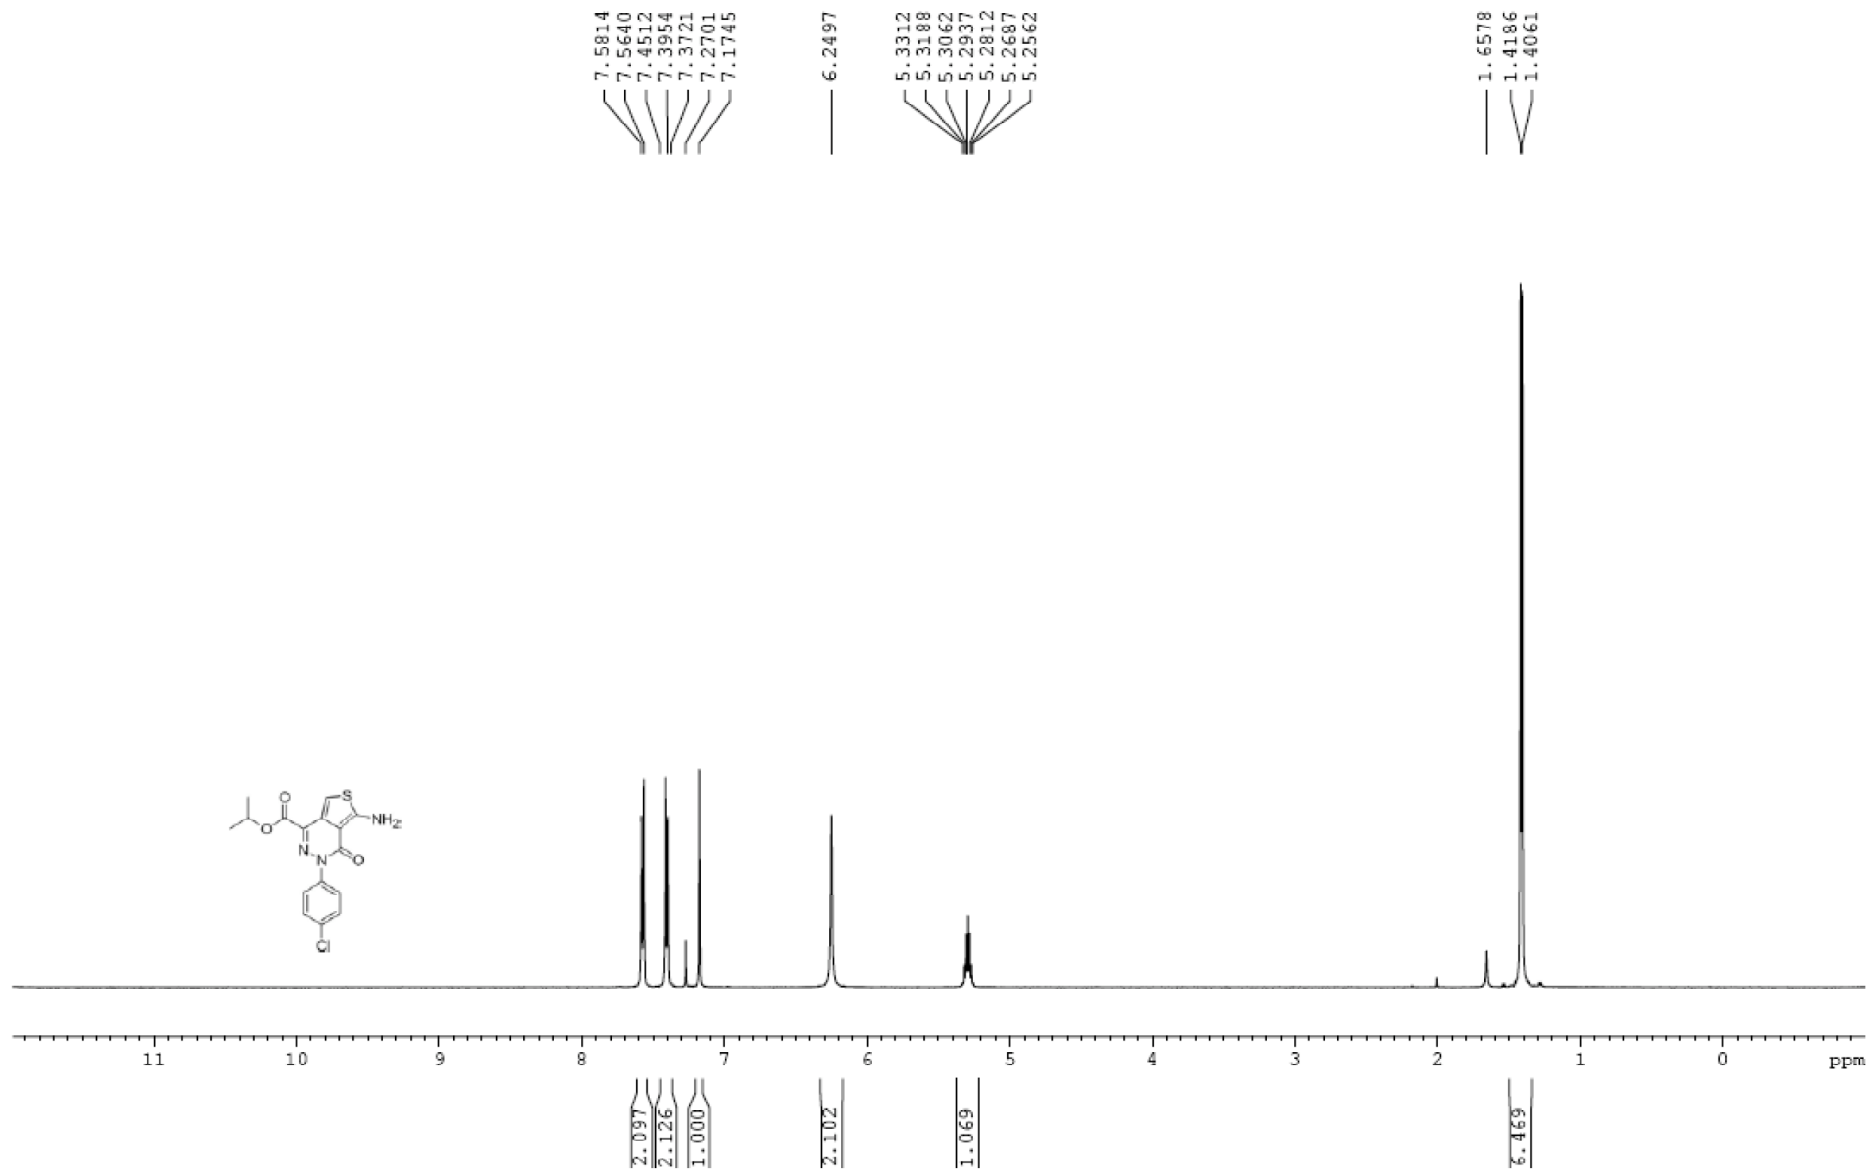

<sup>13</sup>C NMR spectrum of compound **10**

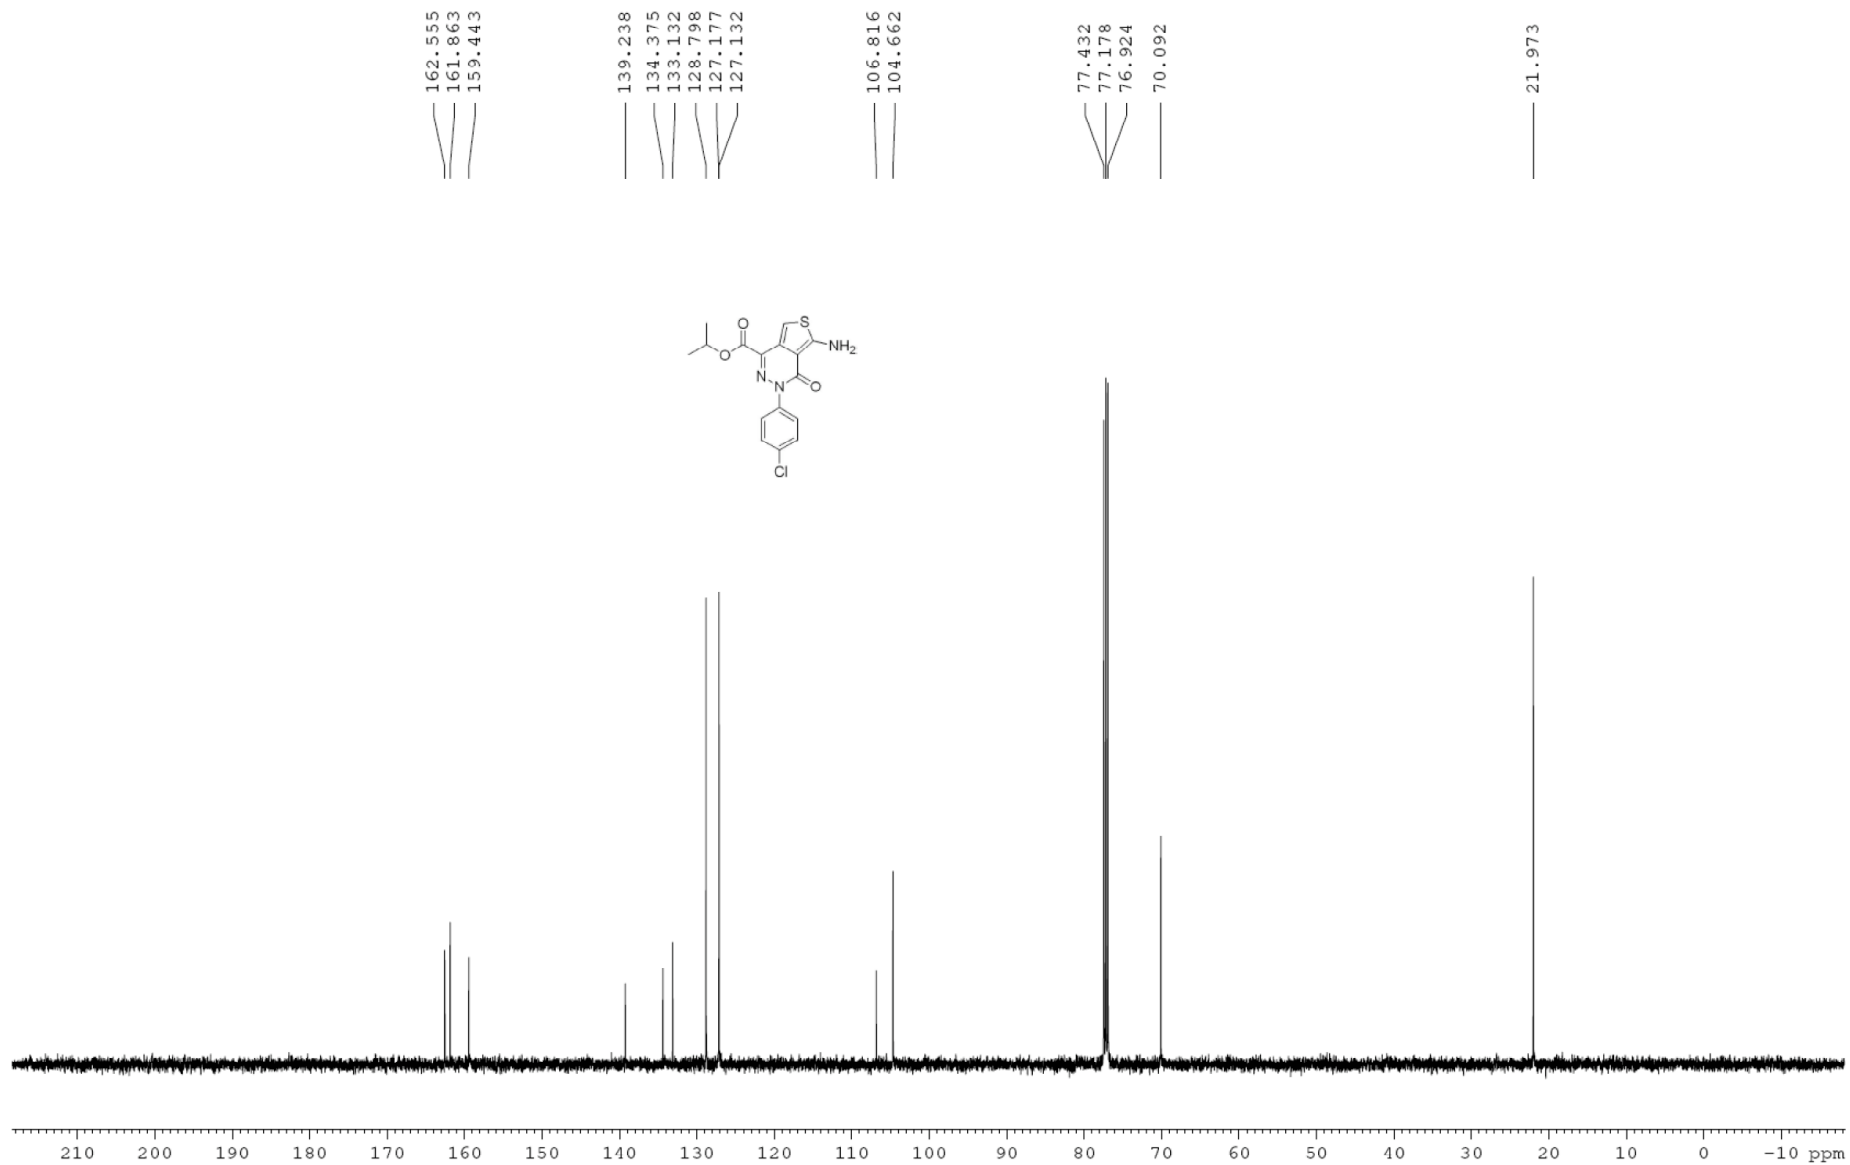

# HPLC chromatogram and mass spectrum of compound 13

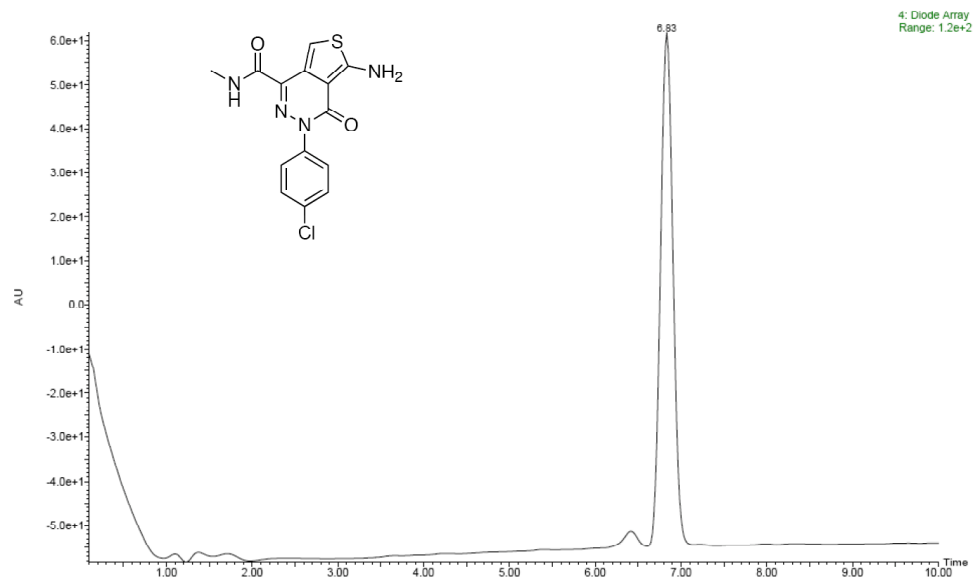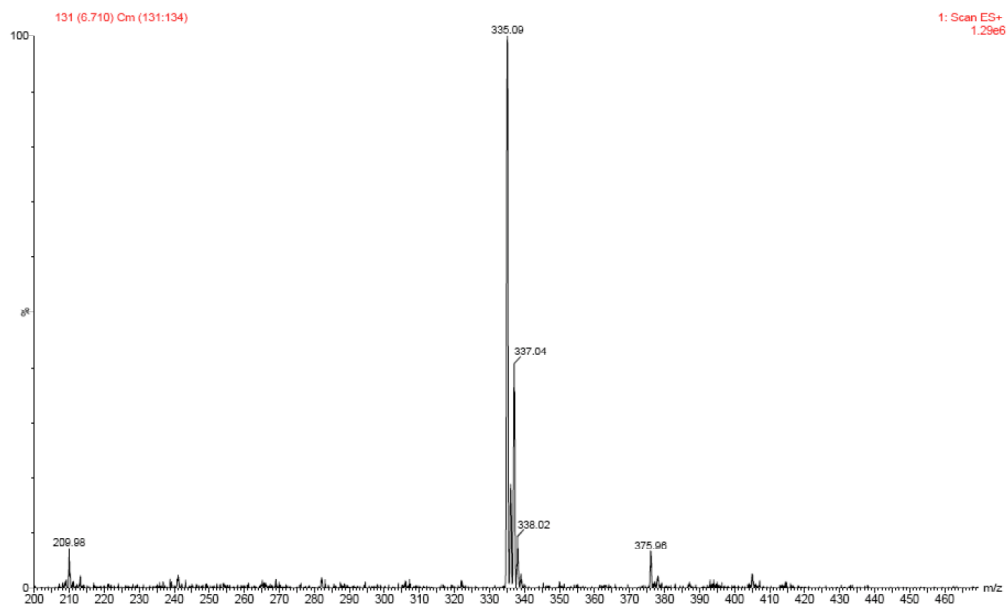

IR spectrum of compound **13**

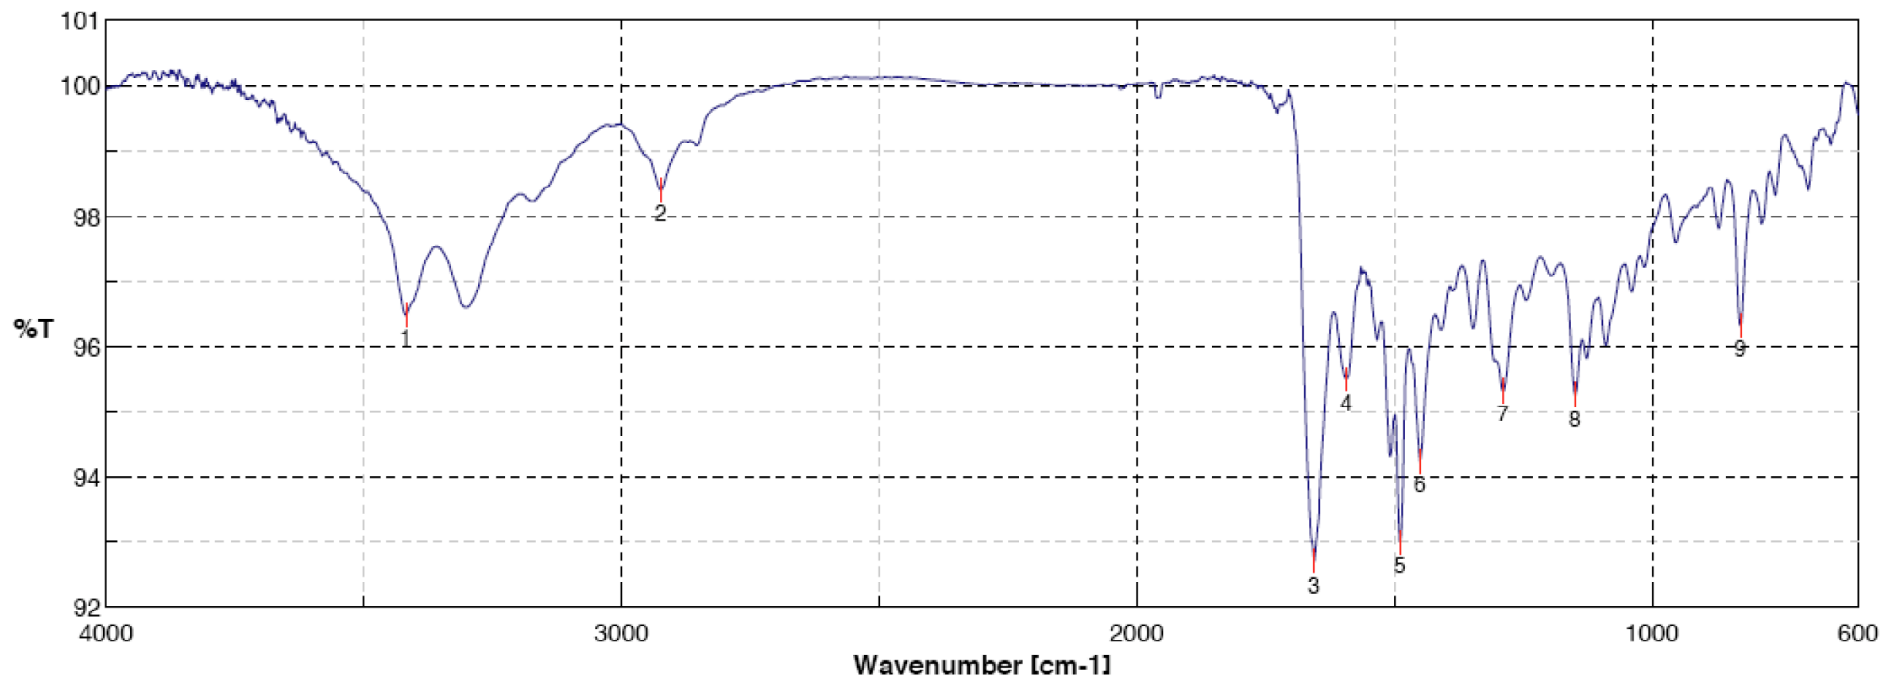

| No. | cm-1    | %T      | No. | cm-1    | %T     |
|-----|---------|---------|-----|---------|---------|-----|---------|---------|-----|---------|---------|-----|---------|--------|
| 1   | 3418.69 | 96.4811 | 2   | 2924.04 | 98.3931 | 3   | 1656.07 | 92.6963 | 4   | 1593.4  | 95.4933 | 5   | 1488.78 | 92.999 |
| 6   | 1450.21 | 94.236  | 7   | 1289.18 | 95.3136 | 8   | 1149.37 | 95.2522 | 9   | 828.759 | 96.3135 |     |         |        |

<sup>1</sup>H NMR spectrum of compound **13**

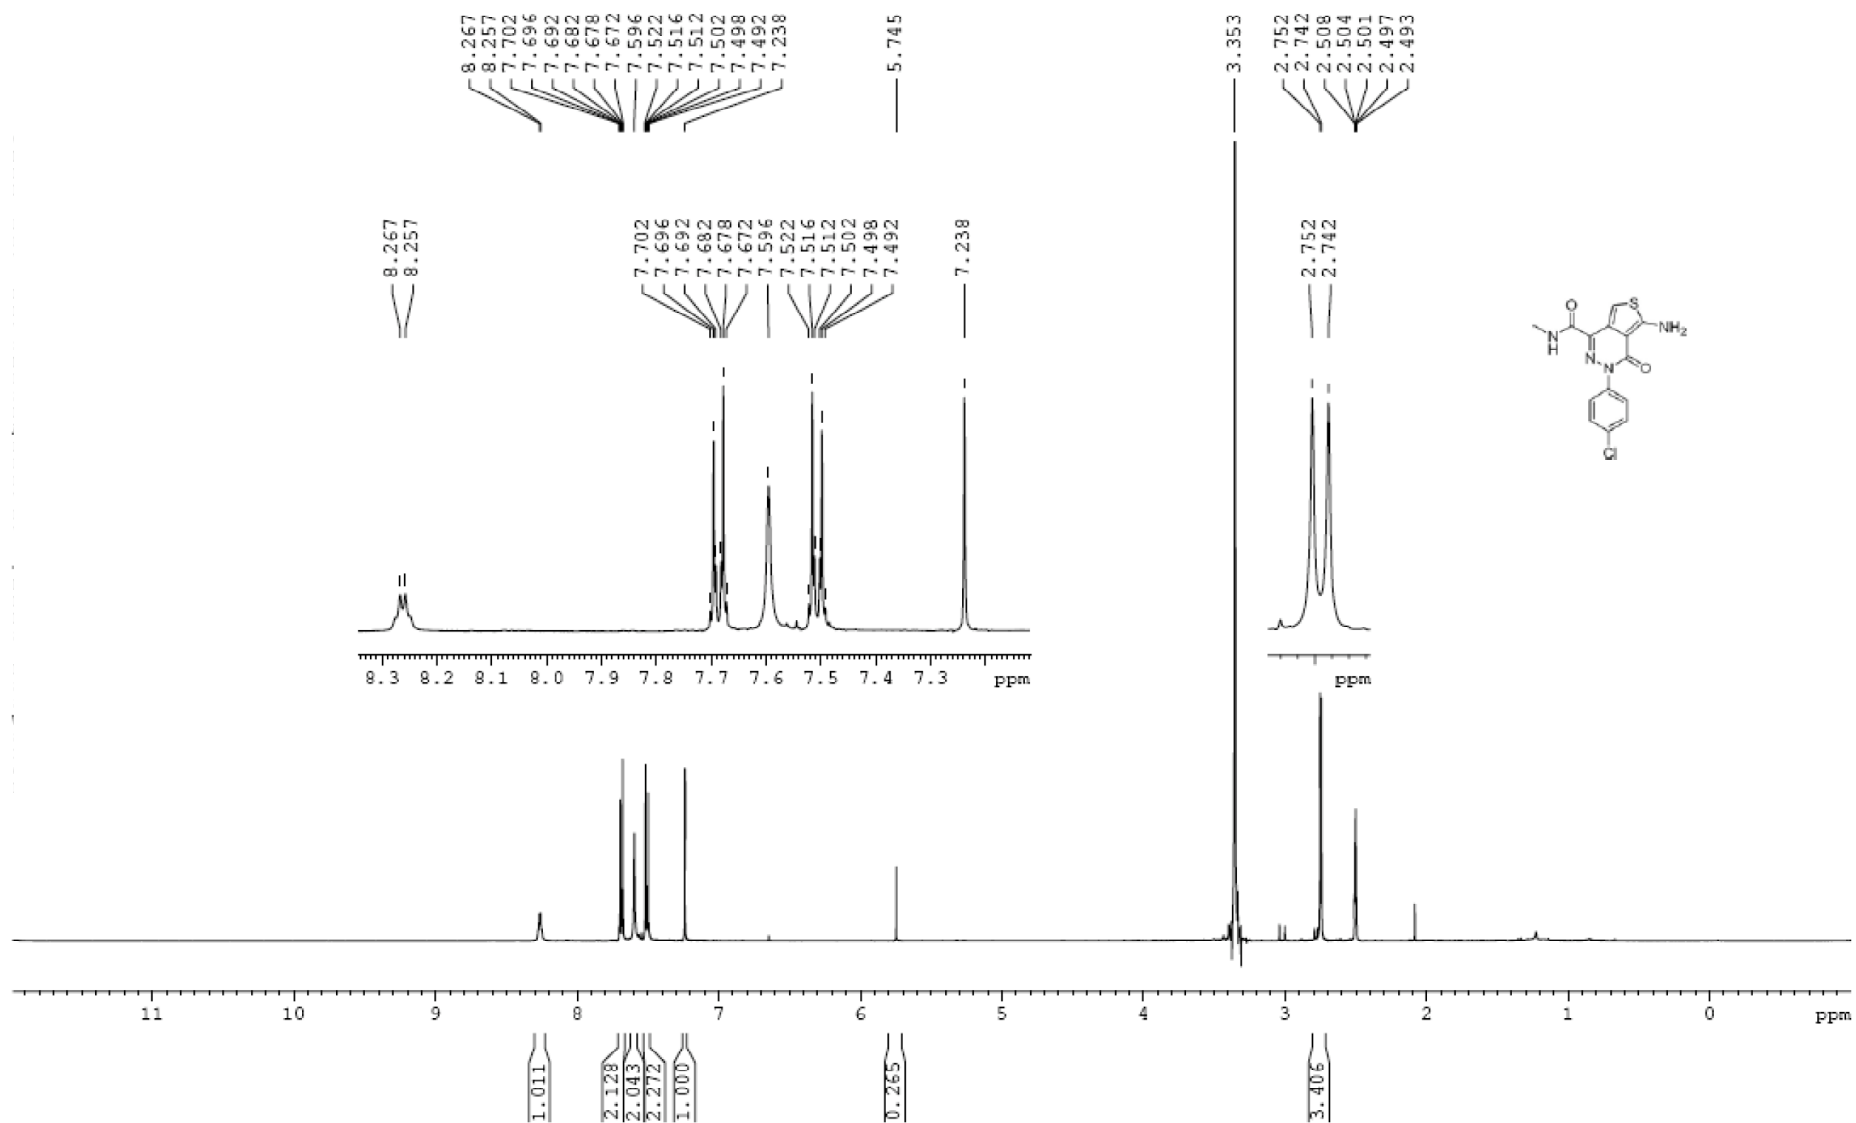



<sup>13</sup>C NMR spectrum of compound **13**

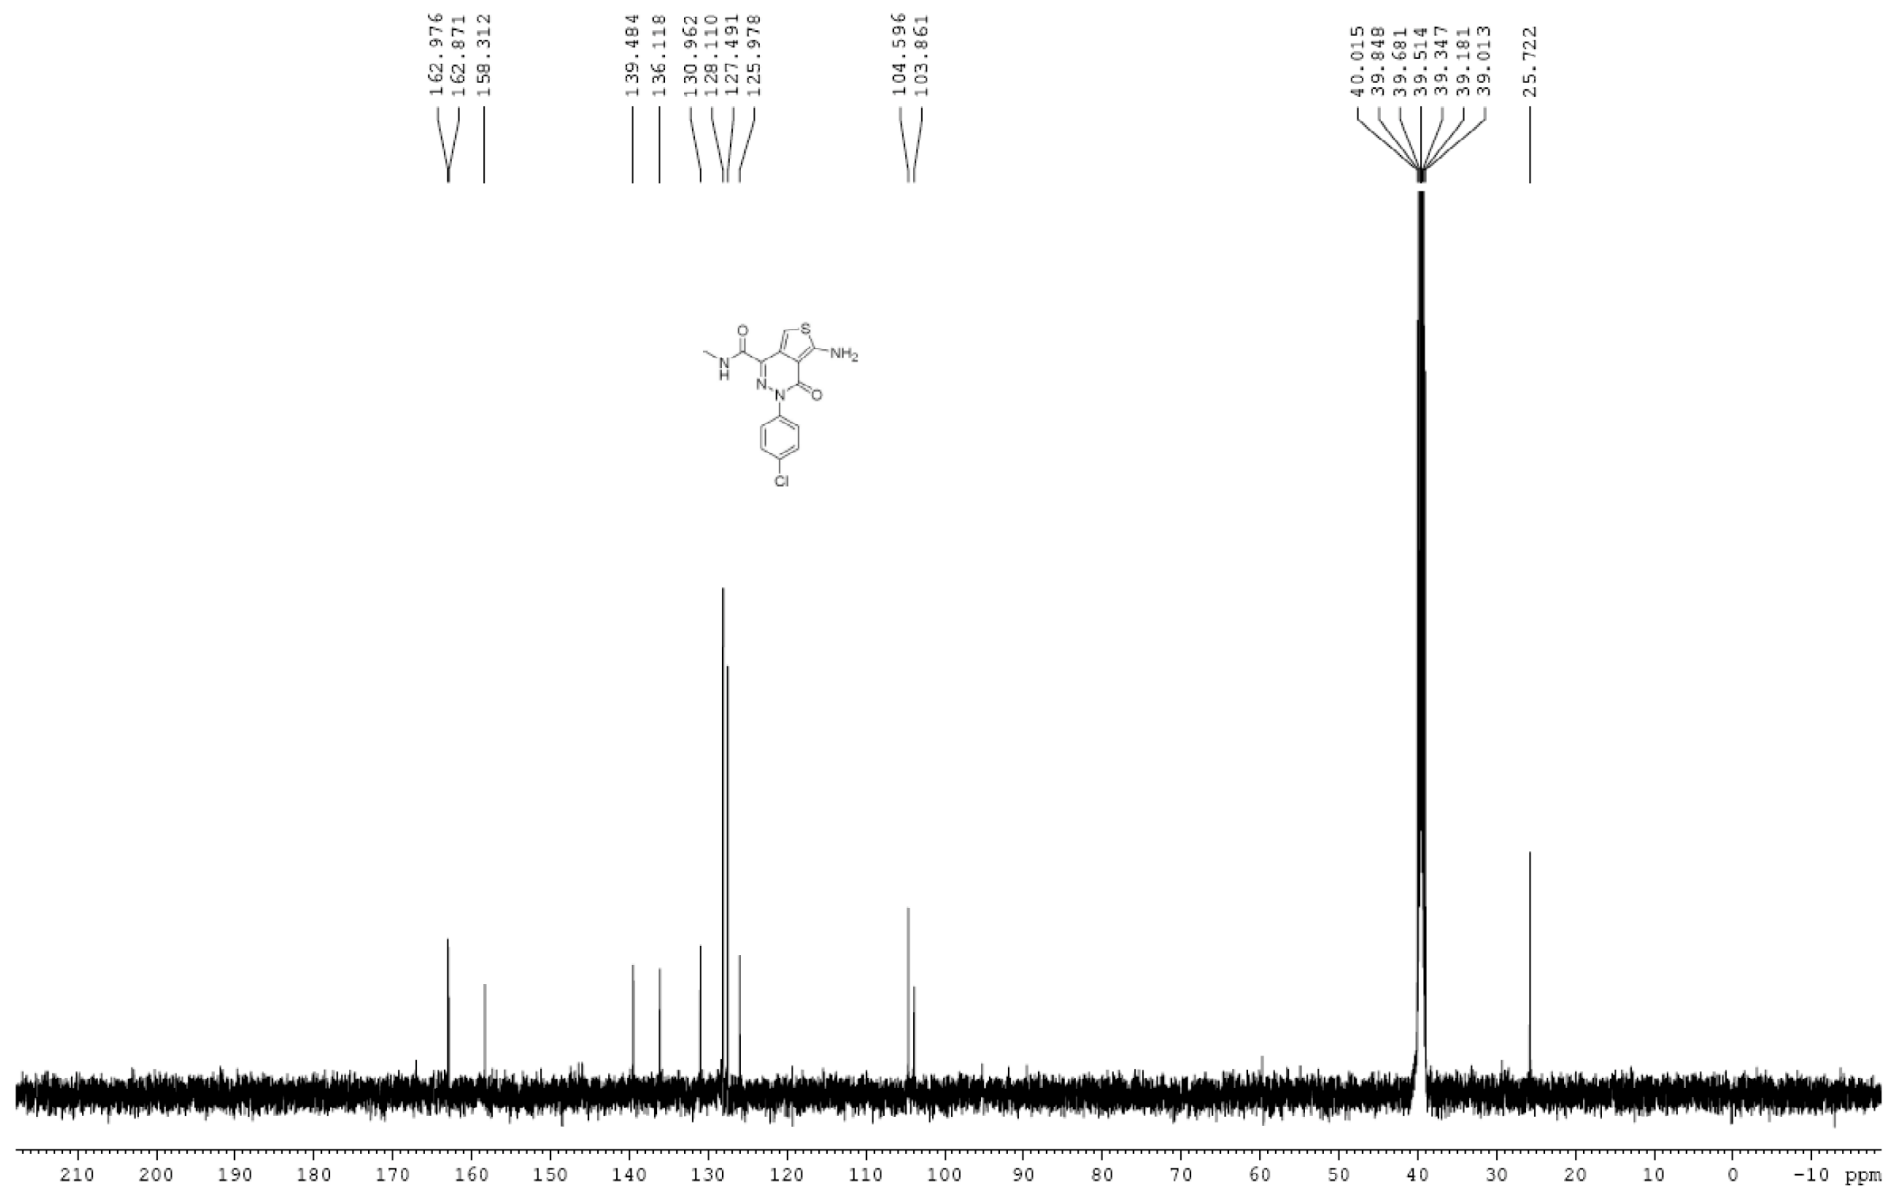

# HPLC chromatogram and mass spectrum of compound **14**

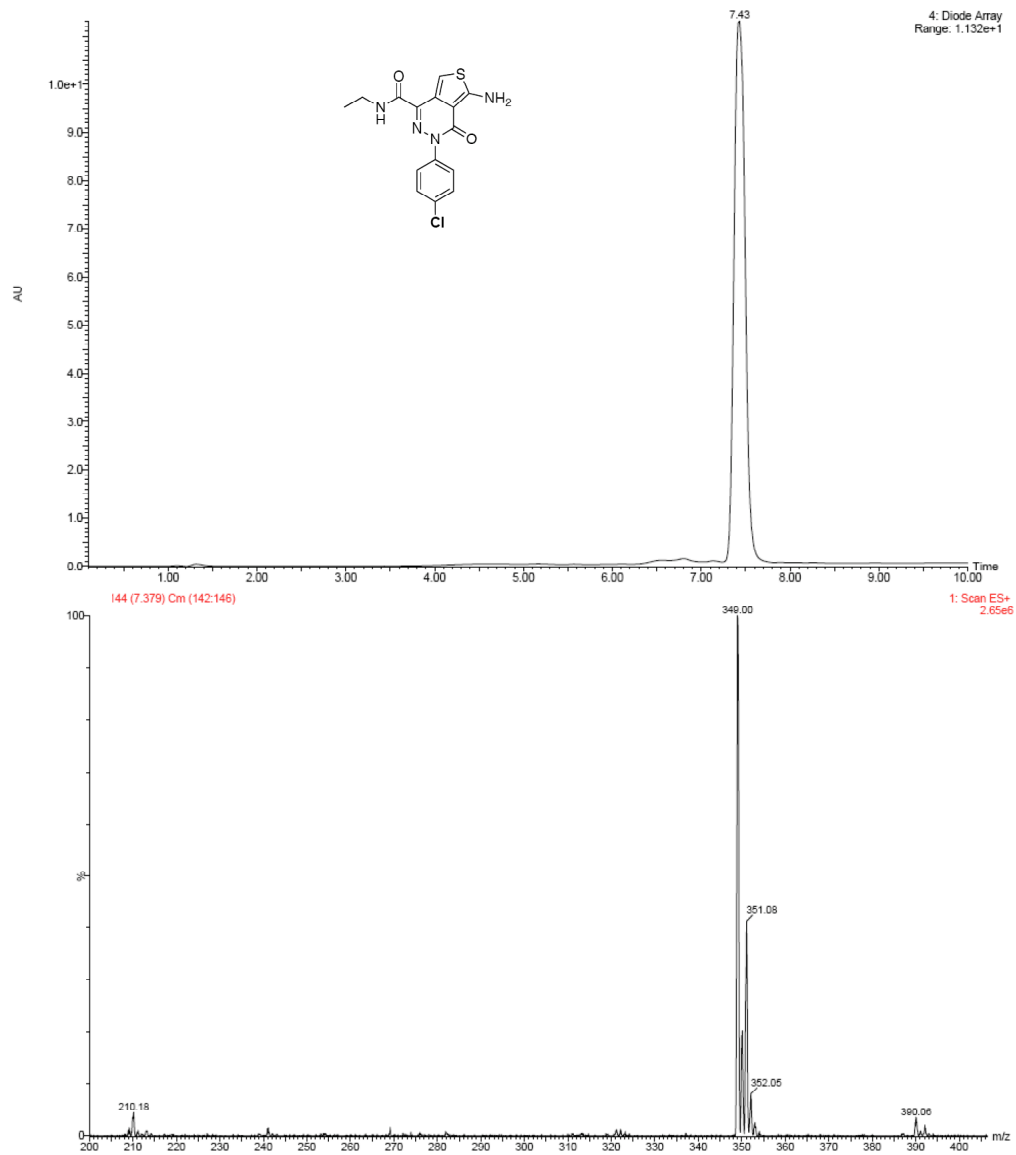

IR spectrum of compound **14**

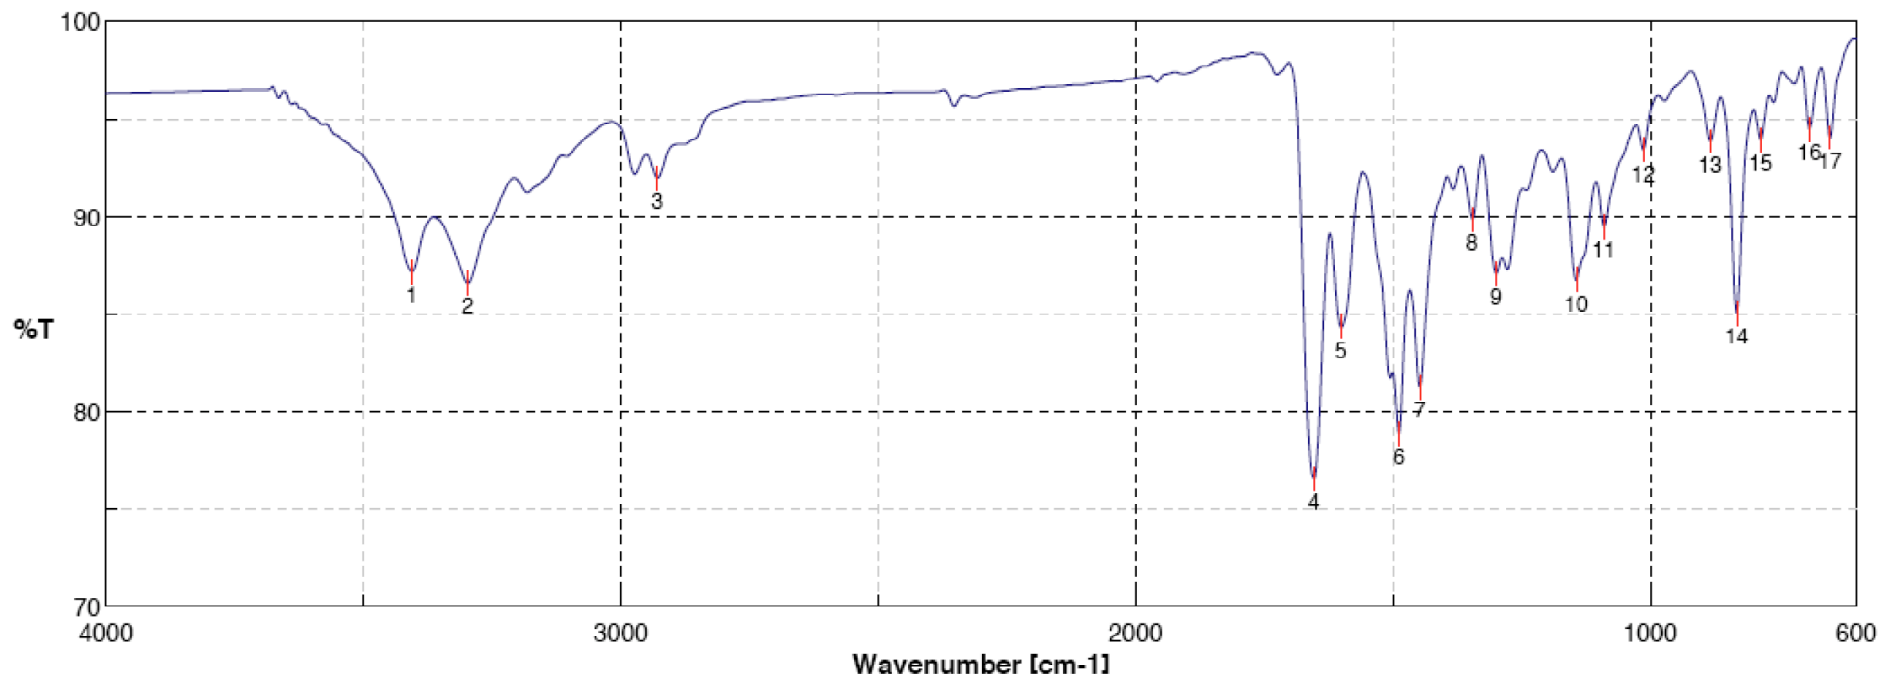

| No. | cm-1    | %T      |
|-----|---------|---------|-----|---------|---------|-----|---------|---------|-----|---------|---------|
| 1   | 3405.67 | 87.164  | 2   | 3297.2  | 86.5933 | 3   | 2928.86 | 91.9859 | 4   | 1652.7  | 76.5536 |
| 6   | 1488.29 | 78.8429 | 7   | 1447.8  | 81.2489 | 8   | 1345.59 | 89.8486 | 9   | 1299.3  | 87.0485 |
| 11  | 1090.07 | 89.4415 | 12  | 1013.41 | 93.4043 | 13  | 883.72  | 93.8533 | 14  | 832.133 | 85.056  |
| 16  | 690.873 | 94.4672 | 17  | 650.858 | 94.0304 |     |         |         | 15  | 785.85  | 93.9398 |

<sup>1</sup>H NMR spectrum of compound **14**

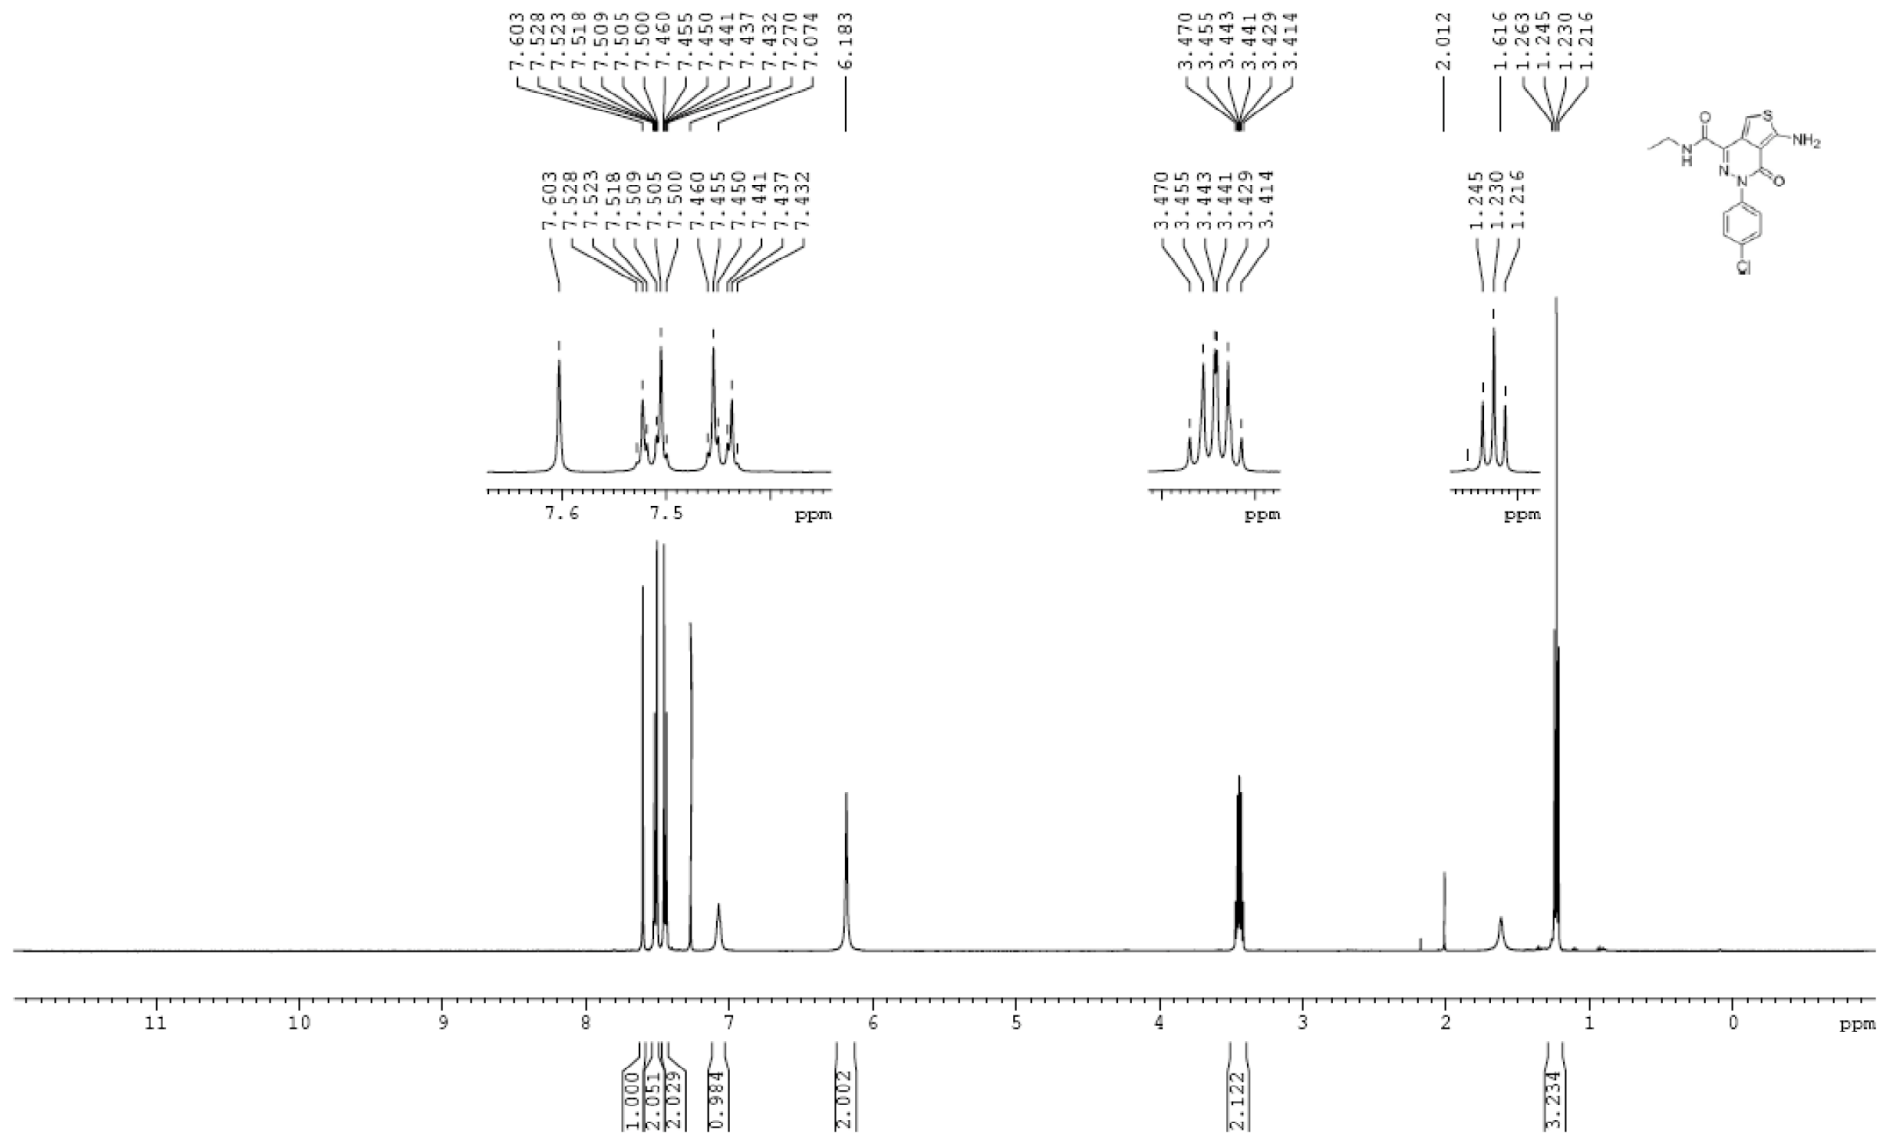

<sup>13</sup>C NMR spectrum of compound **14**

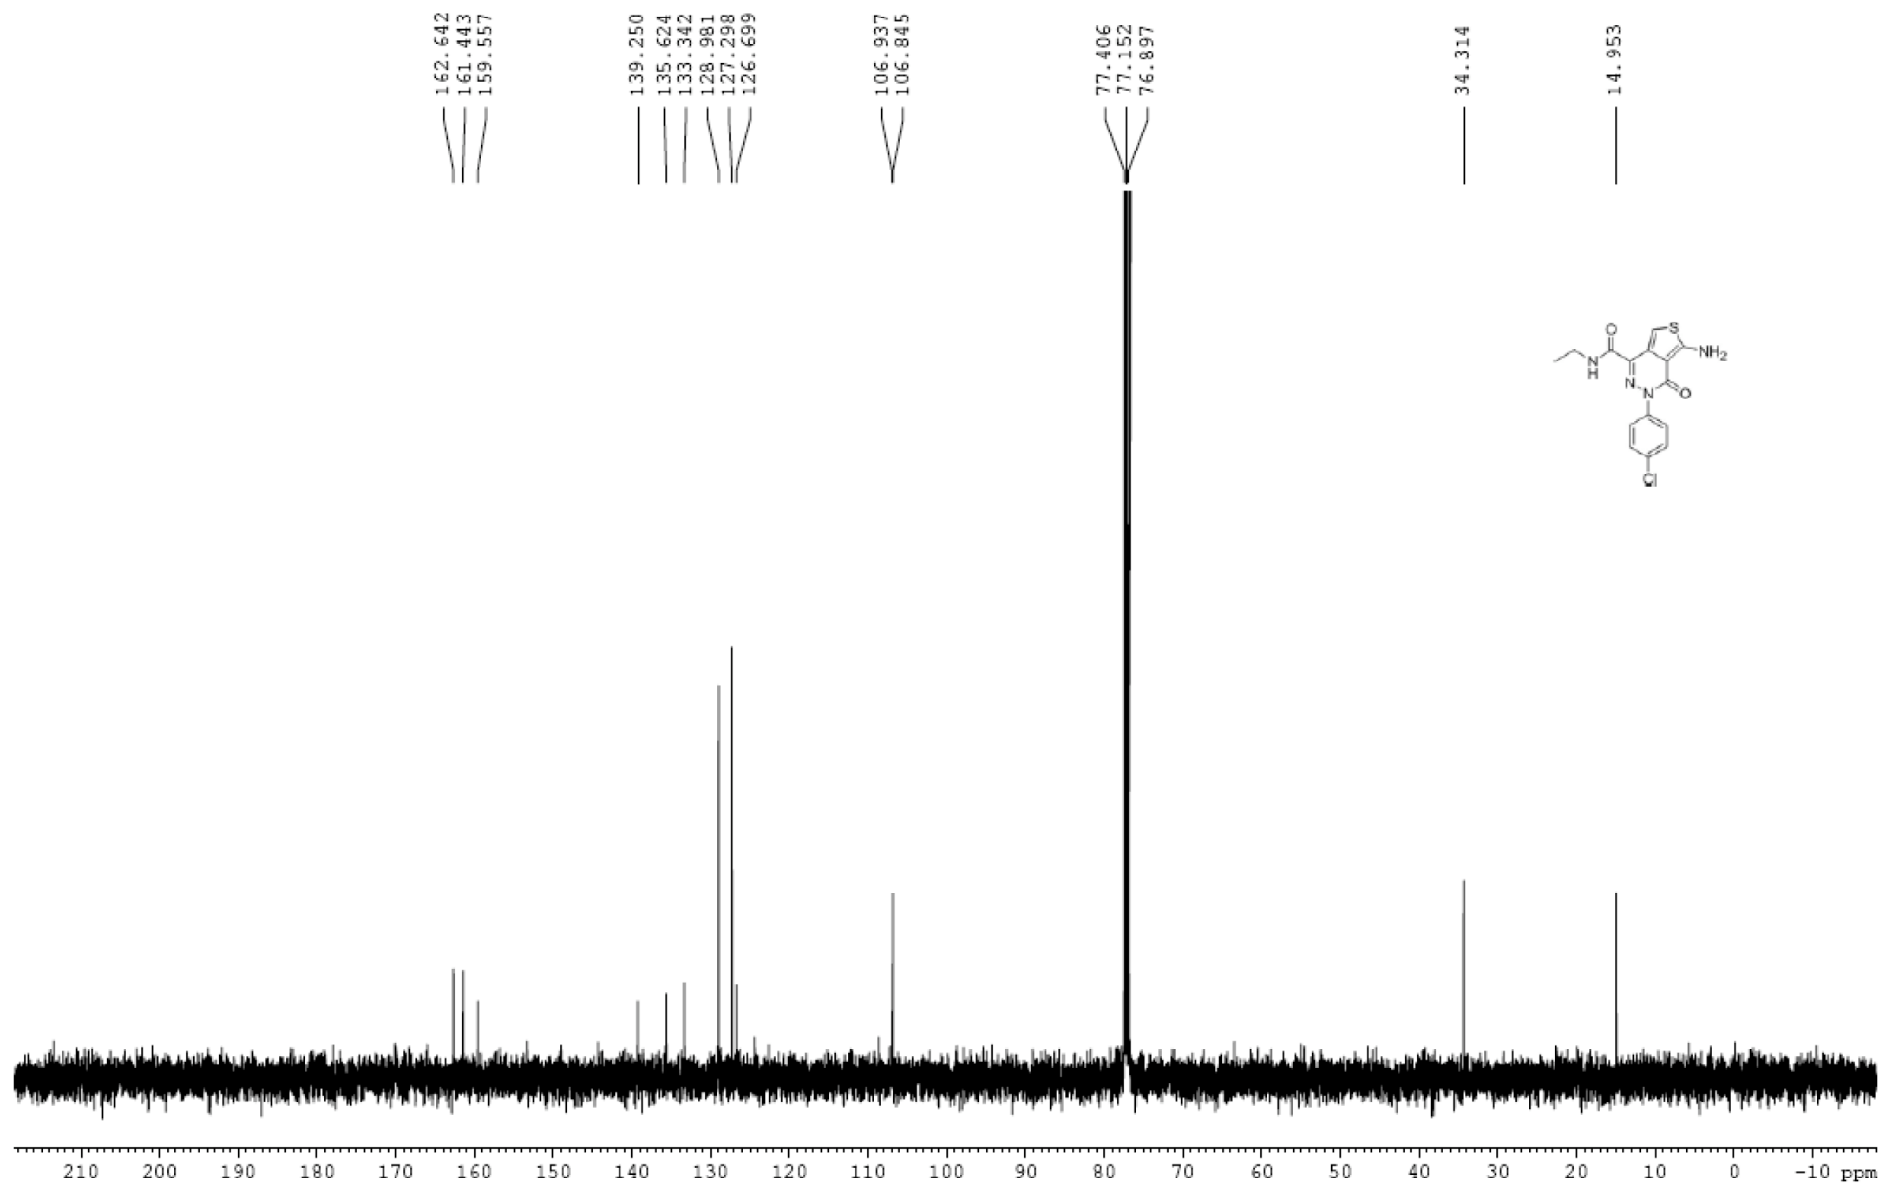

HPLC chromatogram and mass spectrum of compound **15**

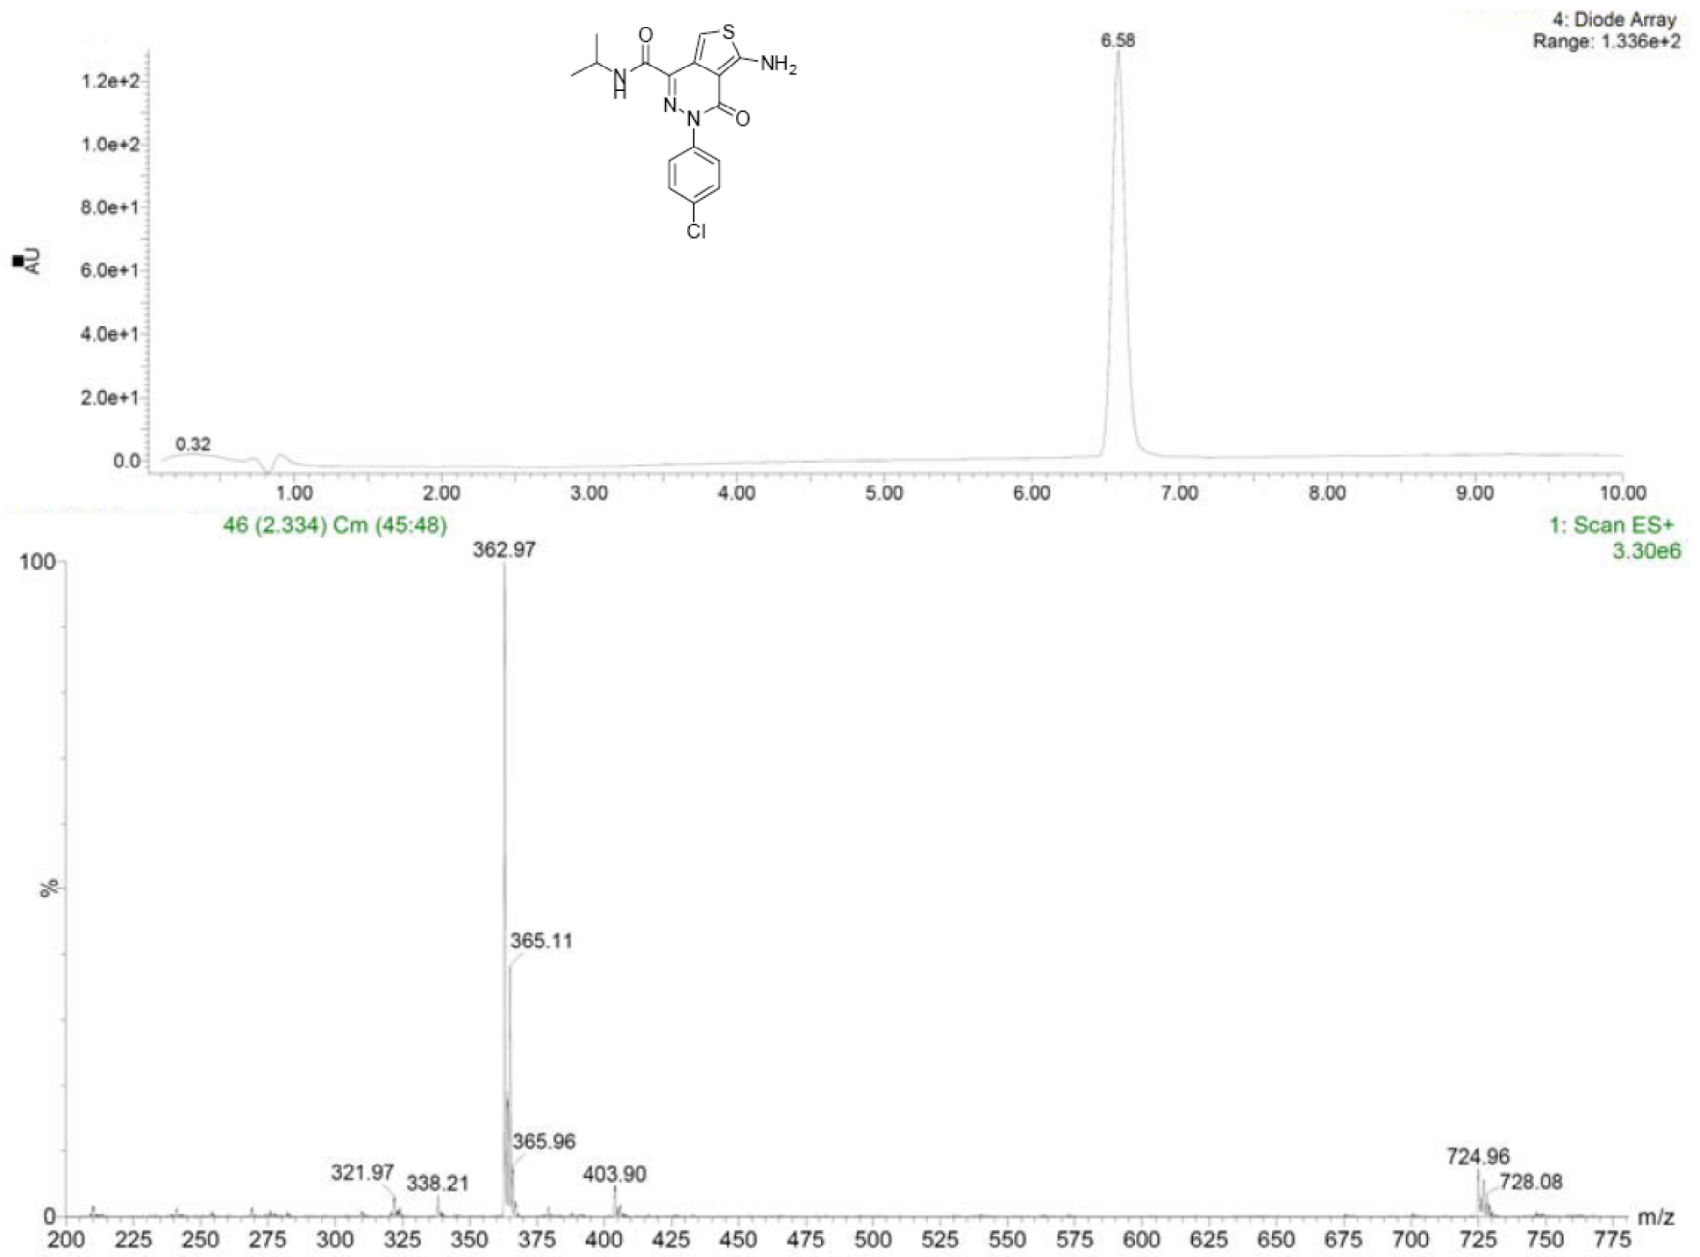

### IR spectrum of compound 15

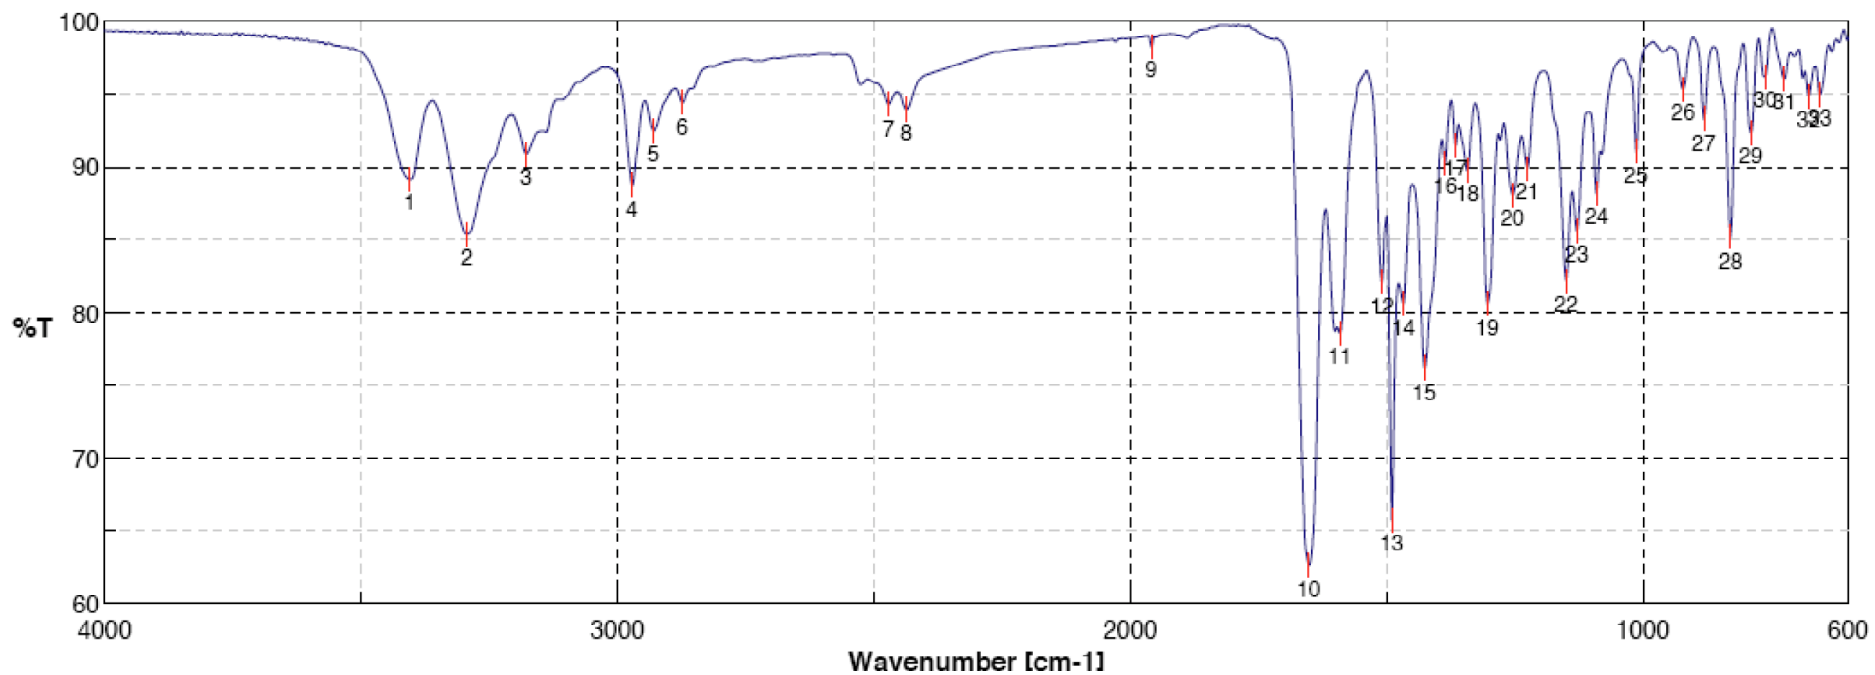

| No. | cm-1    | %T      |
|-----|---------|---------|-----|---------|---------|-----|---------|---------|-----|---------|---------|
| 1   | 3404.71 | 89.1488 | 2   | 3293.82 | 85.3532 | 3   | 3178.11 | 90.9204 | 4   | 2971.77 | 88.7515 |
| 6   | 2873.42 | 94.4016 | 7   | 2471.33 | 94.282  | 8   | 2436.62 | 93.9223 | 9   | 1958.36 | 98.2441 |
| 11  | 1590.99 | 78.5597 | 12  | 1509.03 | 82.0837 | 13  | 1489.74 | 65.7431 | 14  | 1467.56 | 80.5998 |
| 16  | 1385.6  | 90.3018 | 17  | 1365.35 | 91.4904 | 18  | 1342.21 | 89.735  | 19  | 1303.64 | 80.6181 |
| 21  | 1225.54 | 89.9495 | 22  | 1150.33 | 82.1856 | 23  | 1129.12 | 85.5783 | 24  | 1090.55 | 88.1406 |
| 26  | 921.807 | 95.3312 | 27  | 881.309 | 93.2779 | 28  | 829.241 | 85.1721 | 29  | 789.707 | 92.3515 |
| 31  | 724.139 | 96.0568 | 32  | 676.892 | 94.8075 | 33  | 654.715 | 94.9432 |     |         |         |

<sup>1</sup>H NMR spectrum of compound **15**

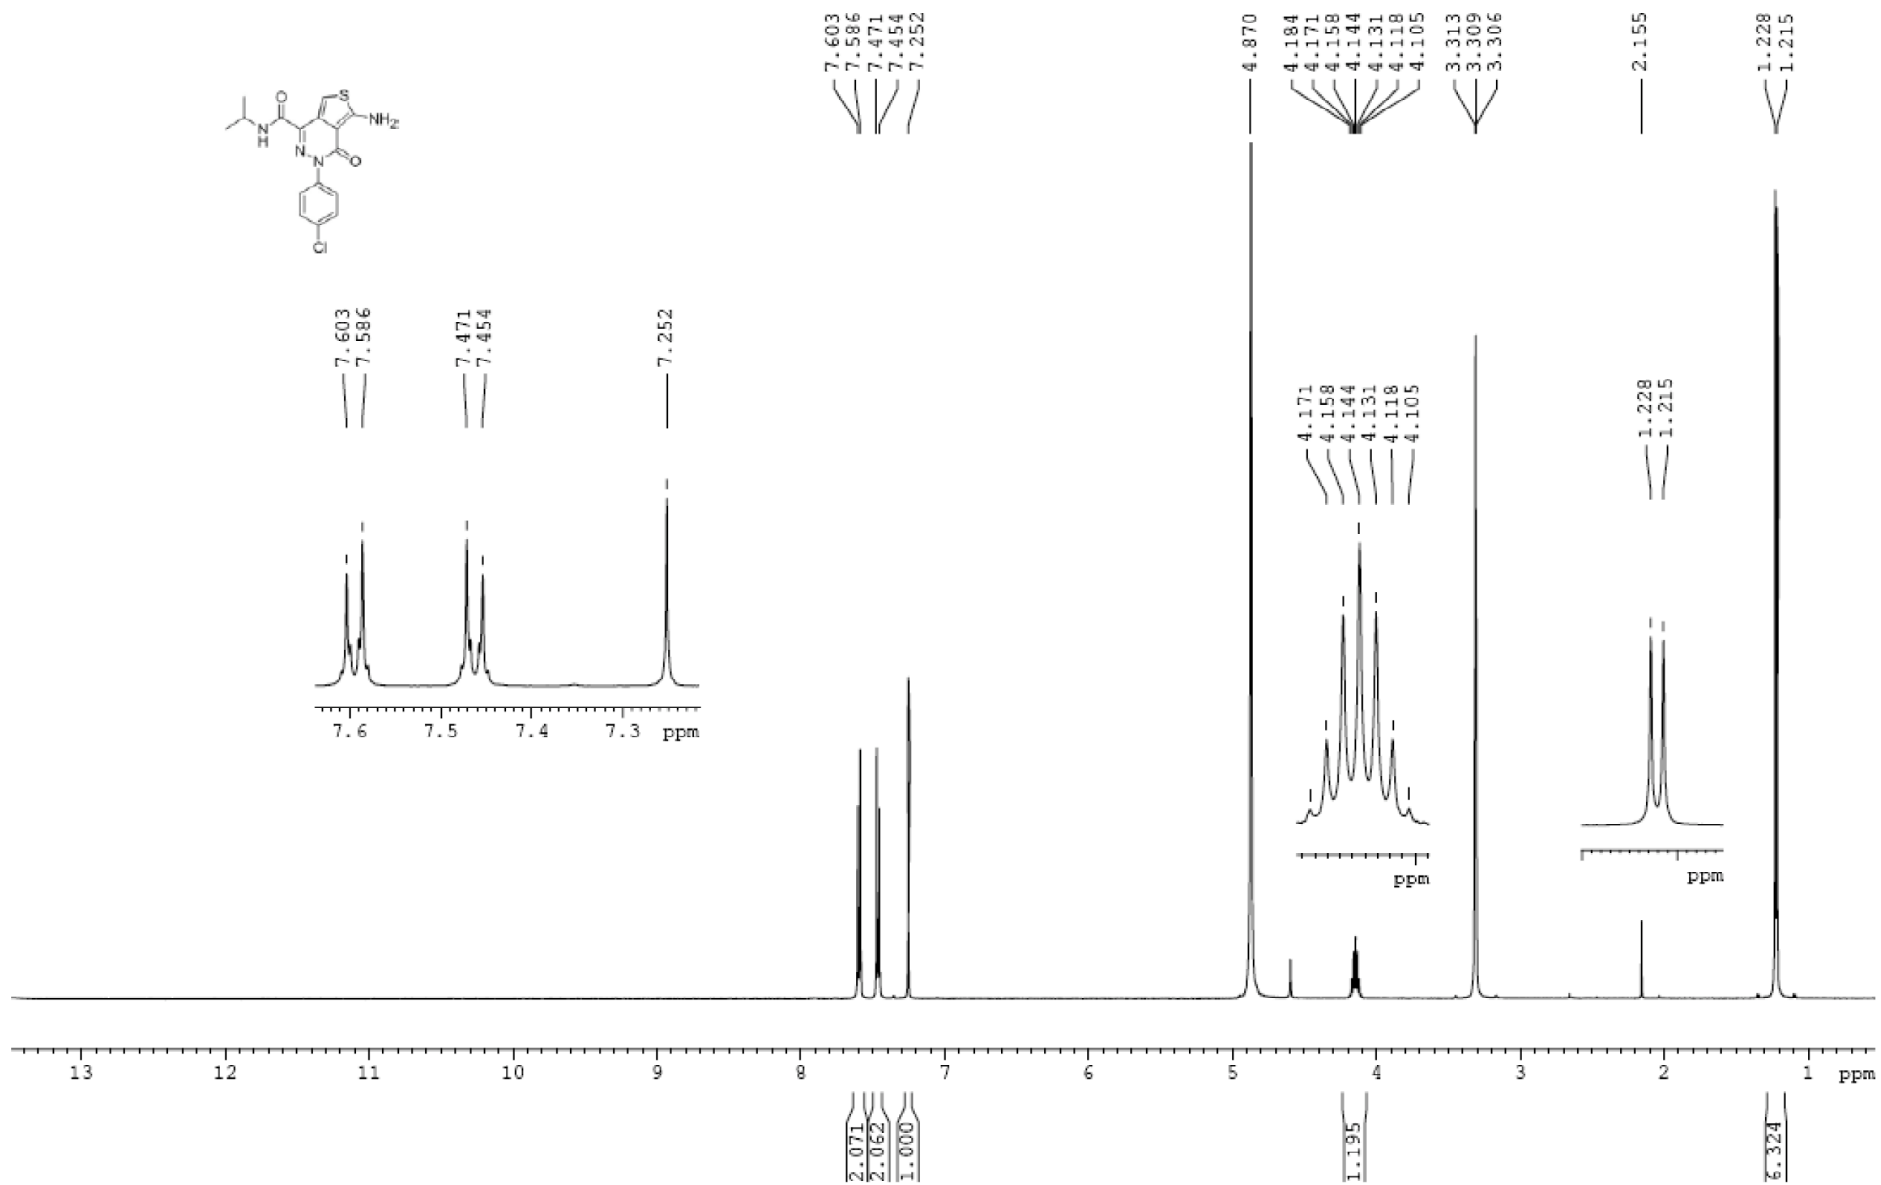



<sup>13</sup>C NMR spectrum of compound **15**

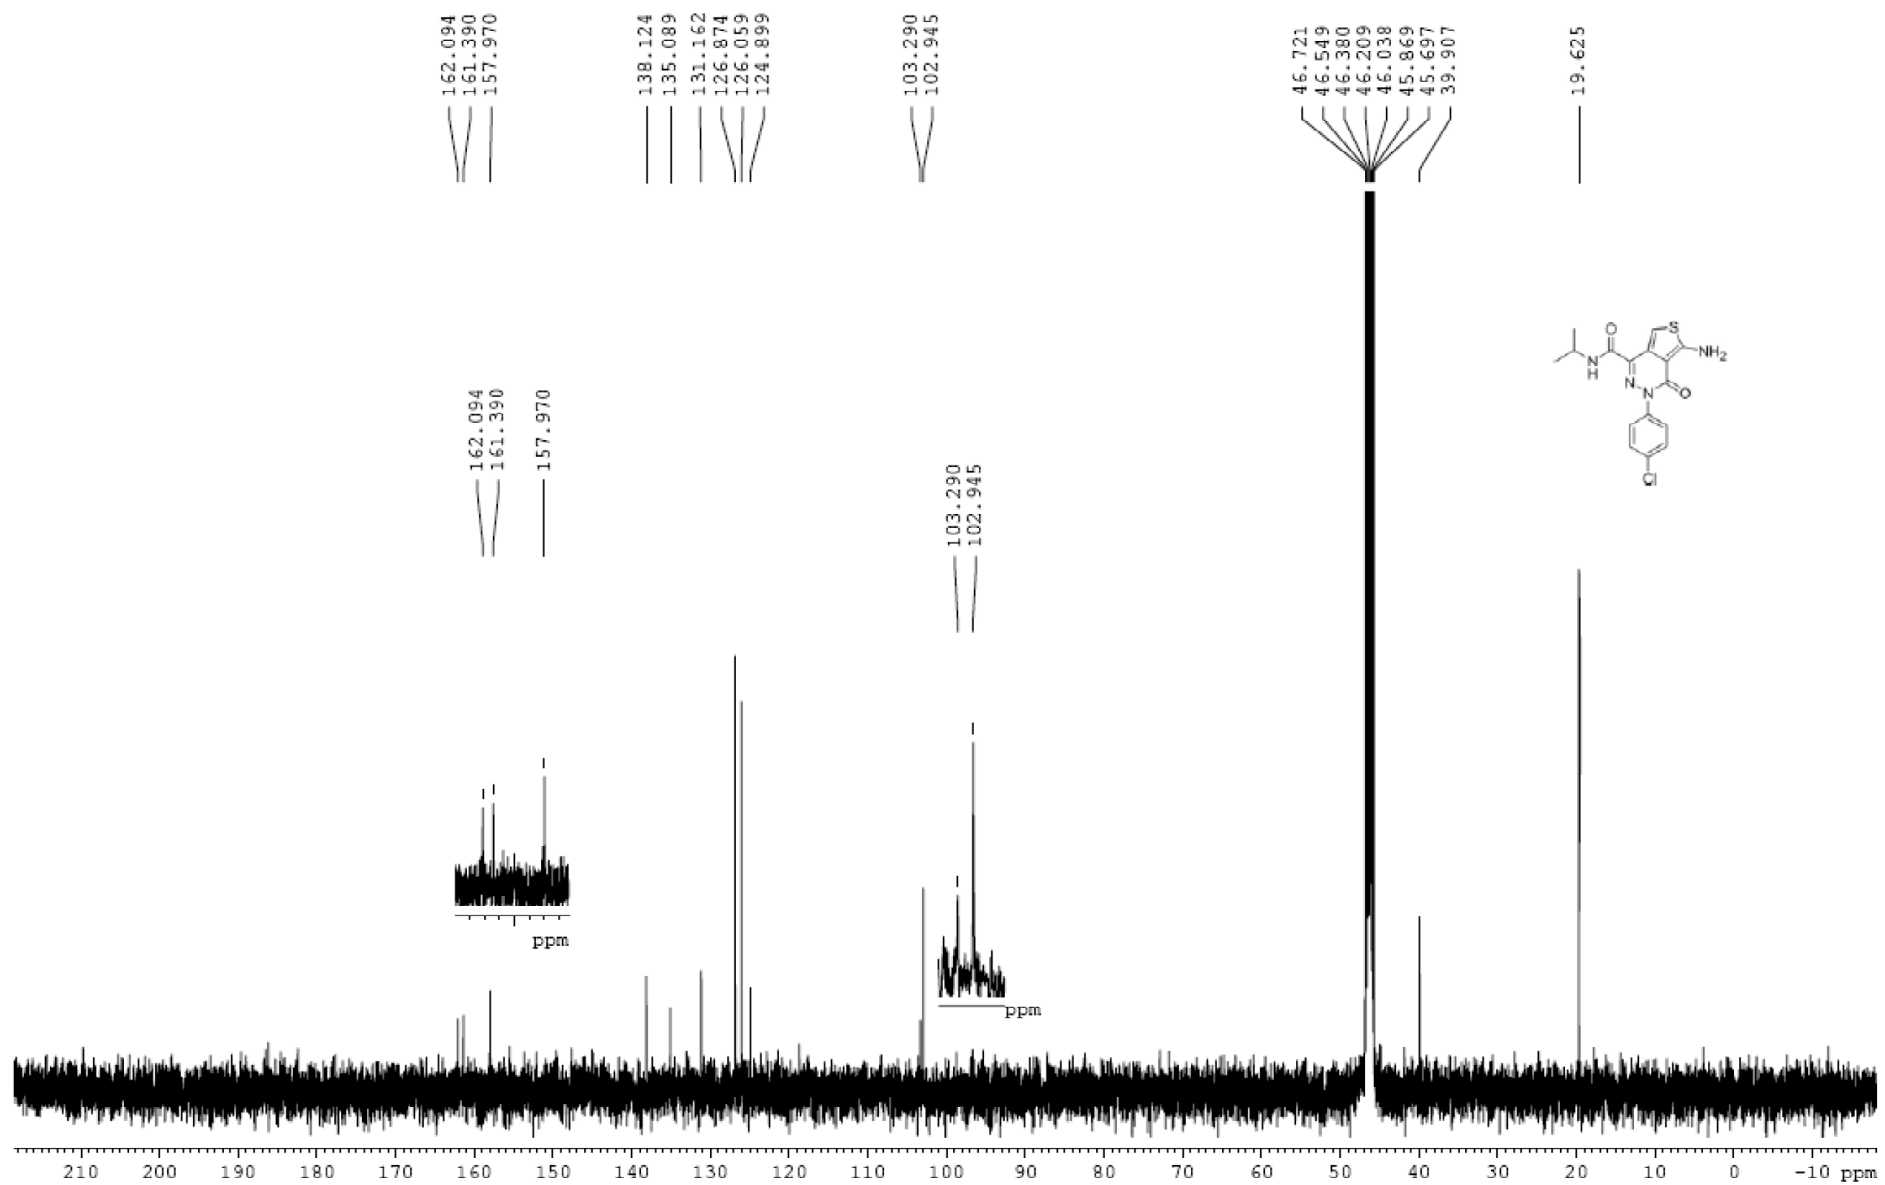

# HPLC chromatogram and mass spectrum of compound 17

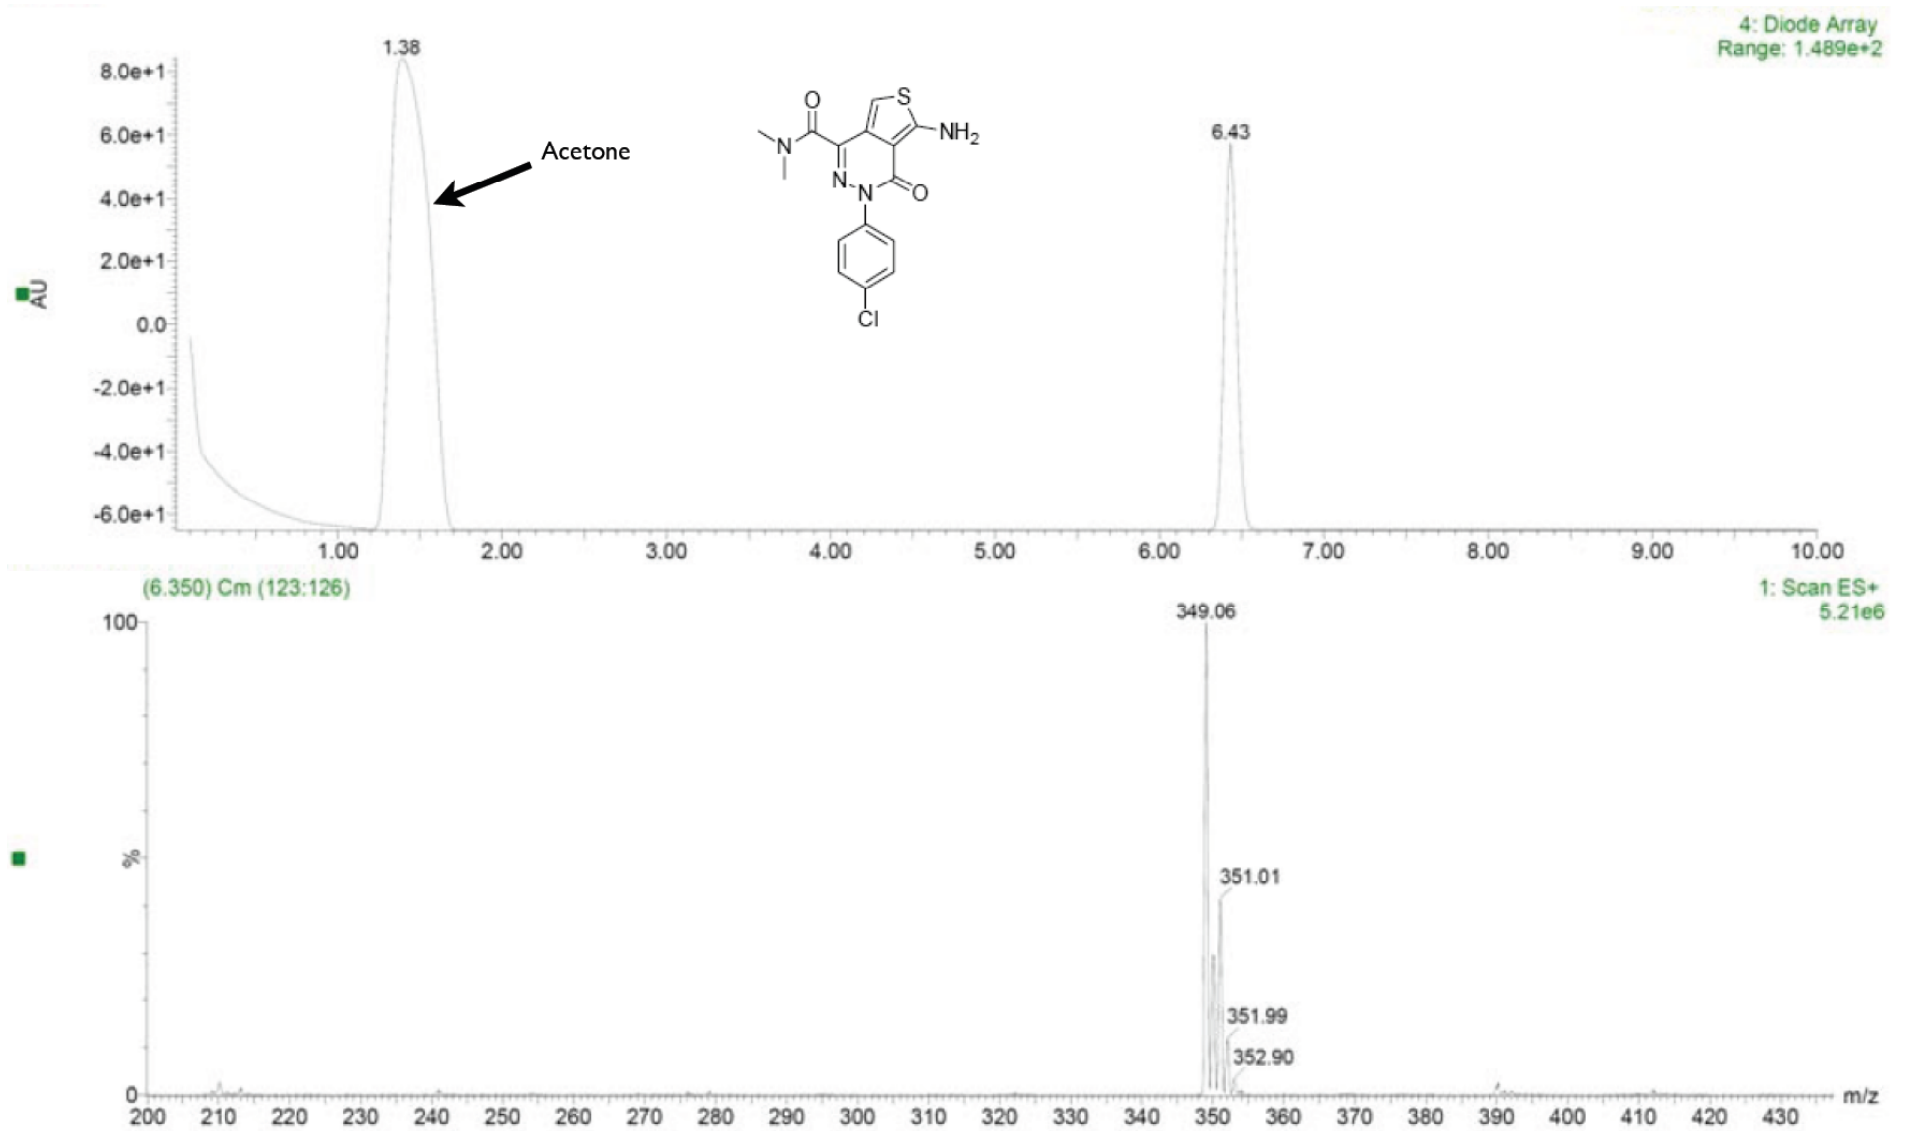

### IR spectrum of compound 17

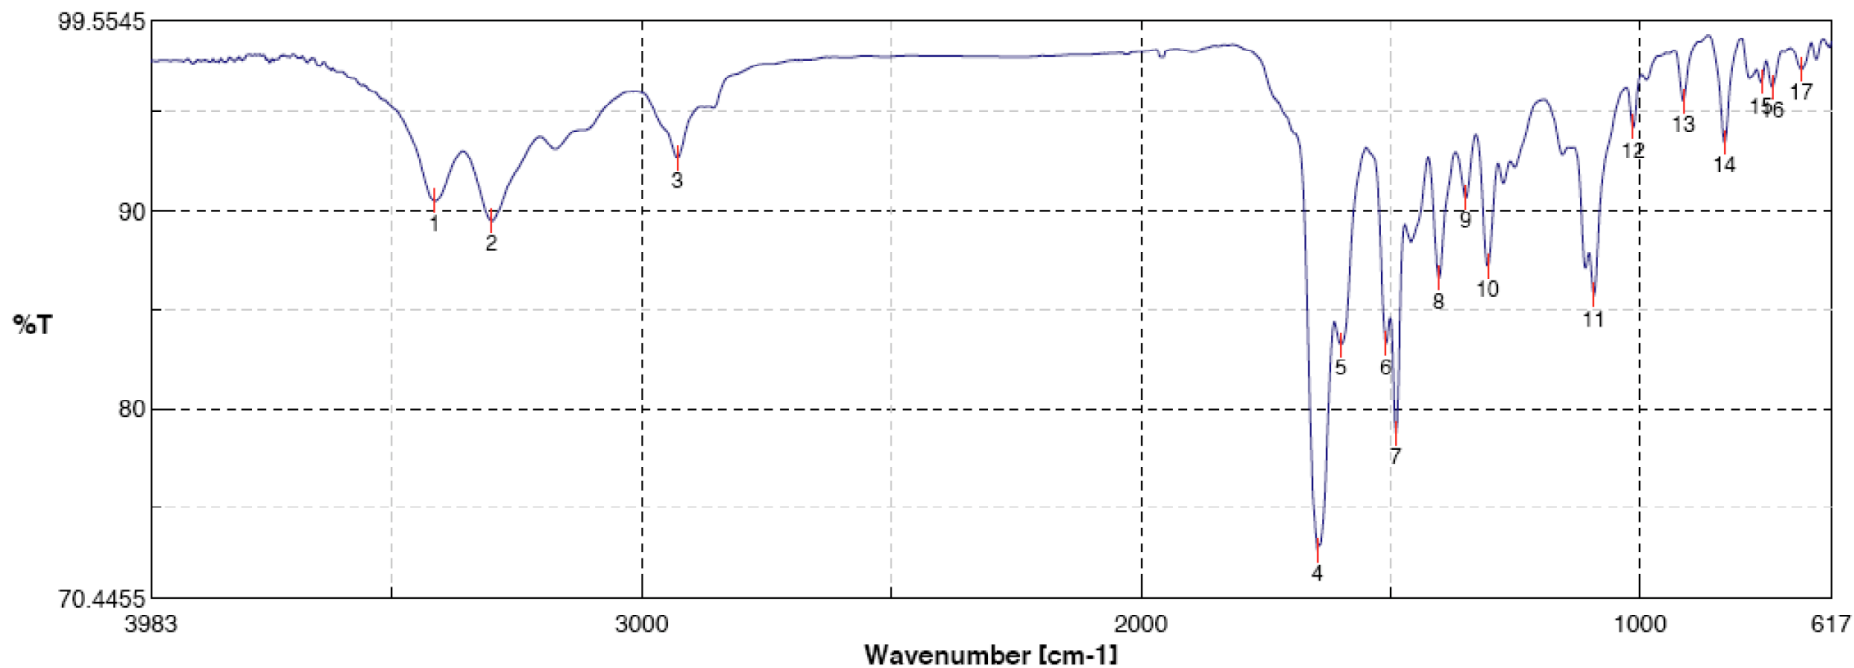

| No. | cm-1    | %T      |
|-----|---------|---------|-----|---------|---------|-----|---------|---------|-----|---------|---------|
| 1   | 3414.35 | 90.4741 | 2   | 3300.57 | 89.495  | 3   | 2928.38 | 92.6505 | 4   | 1646.43 | 72.8397 |
| 6   | 1509.51 | 83.2874 | 7   | 1489.26 | 78.7742 | 8   | 1402.96 | 86.608  | 9   | 1349.44 | 90.6484 |
| 11  | 1092.48 | 85.7207 | 12  | 1013.89 | 94.2206 | 13  | 913.611 | 95.5545 | 14  | 831.169 | 93.4493 |
| 16  | 735.71  | 96.2448 | 17  | 676.892 | 97.1305 |     |         |         | 15  | 757.405 | 96.4646 |

<sup>1</sup>H NMR spectrum of compound **17**

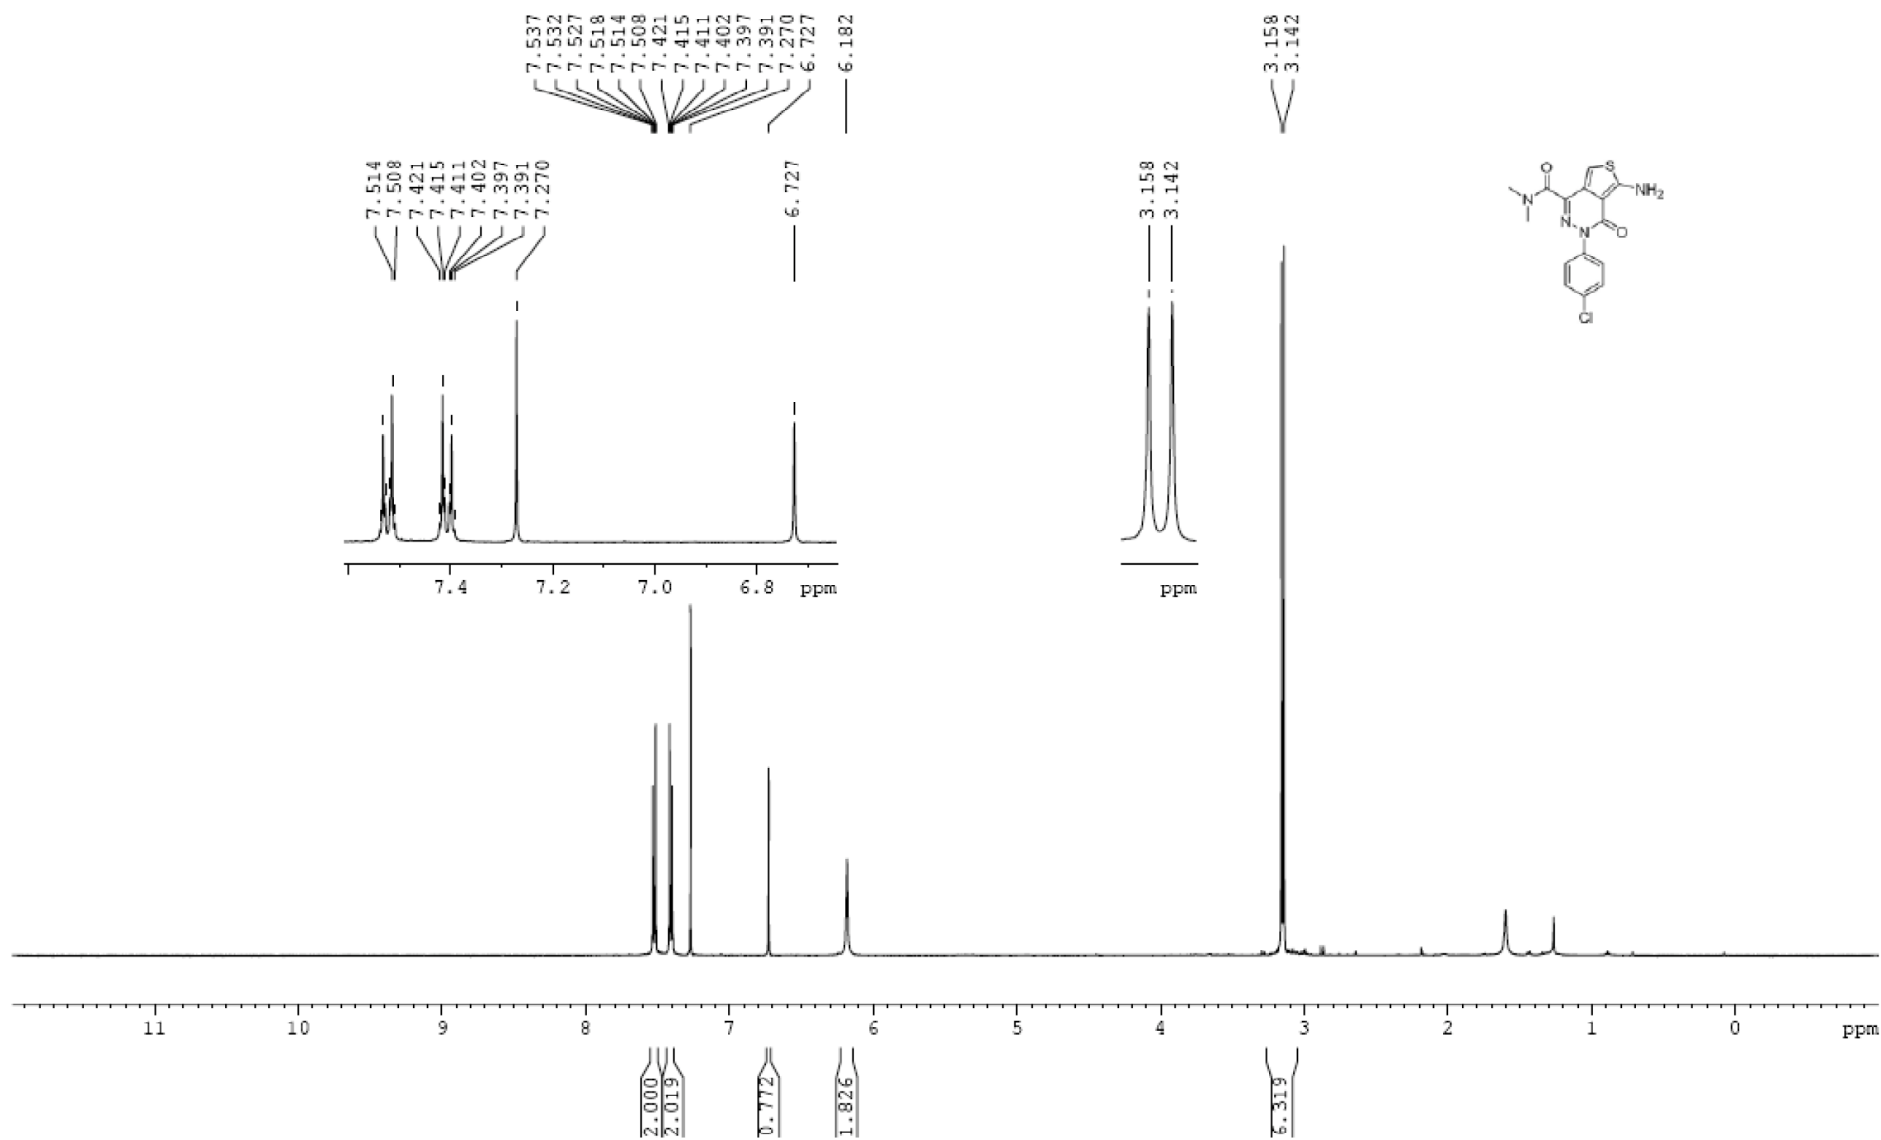

<sup>13</sup>C NMR spectrum of compound **17**

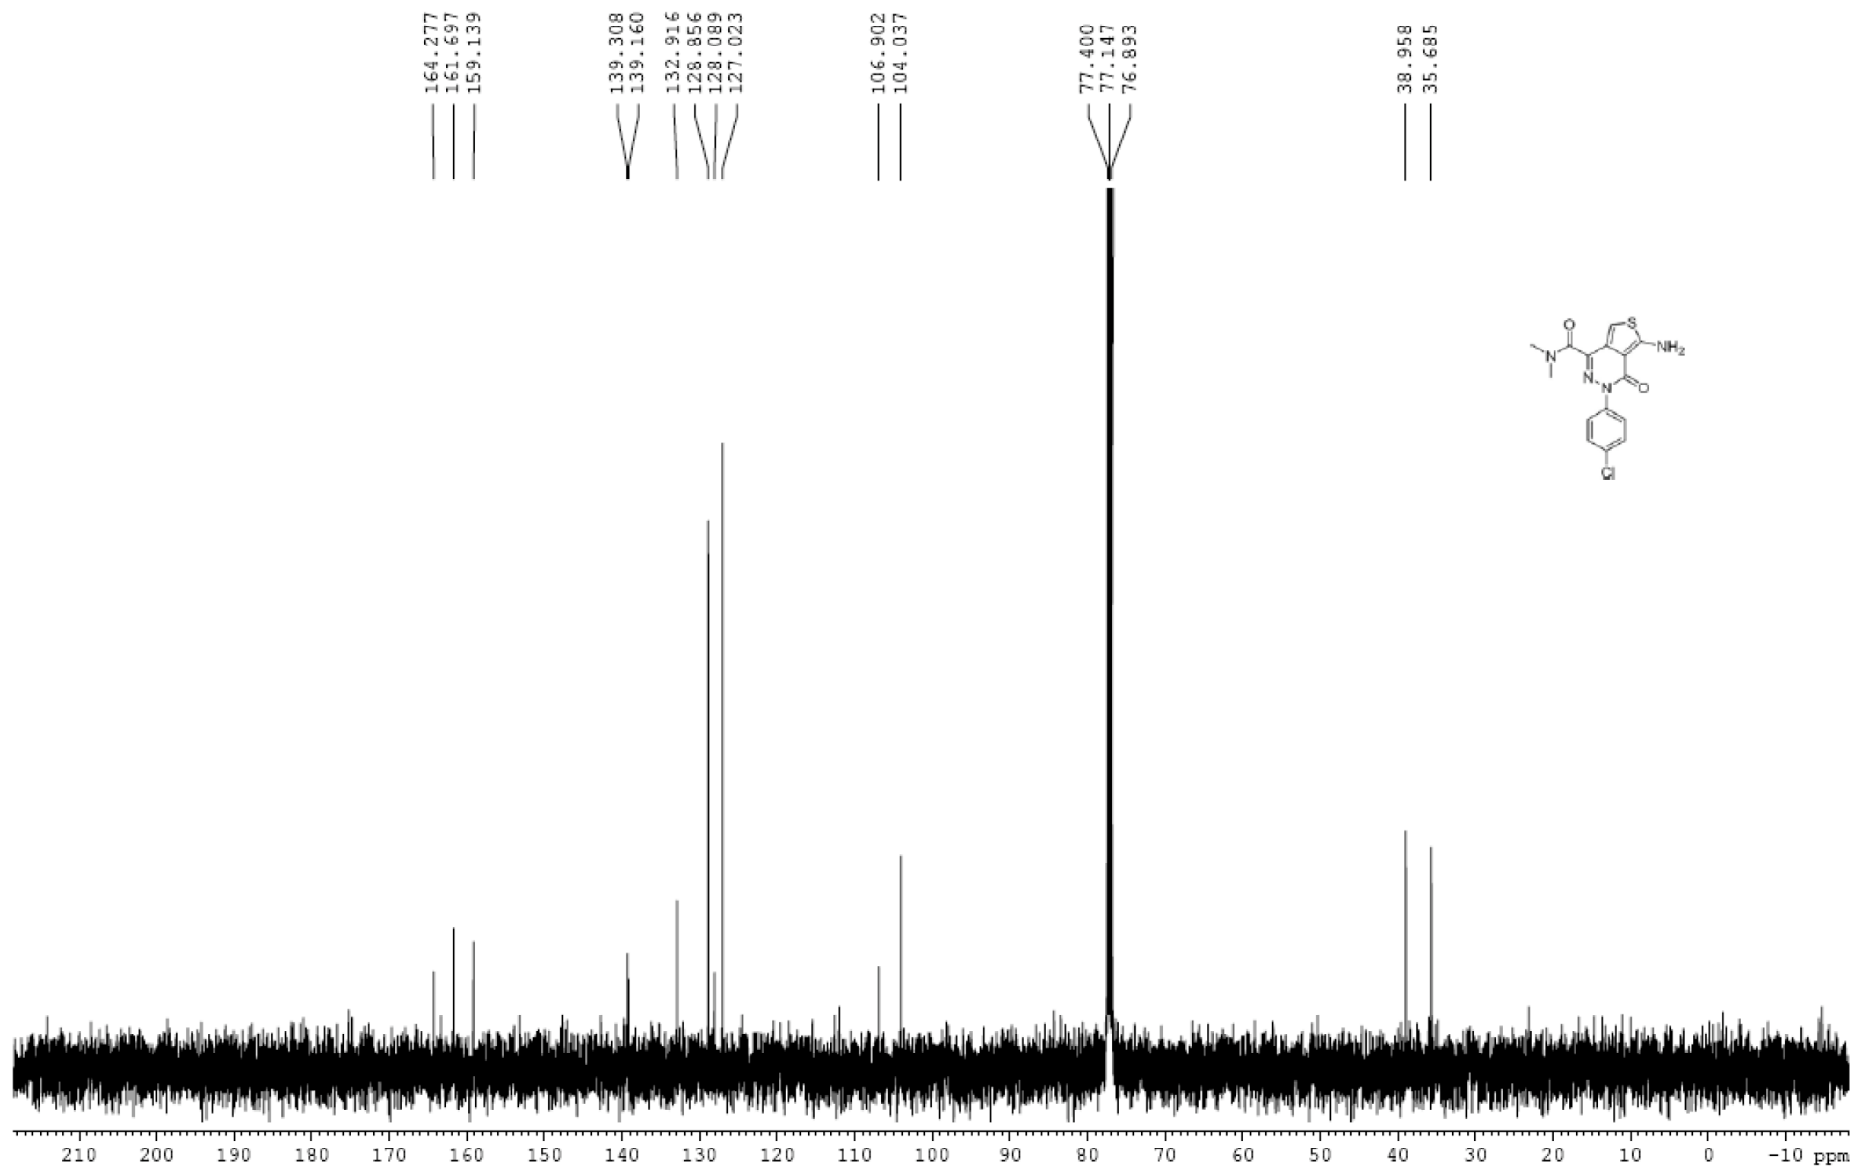

# HPLC chromatogram and mass spectrum of compound **18**

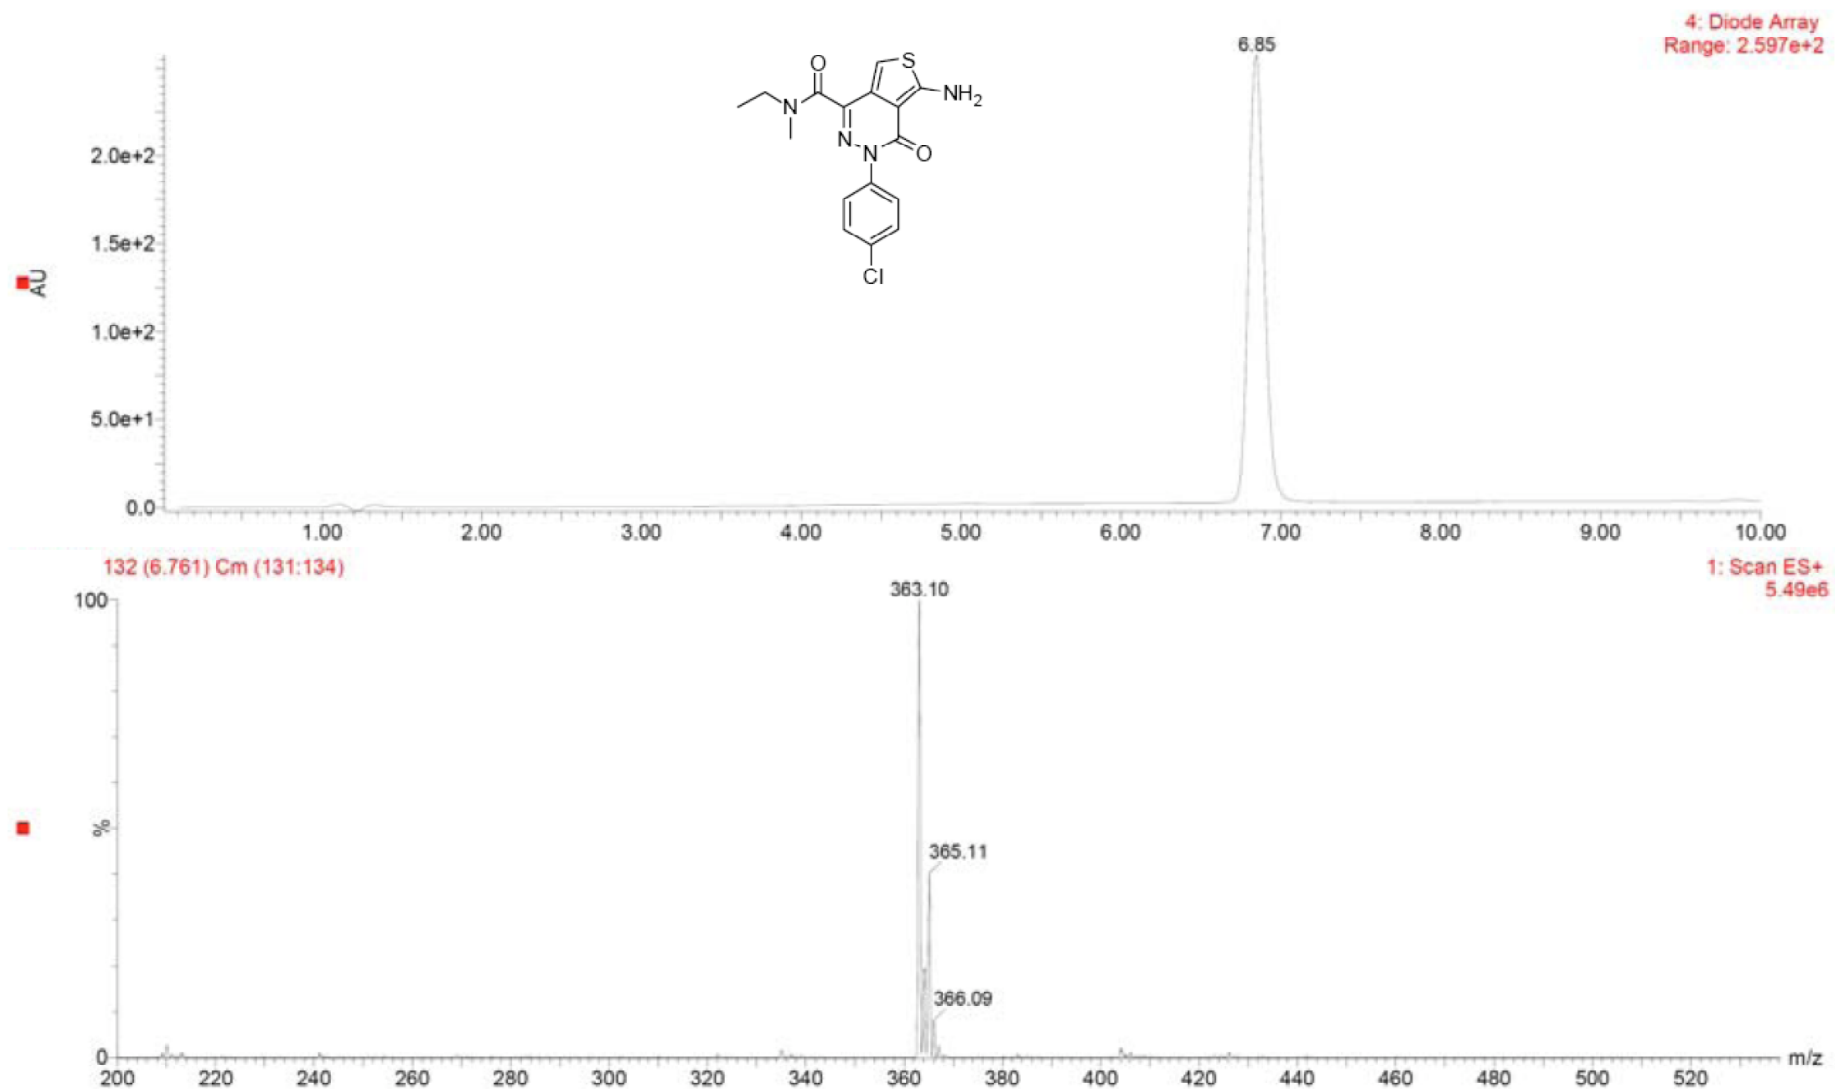

### IR spectrum of compound 18

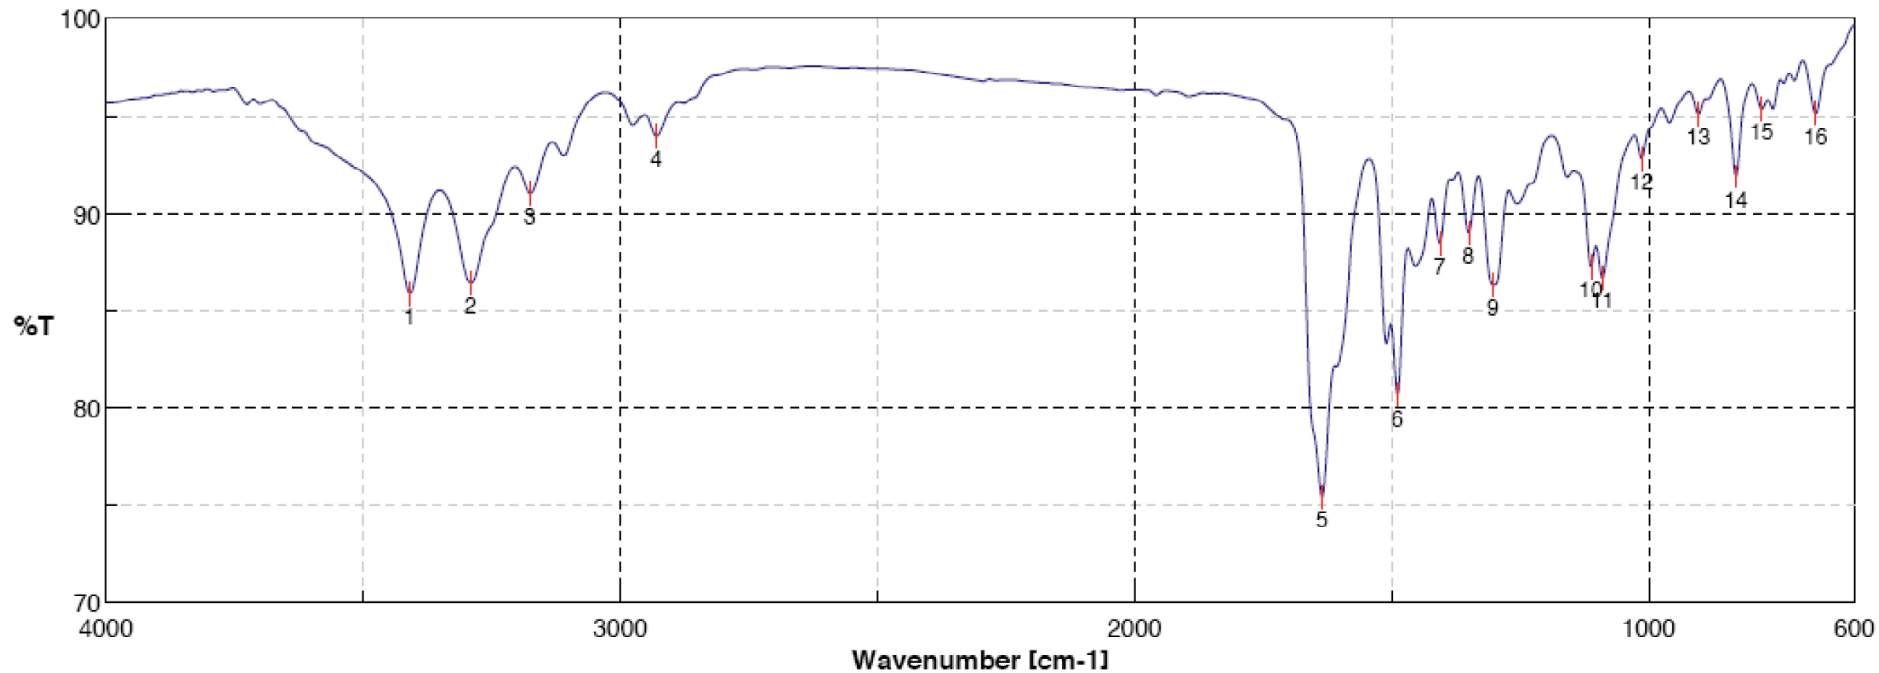

| No. | cm-1    | %T      |
|-----|---------|---------|-----|---------|---------|-----|---------|---------|-----|---------|---------|-----|---------|---------|
| 1   | 3409.05 | 85.8594 | 2   | 3290.45 | 86.4172 | 3   | 3175.22 | 91.0245 | 4   | 2929.82 | 93.966  | 5   | 1635.34 | 75.4437 |
| 6   | 1488.78 | 80.6619 | 7   | 1406.33 | 88.4414 | 8   | 1350.41 | 88.9996 | 9   | 1302.2  | 86.3198 | 10  | 1112.24 | 87.2591 |
| 11  | 1090.07 | 86.701  | 12  | 1013.89 | 92.8232 | 13  | 903.487 | 95.1366 | 14  | 830.205 | 91.9005 | 15  | 780.547 | 95.3769 |
| 16  | 675.446 | 95.1657 |     |         |         |     |         |         |     |         |         |     |         |         |

<sup>1</sup>H NMR spectrum of compound **18**

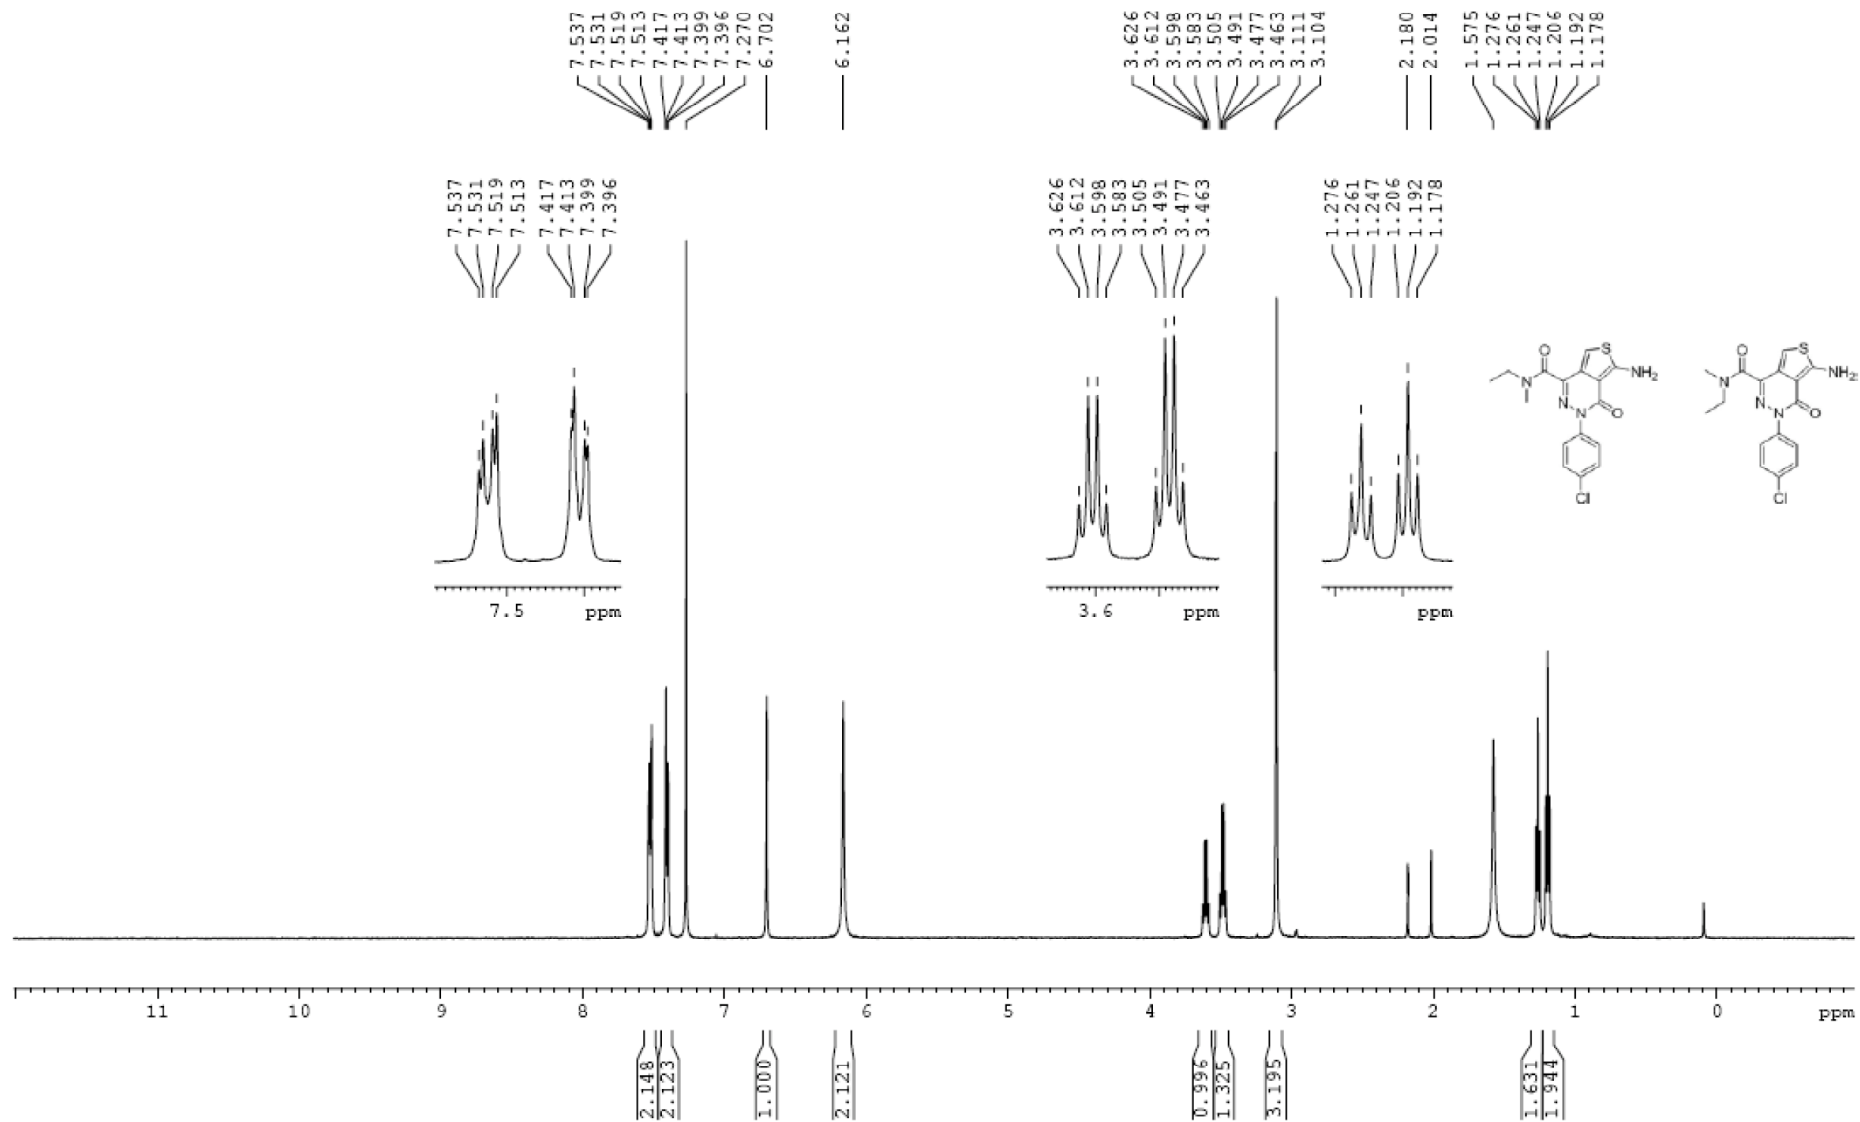



<sup>13</sup>C NMR spectrum of compound **18**

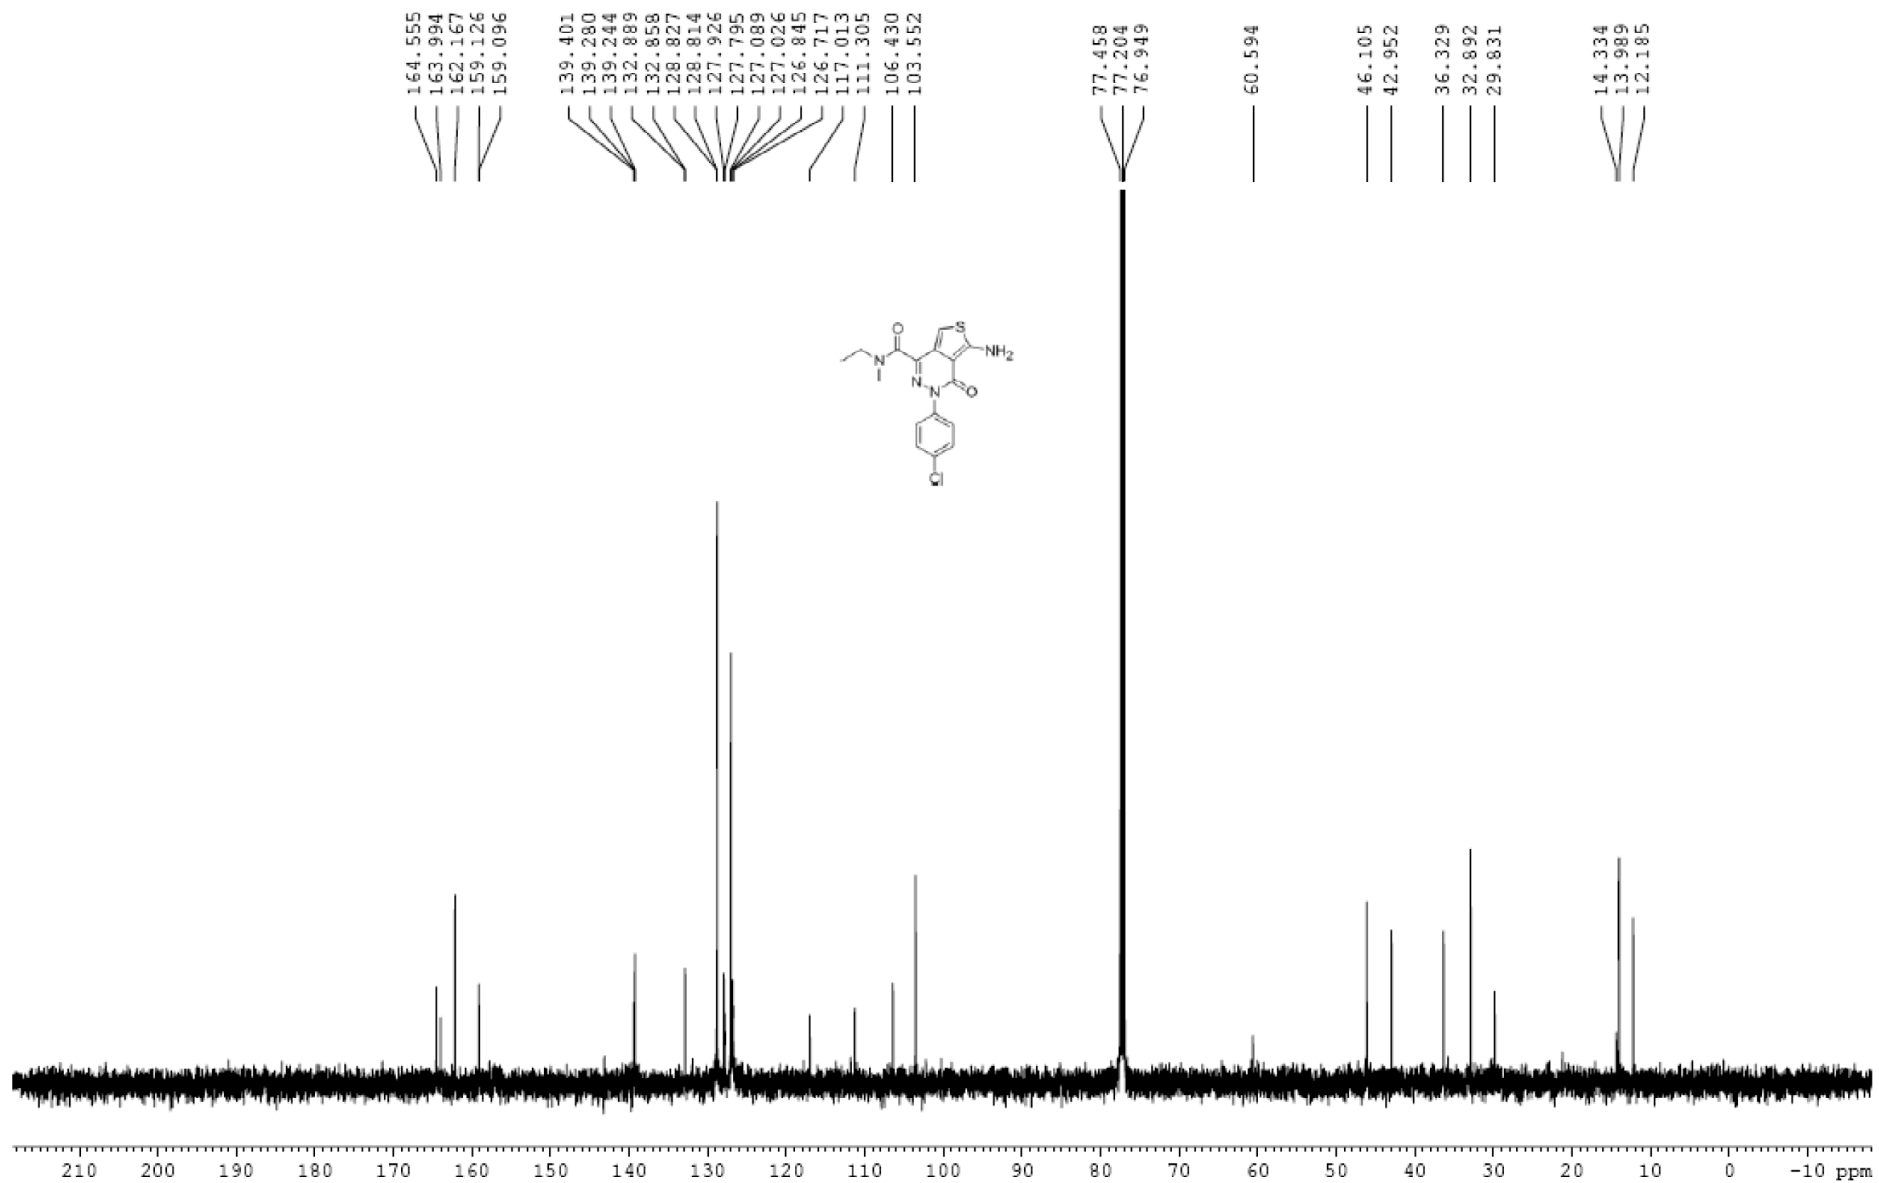

# HPLC chromatogram and mass spectrum of compound **19**

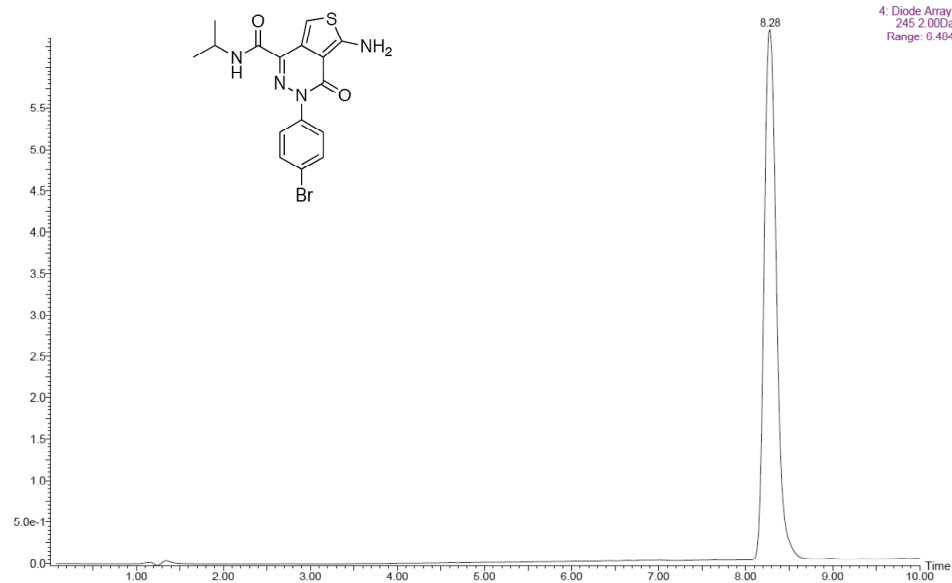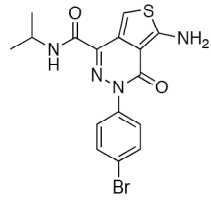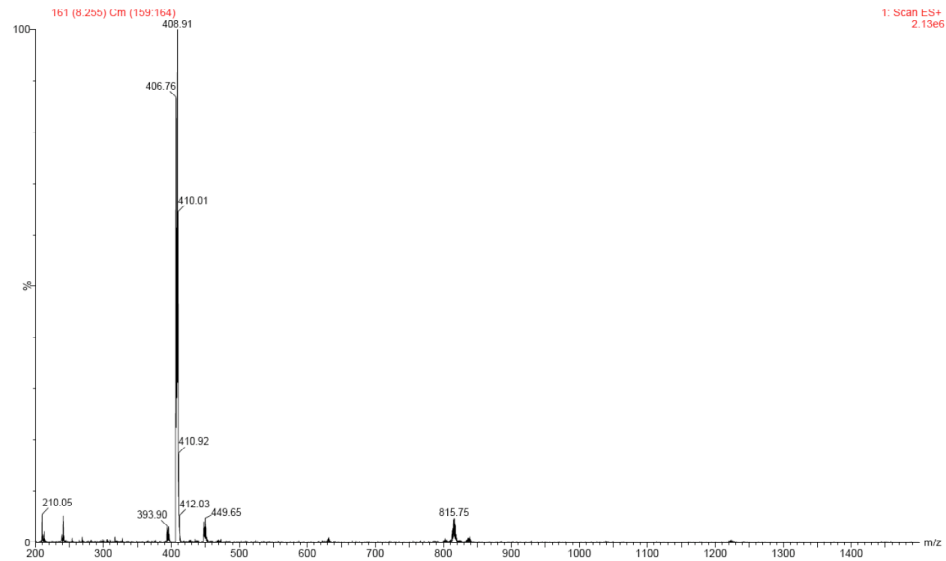

### IR spectrum of compound 19

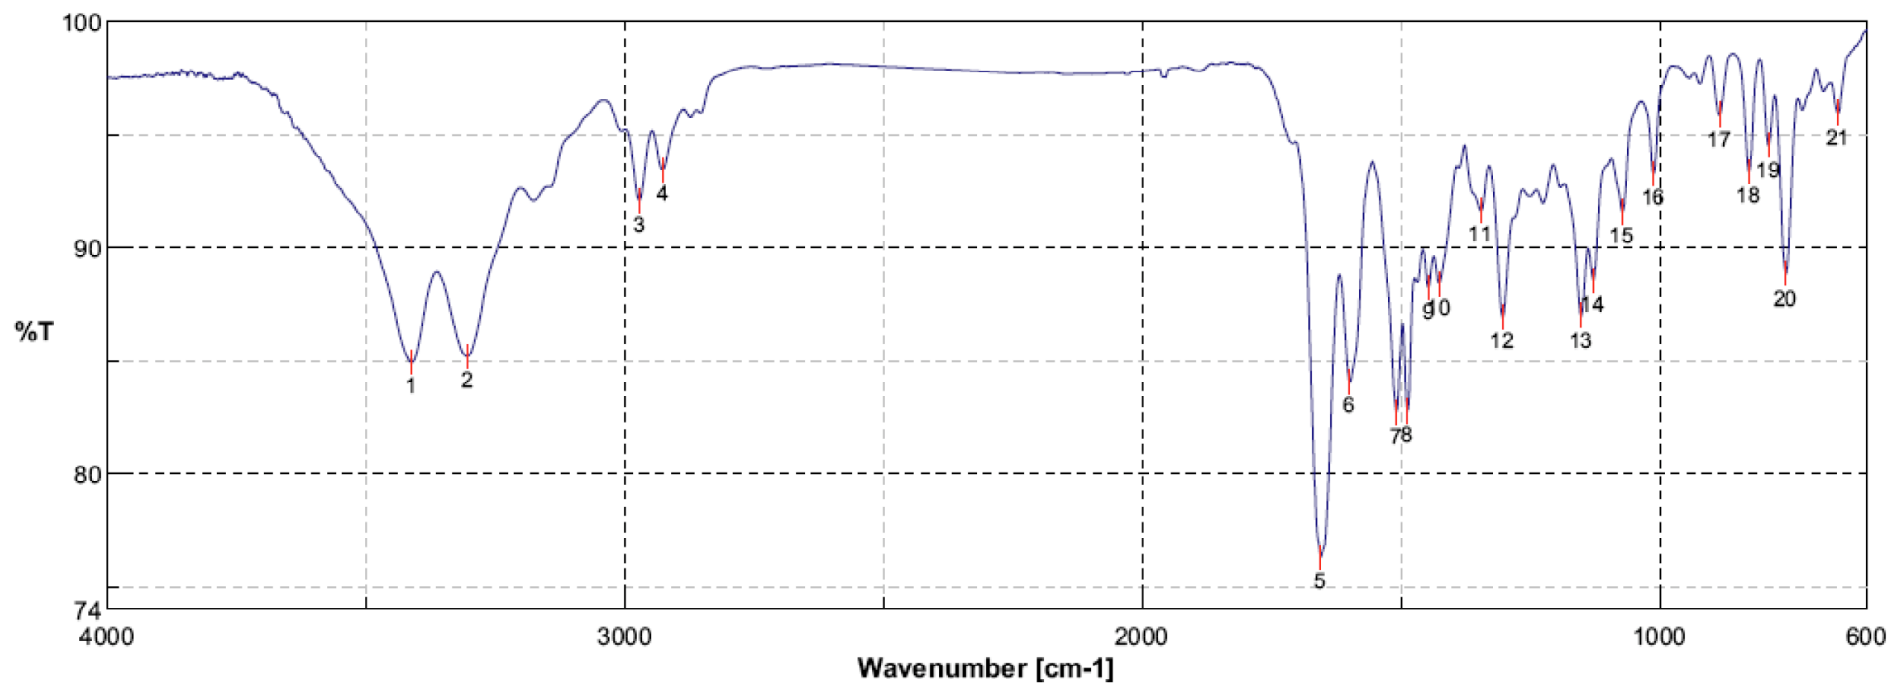

| No. | cm-1    | %T      |
|-----|---------|---------|-----|---------|---------|-----|---------|---------|-----|---------|---------|-----|---------|---------|
| 1   | 3412.9  | 84.9446 | 2   | 3305.39 | 85.1939 | 3   | 2972.73 | 92.0681 | 4   | 2927.41 | 93.4445 | 5   | 1655.11 | 76.2975 |
| 6   | 1598.7  | 84.0554 | 7   | 1509.03 | 82.7186 | 8   | 1487.33 | 82.7598 | 9   | 1447.31 | 88.2256 | 10  | 1426.58 | 88.4209 |
| 11  | 1345.59 | 91.6544 | 12  | 1303.64 | 86.9387 | 13  | 1151.78 | 86.99   | 14  | 1128.15 | 88.5842 | 15  | 1071.75 | 91.6053 |
| 16  | 1011.96 | 93.2589 | 17  | 884.684 | 95.8745 | 18  | 827.312 | 93.3565 | 19  | 789.707 | 94.5184 | 20  | 755.959 | 88.8349 |
| 21  | 655.197 | 95.9571 |     |         |         |     |         |         |     |         |         |     |         |         |

<sup>1</sup>H NMR spectrum of compound **19**

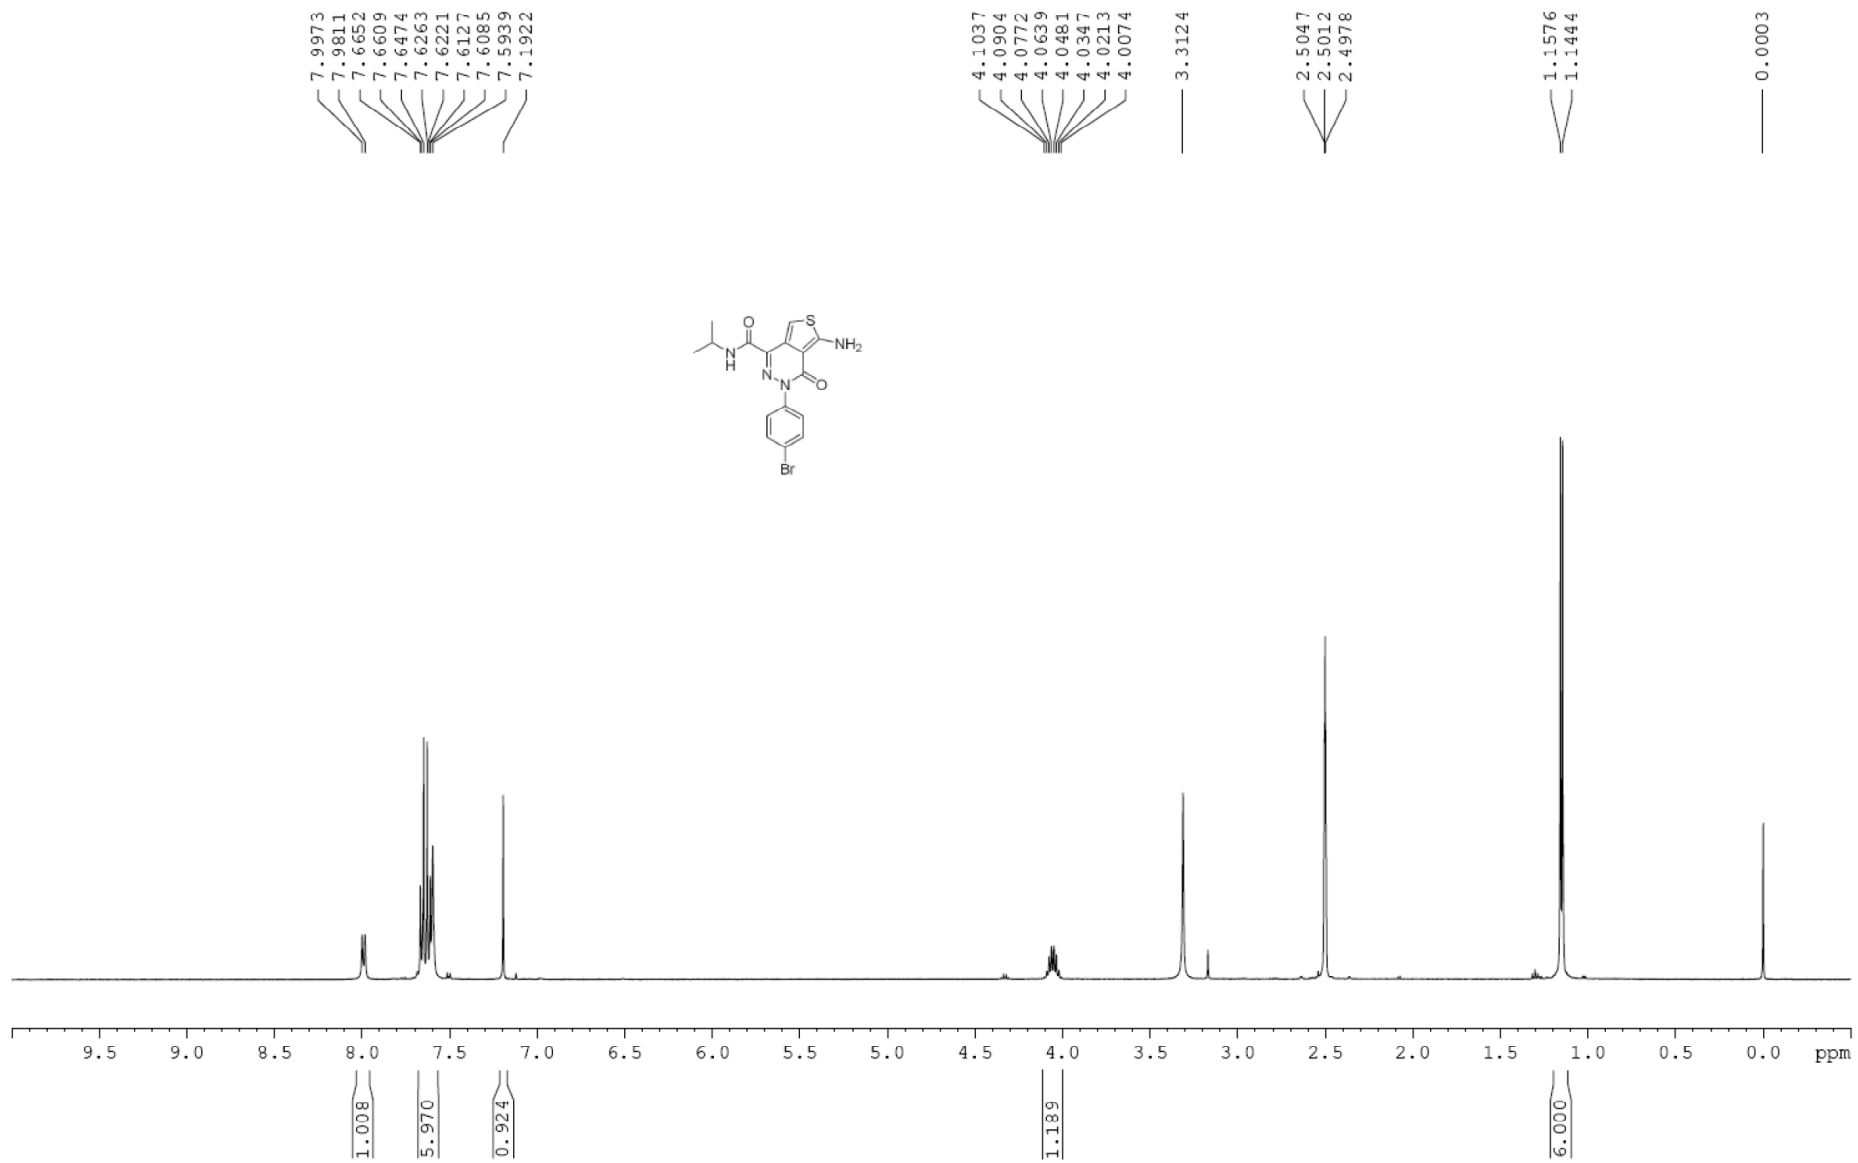

<sup>13</sup>C NMR spectrum of compound **19**

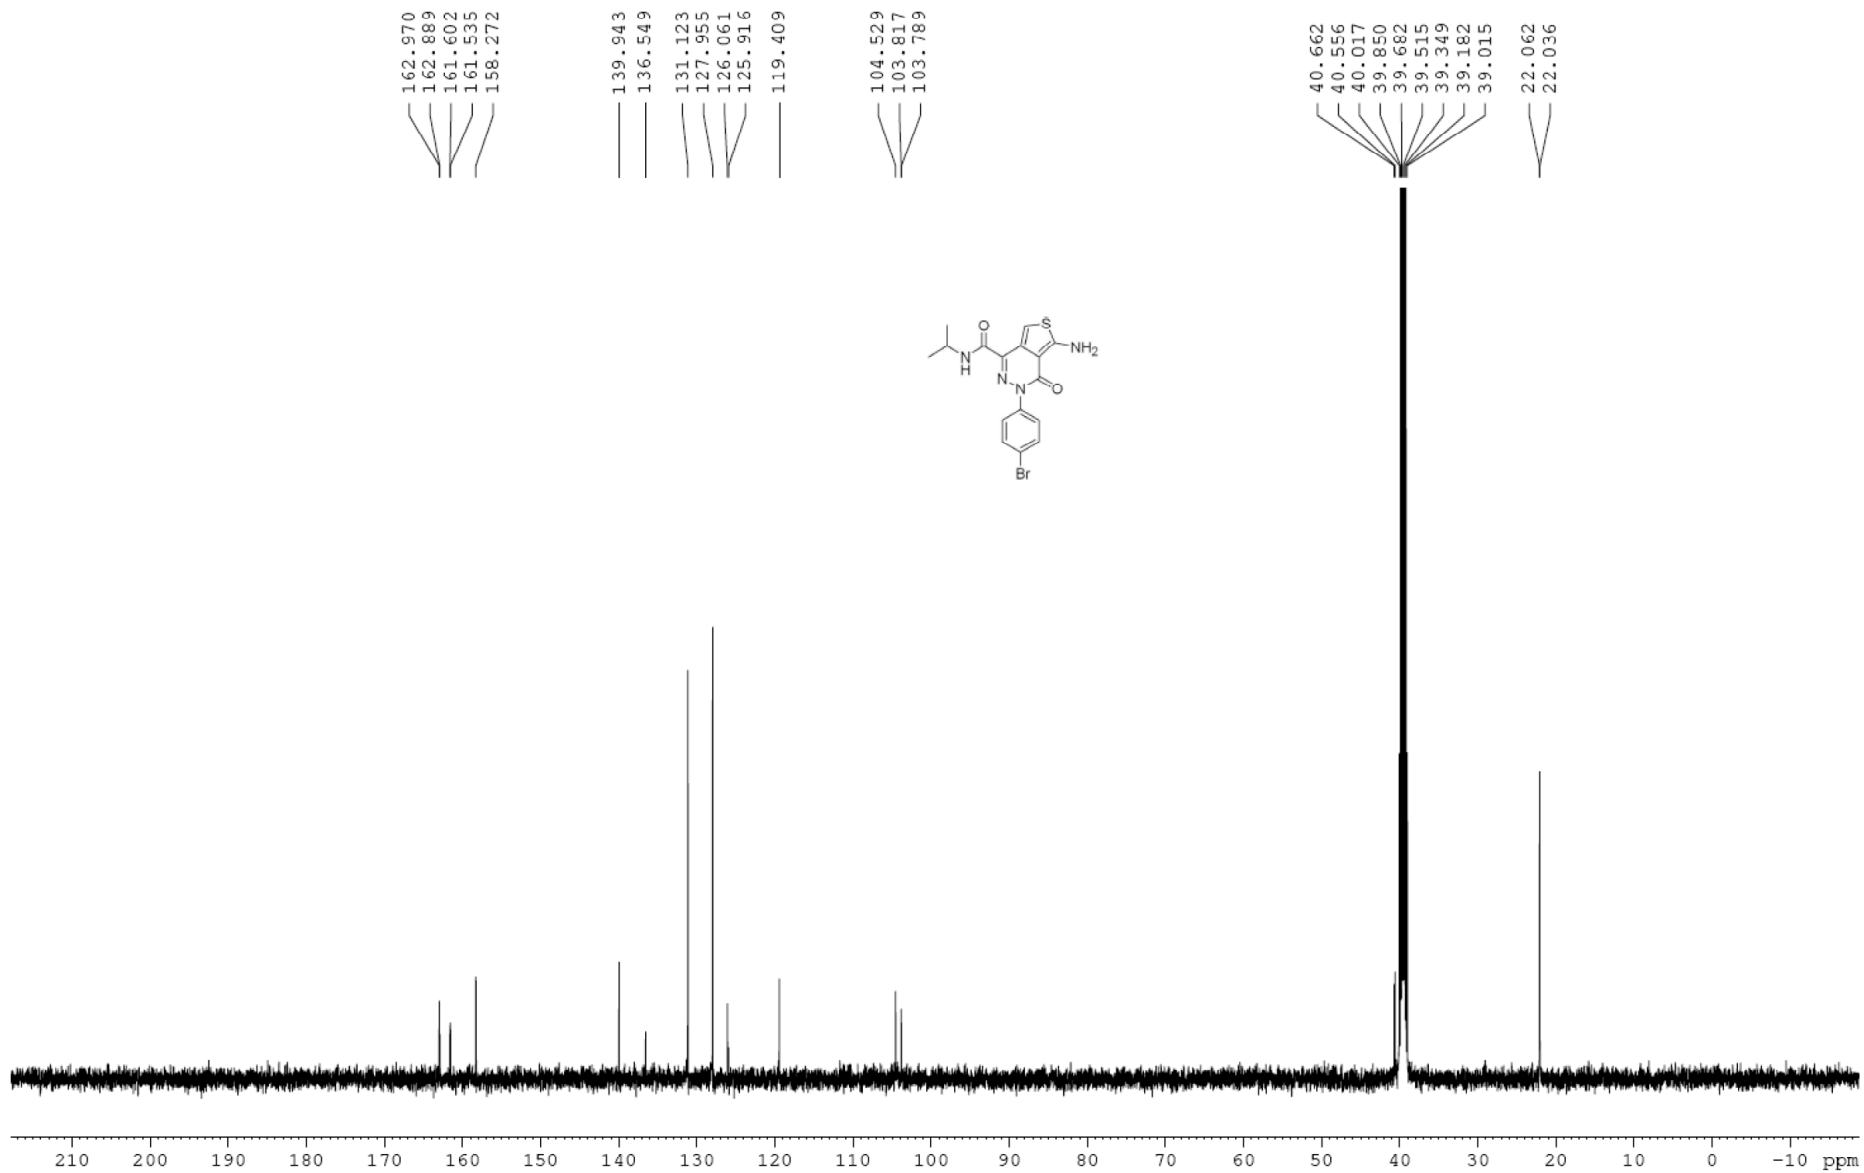

# MT-Assembly Assay

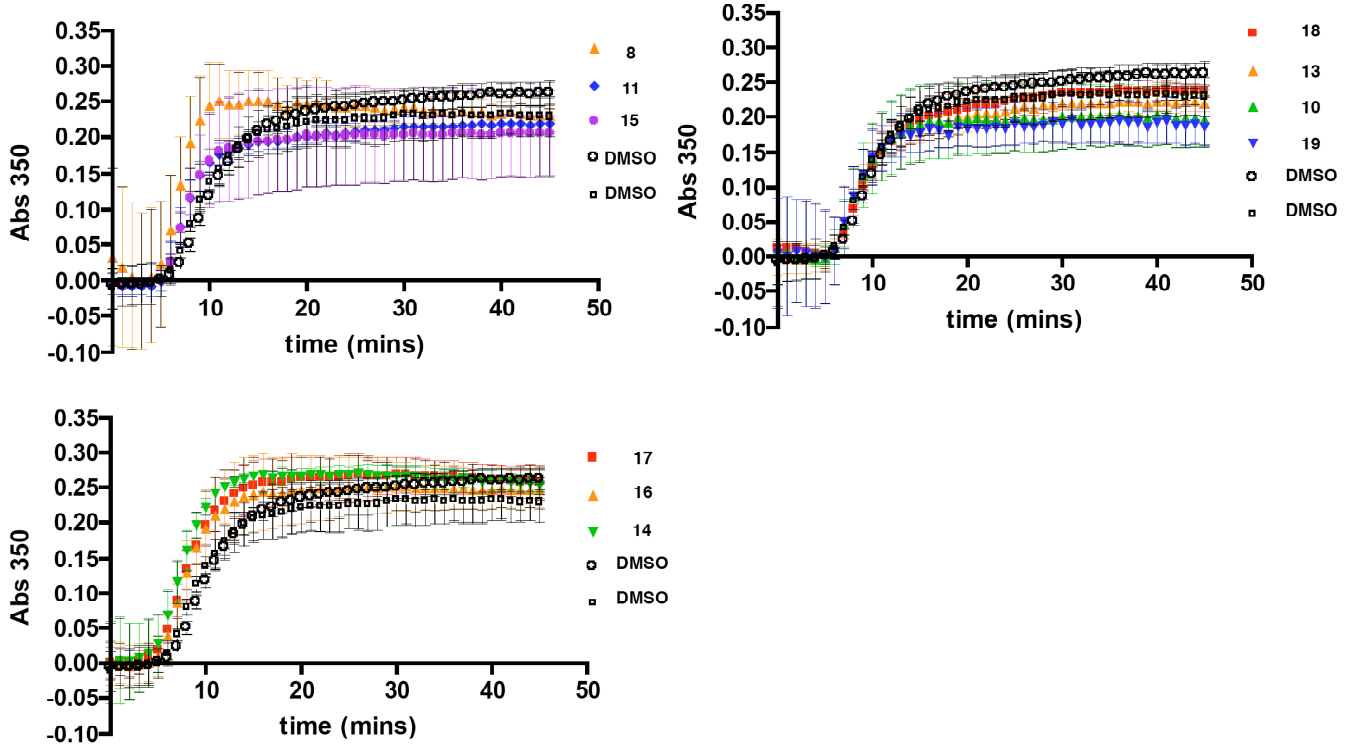

Supplement: NIHMS196594-supplement-1_si_001.pdf [file NIHMS196594-supplement-1_si_001.pdf]
